# Supplementary material for: How does multi-reference computation change the catalysis chemistry? DFT and CASPT2 studies of the Cu-catalysed coupling reactions between aryl iodides and β-diketones
Source: Royal Society of Chemistry journal article supplement (doi:10.1039/d3cp03418f), 2023-01-01
Supplement: d3cp03418f1.pdf [file d3cp03418f1.pdf]

## Supplementary Information

### **How does multi-reference computation change the catalysis chemistry? DFT and CASPT2 studies of the Cu-catalysed coupling reactions between aryl iodides and $\beta$ -diketones**

Nan He<sup>1</sup>, Naoki Nakatani<sup>1</sup>, Masahiko Hada<sup>1</sup>

*<sup>1</sup>Department of Chemistry, Faculty of Science, Tokyo Metropolitan University, 1-1 Minami-Osawa, Hachioji, Tokyo, 192-0397, Japan*

E-mail: [naokin@tmu.ac.jp](mailto:naokin@tmu.ac.jp)

## Contents

|                                                                                |    |
|--------------------------------------------------------------------------------|----|
| 1. $\omega$ -B97XD calculated energy profiles. ....                            | 3  |
| 2. Active spaces for CASSCF/CASPT2 calculation.....                            | 7  |
| 3. DFT-calculations for the OA-RE pathway .....                                | 13 |
| 4. Dependency to the size of basis sets in CASPT2 calculation.....             | 15 |
| 7. Kohn-Sham molecular orbitals analysis .....                                 | 17 |
| 8. Potential energy curves (PECs) of the singlet and triplet spin states ..... | 19 |
| 9. Data for B3LYP-D3 and CASPT2//B3LYP-D3 calculations.....                    | 20 |
| 10. $\omega$ -B97XD-optimised geometries (singlet spin state) .....            | 26 |
| 11. B3LYP-D3-optimised geometries (singlet spin state) .....                   | 41 |
| 12. TPSS-optimised geometries (singlet spin state) .....                       | 56 |
| 13. PBE0-optimised geometries (singlet spin state) .....                       | 62 |
| 14. MN15-optimised geometries (singlet spin state) .....                       | 68 |
| 15. $\omega$ -B97XD-optimised geometries (triplet spin state) .....            | 74 |
| 16. B3LYP-D3-optimised geometries (triplet spin state) .....                   | 78 |

## 1. $\omega$ -B97XD calculated energy profiles.

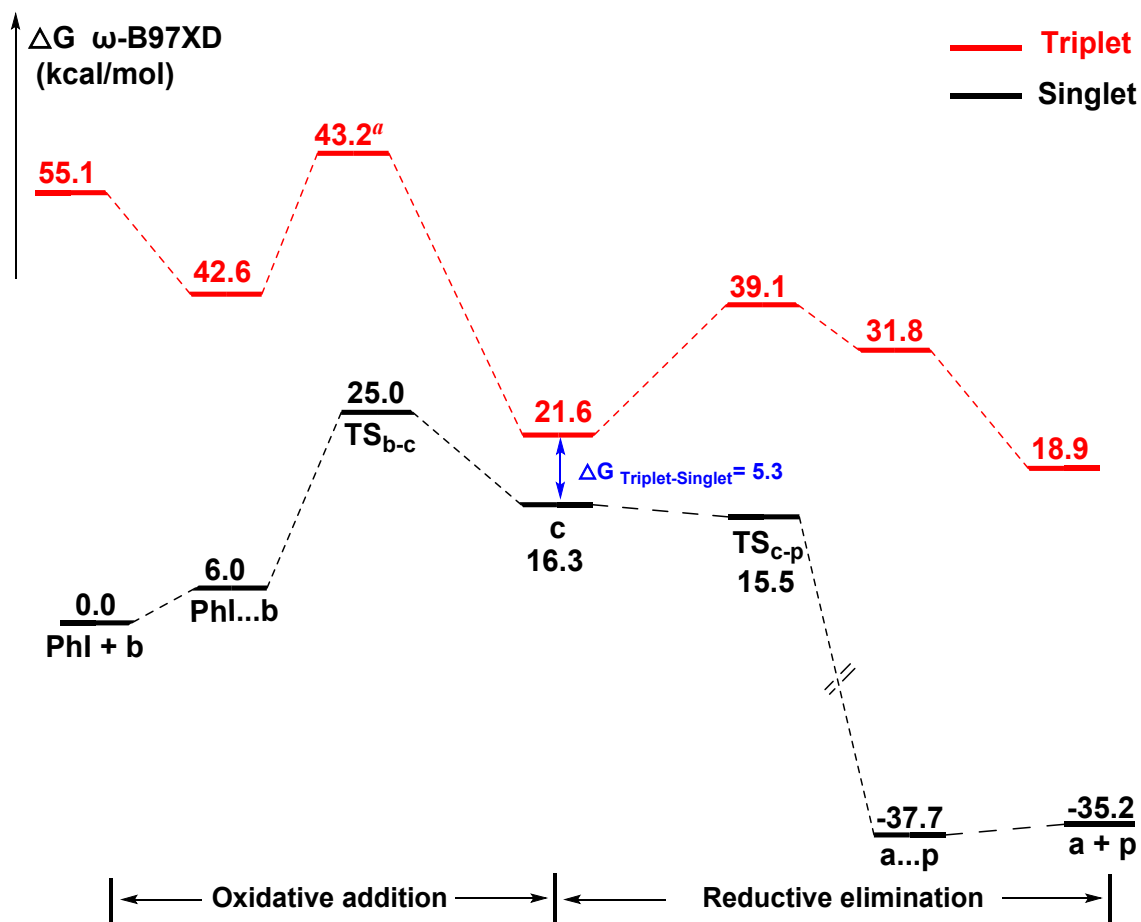

**Figure S1.** Gibbs free energy profiles of the OA-RE pathway in the singlet and the triplet spin states. <sup>a</sup> We took the geometry of TS<sub>b-c</sub> in the singlet spin state to evaluate the single-point energy in the triplet spin state, because TS<sub>b-c</sub> in the triplet spin state could not be located.

**Table S1.** The DFT-calculated  $\Delta E_{\text{S-T}}$  of complex **c** for several functionals. The CASPT2-calculated  $\Delta E_{\text{S-T}}$  was also shown.

| Functional               | $\Delta E_{\text{S-T}}$ (kcal/mol) |
|--------------------------|------------------------------------|
| B3LYP-D3                 | 15.1                               |
| B3LYP*/B3LYP-D3          | 17.6                               |
| $\omega$ -B97XD          | 11.8                               |
| PBE0                     | 14.1                               |
| TPSS                     | 19.6                               |
| TPSSh                    | 17.7                               |
| M06-L                    | 17.7                               |
| MN15                     | 14.1                               |
| CASPT2// $\omega$ -B97XD | 36.2                               |

The  $\omega$ -B97XD calculated Gibbs free energy profiles of the OA-RE pathway were shown in Figure S1. It is obvious that the triplet spin state is always higher in energy than the singlet spin state along the reaction coordinate. The smallest spin-energy gap ( $\Delta E_{S-T}$ ) between these two spin states was found in the intermediate **c** (11.8 kcal/mol in electronic energy, and 5.3 kcal/mol in Gibbs free energy). We also examined several functionals to evaluate the  $\Delta E_{S-T}$  and concluded that the intersystem crossing (ISC) never occurs in this reaction, as summarized in Table S1.

In the CASPT2 calculation, moreover, the  $\Delta E_{S-T}$  was estimated to be 36.2 kcal/mol in electronic energy, which was much larger than that calculated by DFT method. Therefore, contribution of the triplet spin state was safely excluded from this catalytic reaction along the OA-RE pathway.

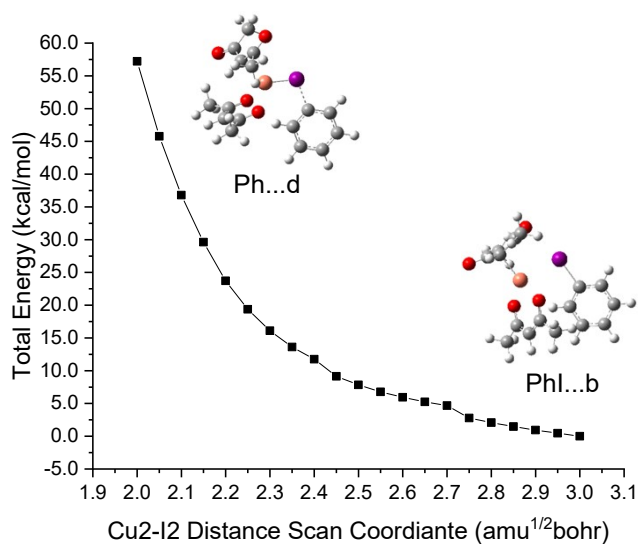

**Figure S2.** Scanned PEC for the Cu<sub>2</sub>-I<sub>2</sub> stretching in the IAT pathway.

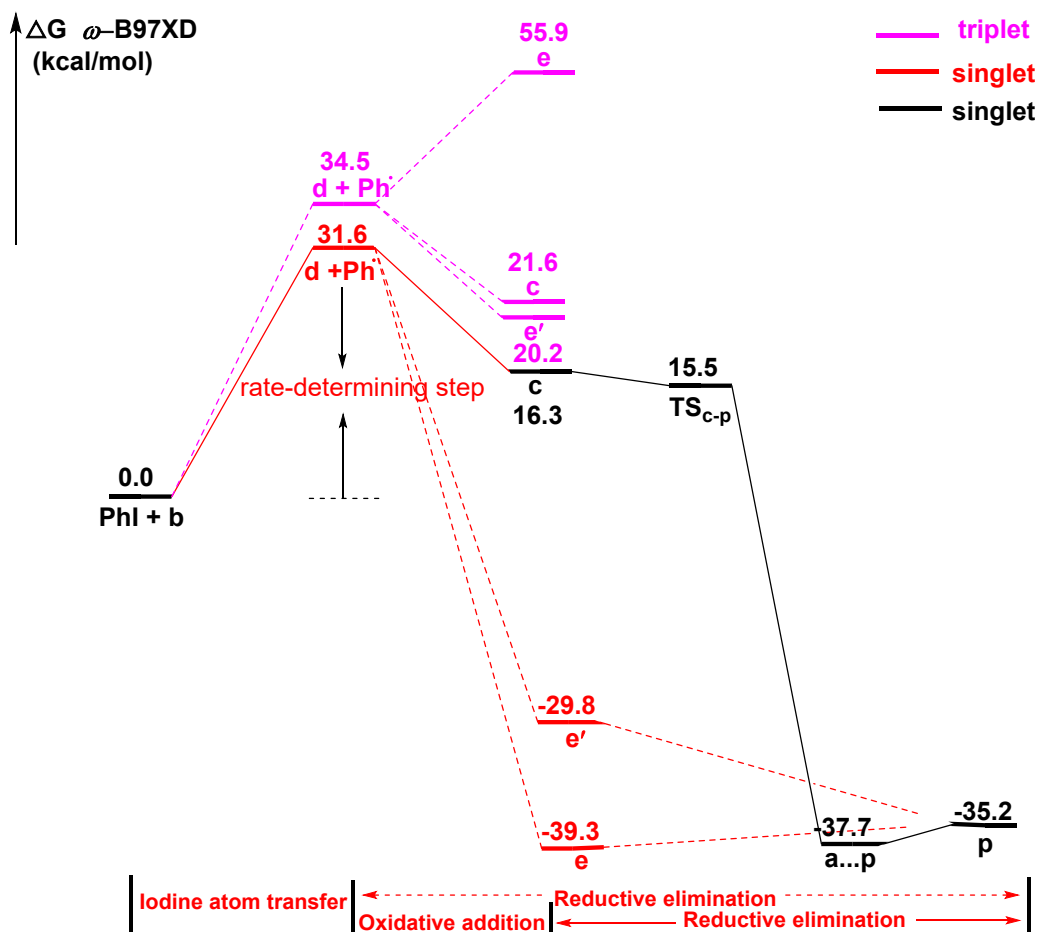

**Figure S3.** Gibbs free energy profiles for the IAT pathway in the singlet and the triplet spin states.

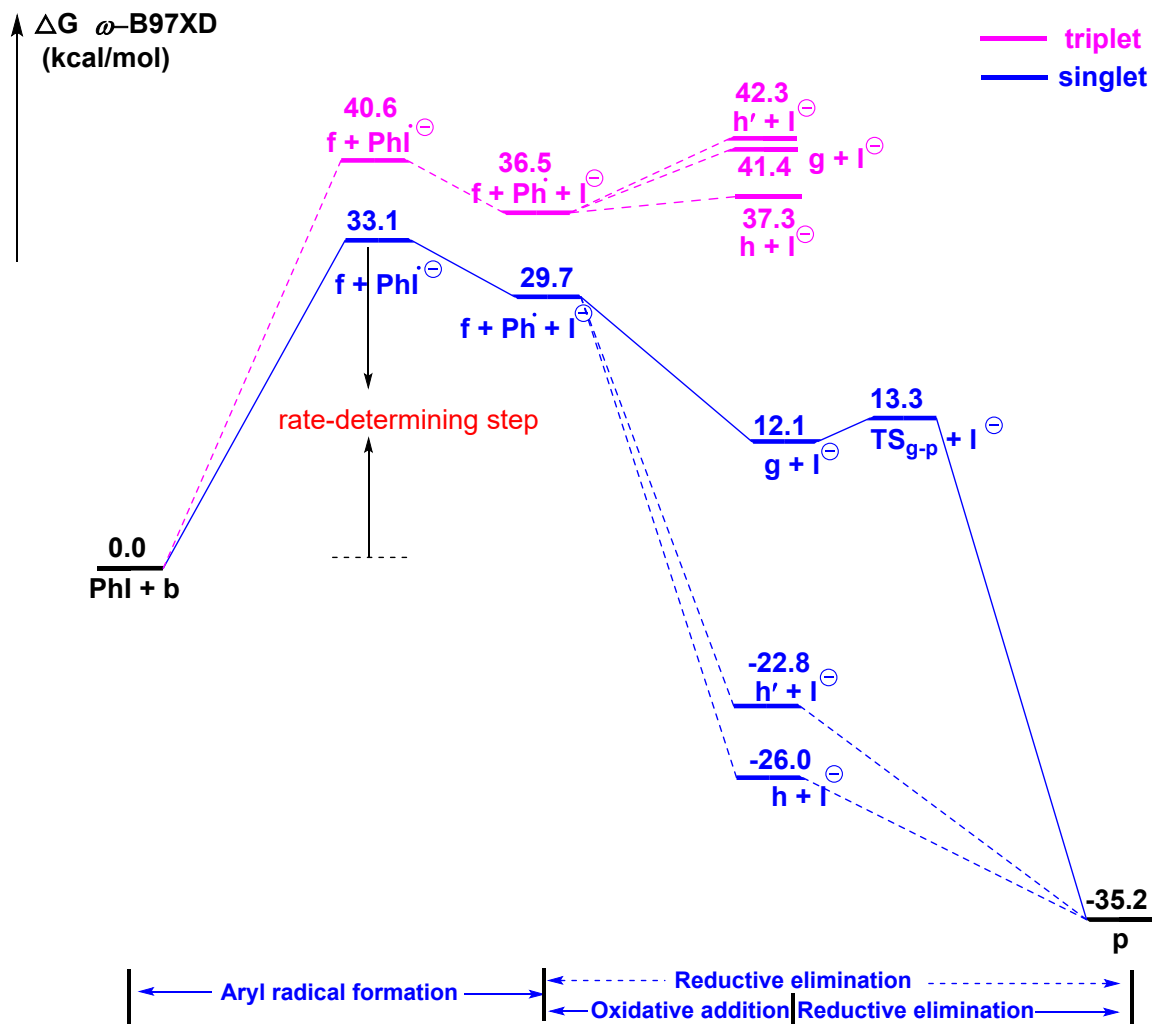

**Figure S4.** Gibbs free energy profiles for the SET pathway in the singlet and the triplet spin states.

The energies of precursory complexes  $\mathbf{d}+\text{Ph}$  (IAT pathway) and  $\mathbf{f}+\text{PhI}^-$  (SET pathway) in the triplet spin state were computed to be 34.5 kcal/mol and 40.6 kcal/mol higher than the energy of a reactant  $\mathbf{d}+\text{Ph}$  in the singlet spin state, respectively. Since  $\mathbf{d}+\text{Ph}$  or  $\mathbf{f}+\text{PhI}^-$  consists of a pair of the doublet spin states, the singlet and the triplet spin states are degenerated. Thus, we also computed the triplet energies of intermediates  $\mathbf{e}$ ,  $\mathbf{e}'$ ,  $\mathbf{h}$ ,  $\mathbf{h}'$  and  $\mathbf{g}$ . Consequently, we found that these intermediates in the IAT and the SET pathways were less stable than those in the singlet spin state so that the catalytic reaction would occur neither by the IAT pathway nor by the SET pathway.

## 2. Active spaces for CASSCF/CASPT2 calculation.

### **b + PhI**

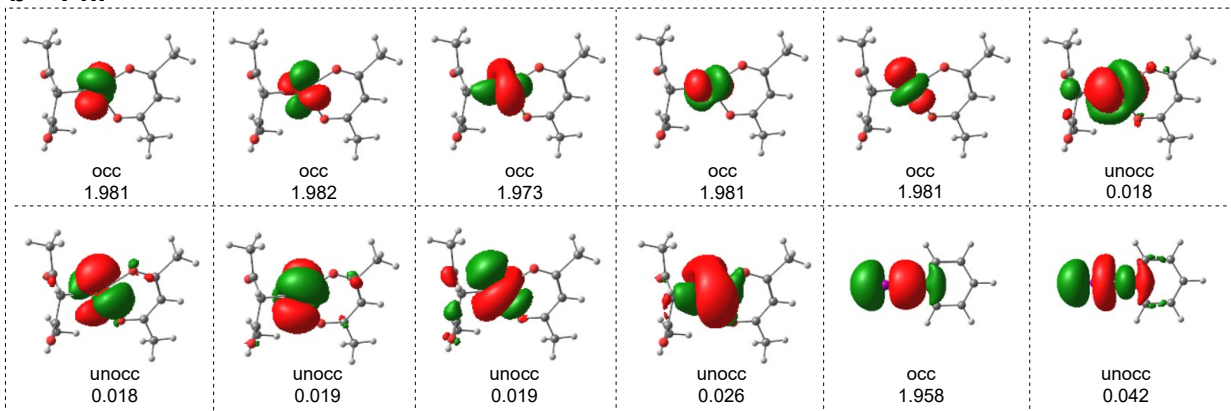

### **IAT (d + Ph-radical)**

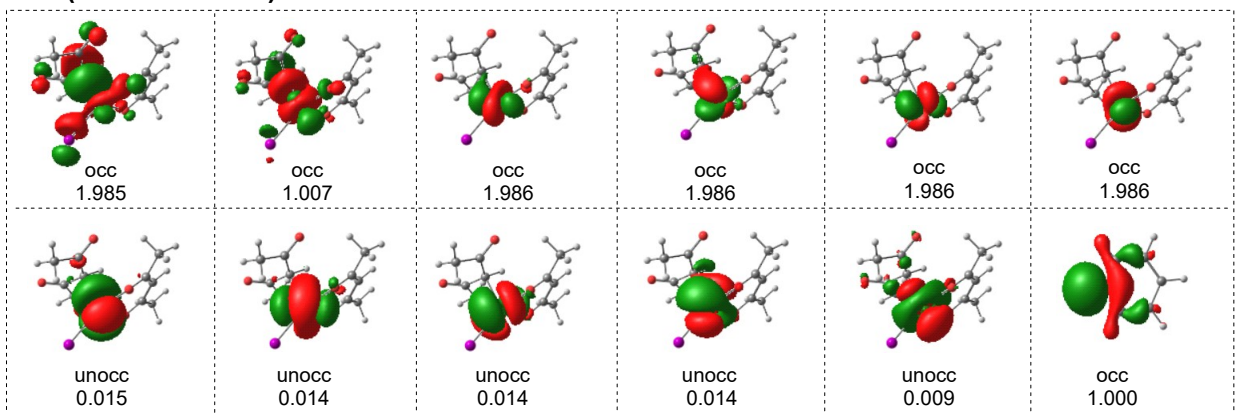

### **SET (f + PhI-radical)**

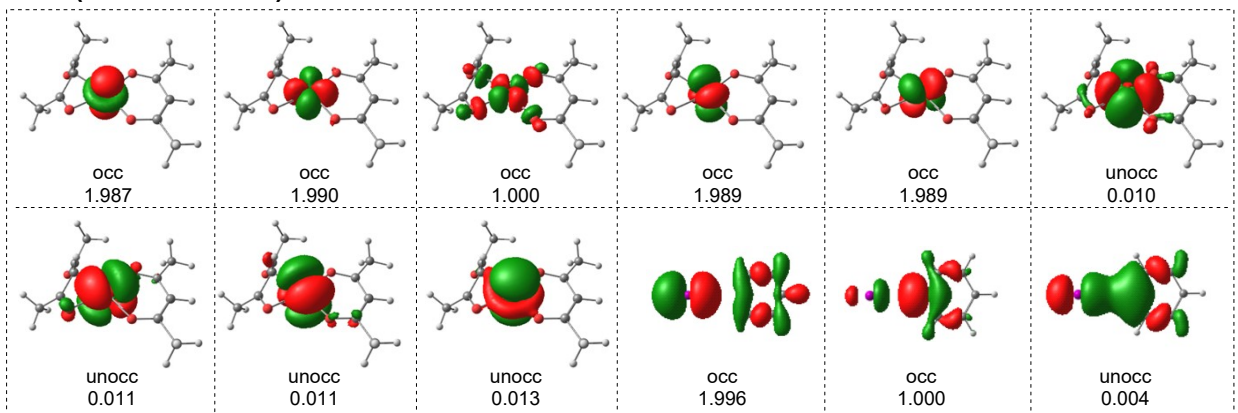

**Figure S5.** The active orbitals considered in the CASSCF/CASPT2 singlet-point calculations. Natural orbital occupation numbers of complexes **b + PhI**, **d + Ph-radical**, and **f + PhI-radical** were also shown.

**PhI...b**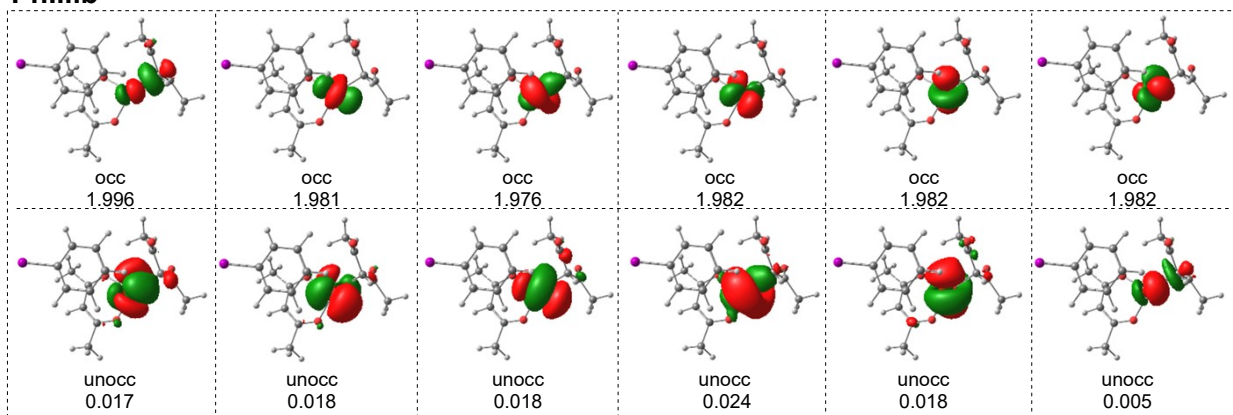**TS<sub>b-c</sub>**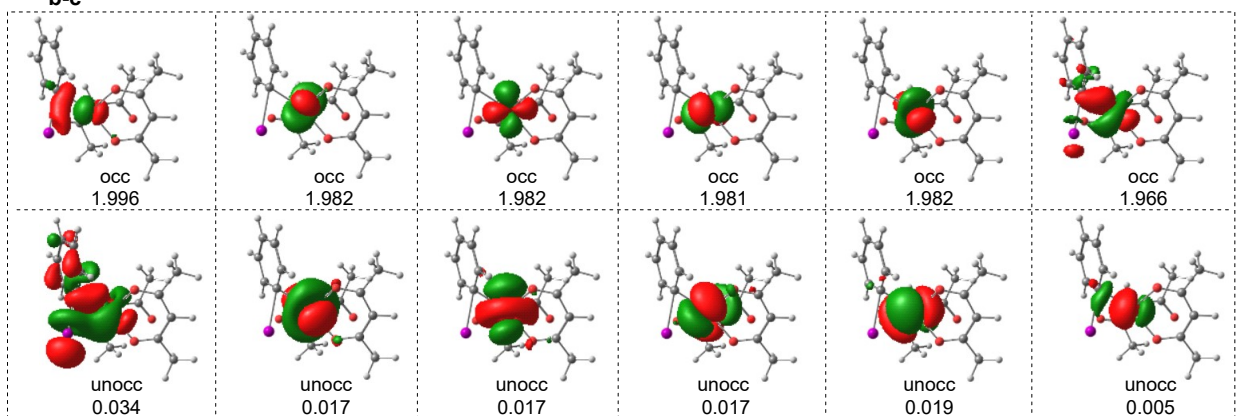**c**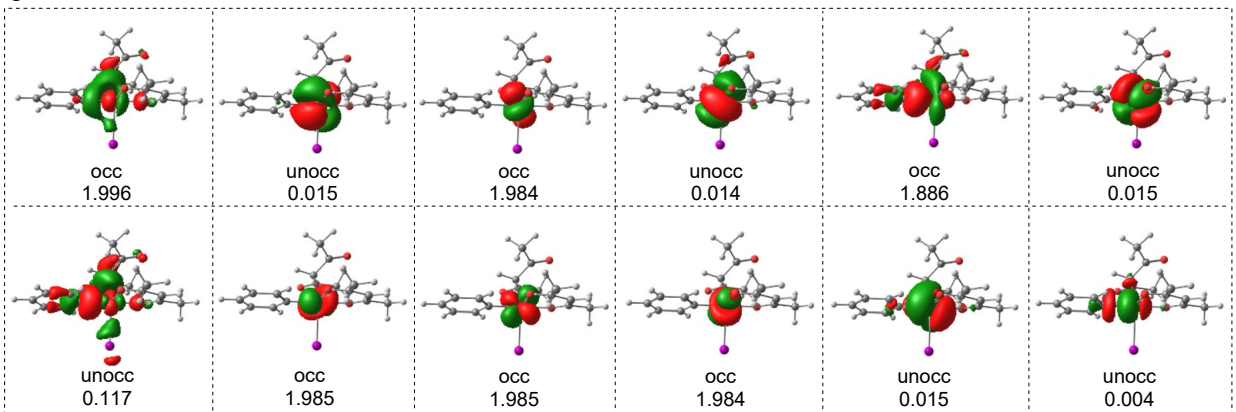**Figure S6.** Active spaces and natural orbital occupation numbers of **PhI...b**, **TS<sub>b-c</sub>**, and **c**.



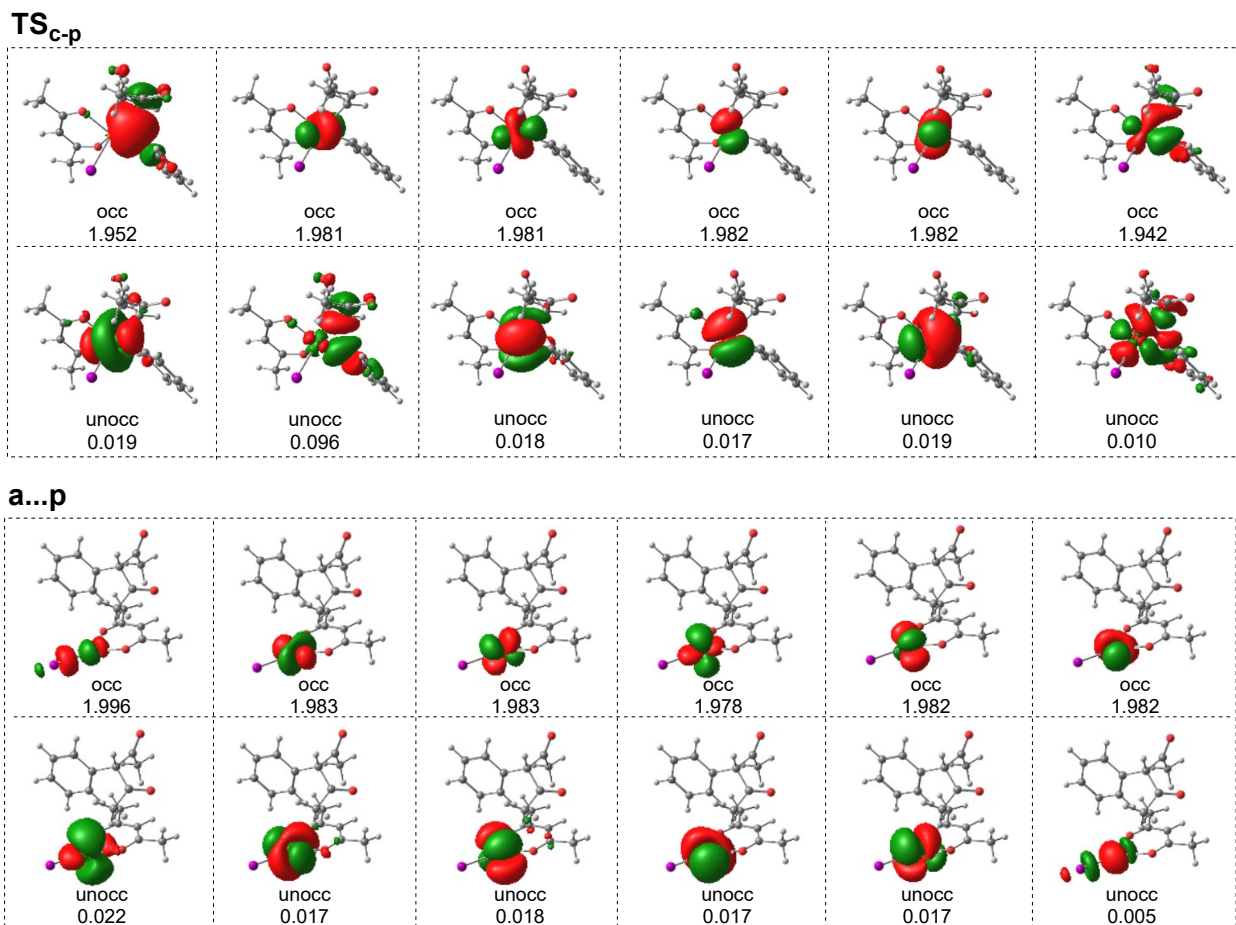

**Figure S7.** Active spaces and natural orbital occupation numbers of **TS<sub>c-p</sub>**, and **a...p**.

The active space including 10 electrons in 10 orbitals (denoted as 10e in 10o) was considered for precursory complexes **b**, which consists of the five 3d orbitals and the corresponding five 3d' orbitals (Figure S5, top). Energy of PhI was evaluated by using active space (2e in 2o) comprising a C-I  $\sigma$  bond orbital and its corresponding one C-I  $\sigma^*$  anti-bond orbital. On the other hand, the active space including 11 electrons in 11 orbitals (denoted as 11e in 11o) was considered for precursory complexes **d**, which involves the five 3d orbitals and the four 3d' orbitals corresponding the four doubly-occupied 3d orbitals (Figure S5, middle). Additionally, one Cu-ligand  $\sigma$  bond orbital (doubly occupied) is also involved in the active space. We performed the CASSCF(1e in 1o) calculations for Ph radicals, in which the active space only involves a singly-occupied orbital of the Ph radical. Furthermore, the active space including 9 electrons in 9 orbitals (denoted as 9e in 9o) was considered for precursory complexes **f**, which involves the five 3d orbitals and the four 3d' orbitals corresponding the four doubly-occupied 3d orbitals (Figure S5, bottom). We performed

the CASSCF(3e in 3o) calculations for PhI radicals, in which the active space involves a C-I  $\sigma$  bond orbital and its corresponding one C-I  $\sigma^*$  anti-bond orbital, as well as a singly-occupied orbital of the Ph radical. In total, these choices of the active space were of the 12 electrons in 12 orbitals which were consistent with the latter reaction steps. However, it should be noted that CASSCF/CASPT2 method is not size-extensive in case where the strong electron correlation appears. Thus, the CASPT2 reaction energy of overall catalytic cycle is not quantitatively useful.

In the OA and RE steps, we performed the CASSCF(12e in 12o) calculation for each complex. Complex **PhI...b** is an optimised structure in which the PhI is weakly bound to complex **b**. The active space of complex **PhI...b** contains the five 3d orbitals and the corresponding five 3d' orbitals, in which one orbital includes the Cu-C  $\sigma$ -bonding orbital between the Cu centre and  $\beta$ -diketone group (Figure S6, top). Additionally, one 3p orbital of Cu and its corresponding unoccupied orbital are also involved in the active space. In the transition state **TS<sub>b-c</sub>**, the active space involves the five 3d orbitals and the corresponding the five 3d' orbitals, as well as one 3p orbital of Cu and its corresponding unoccupied orbital, in which the Cu-C  $\sigma$ -bonding orbital describes interaction between the Cu centre and the phenyl group (Figure S6, middle). This Cu-C  $\sigma$ -bonding orbital is essential for the OA reaction and the others are important for the strong electron correlation from Cu centre. In the intermediate complex **c**, the active space involves the five 3d orbitals and the corresponding five 3d' orbitals, in which the Cu-C  $\sigma$ -bonding orbital describes interaction between the Cu centre and the phenyl/diketone group (Figure S6, bottom). Additionally, one 3p orbital of Cu and its corresponding unoccupied orbital are also included in the active space, which also describes the weak  $\sigma$  bond orbital between the phenyl and diketone ligands. In the transition state **TS<sub>c-p</sub>**, the active space involves the five 3d orbitals and the corresponding the five 3d' orbitals, as well as one  $\sigma$  bond orbital and its corresponding unoccupied orbital between the phenyl and diketone ligands, in which the Cu-C  $\sigma$ -bonding orbital describes interaction between the Cu centre and the phenyl/diketone group (Figure S7, top). This Cu-C  $\sigma$ -bonding orbital is essential for the RE reaction and the others are important for the strong electron correlation from Cu centre. In the complex **a...p**, the active space involves the five 3d orbitals and the corresponding five 3d' orbitals, as well as the one 3p orbital of Cu and its corresponding unoccupied orbital (Figure S7, bottom).

To check the convergence of size of the active space, we performed CASSCF(10e in 10o) calculations and the corresponding CASPT2 calculations, in which the active space only included

five 3d and five 3d' orbitals of the Cu centre. As a result, the energy profile of the CASSCF(10e in 10o)/CASPT2 method was quantitatively the same as that of the CASSCF(12e in 12o)/CASPT2 method (see Figure S8). Thus, we concluded that size of the active space converged at the CASSCF(12e in 12o)/CASPT2 level of theory. This was because the multi-reference character less occurred in these Cu complexes. In fact, 90% or more of the CASSCF wavefunction consisted of Hartree-Fock configuration, as shown in Table S2, even though the reaction involved bond cleavage/formation processes. In case where the active space is insufficient, collapse of the perturbation correction (known as appearance of intruder states) occurs to see almost zero reference weight in CASPT2 calculation. In our calculation, obtained reference weights shown in Table S2 indicated that the intruder state problem was successfully excluded by employing the imaginary level shift of 0.1 a.u.

Furthermore, from the empirical relationship between the CASPT2 reference weight and number of correlated electrons (S. Langhoff, *Quantum Mechanical Electronic Structure Calculations with Chemical Accuracy*, **2012**, Springer, p.368), the CASPT2 reference weight of our system (134 correlated electrons) was estimated to be 27-51%. Thus, the reference weight of 45% in Table S2 showed that our CASPT2 results were reliable.

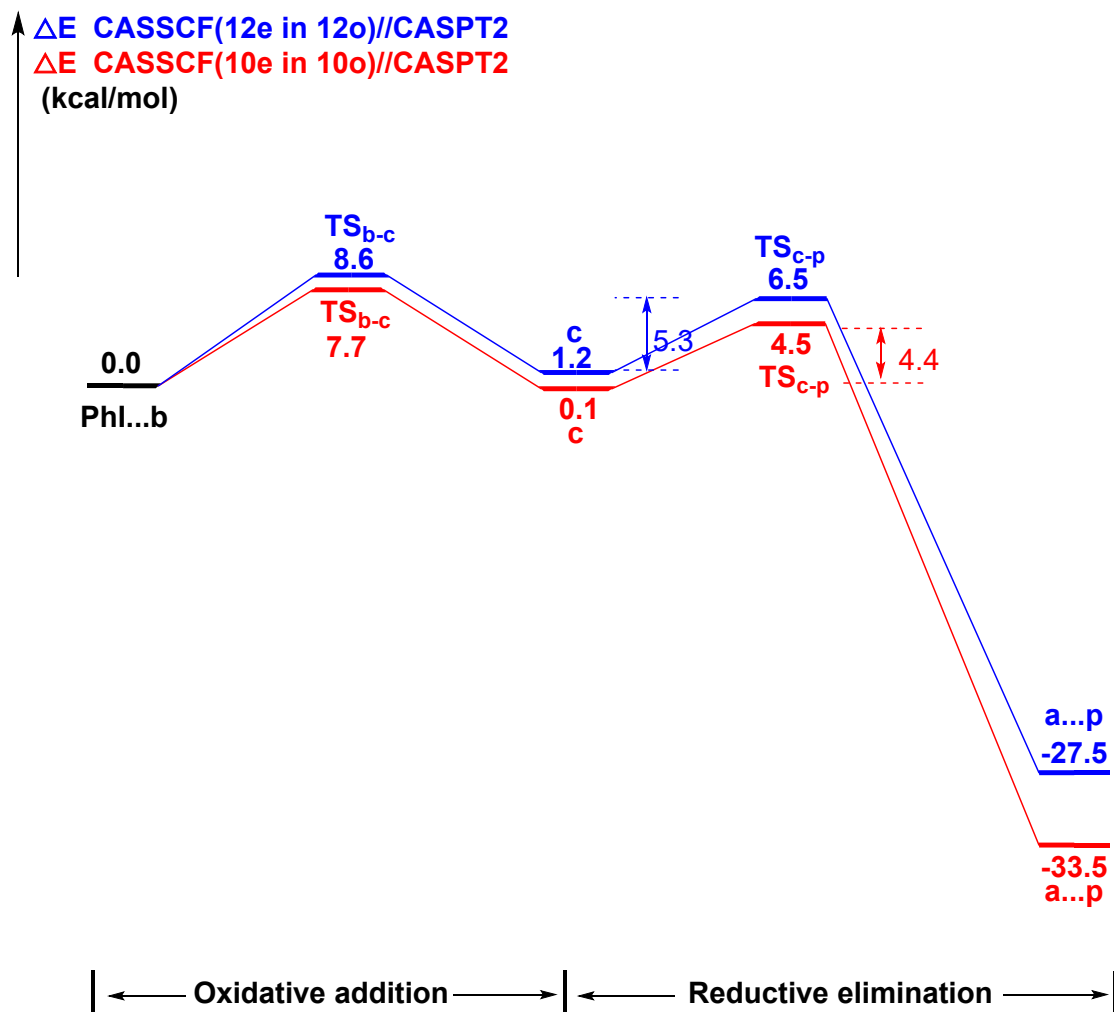

**Figure S8.** Electronic energy profile of the OA-RE mechanism calculated by the CASSCF(10e in 10o)/CASPT2 method (red line) and the CASSCF(12e in 12o)/CASPT2 method (blue line). The electronic energy of **PhI...b** was taken as the reference (energy zero).

**Table S2.** Weight of Hartree-Fock configuration in the CASSCF(12e in 12o) wavefunction, and the reference weight in the CASPT2 wavefunction.

|                         | <b>CASSCF</b>                         | <b>CASPT2</b>           |
|-------------------------|---------------------------------------|-------------------------|
| <b>Complexes</b>        | <b>Weight of Hartree-Fock config.</b> | <b>Reference weight</b> |
| <b>PhI...b</b>          | 0.95206                               | 0.46067                 |
| <b>TS<sub>b-c</sub></b> | 0.94770                               | 0.45429                 |
| <b>c</b>                | 0.91357                               | 0.45651                 |
| <b>TS<sub>c-p</sub></b> | 0.91490                               | 0.45932                 |
| <b>a...p</b>            | 0.95393                               | 0.46624                 |

### 3. DFT-calculations for the OA-RE pathway

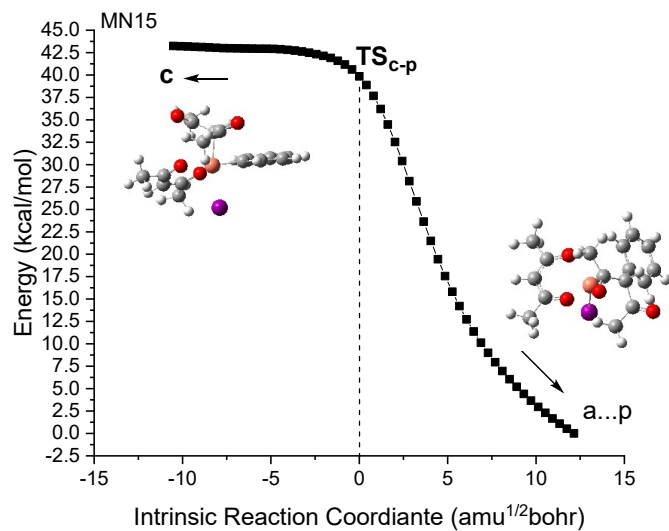

Figure S9. The PEC calculated by MN15 along the  $\omega$ -B97XD-optimised IRC in the RE step.

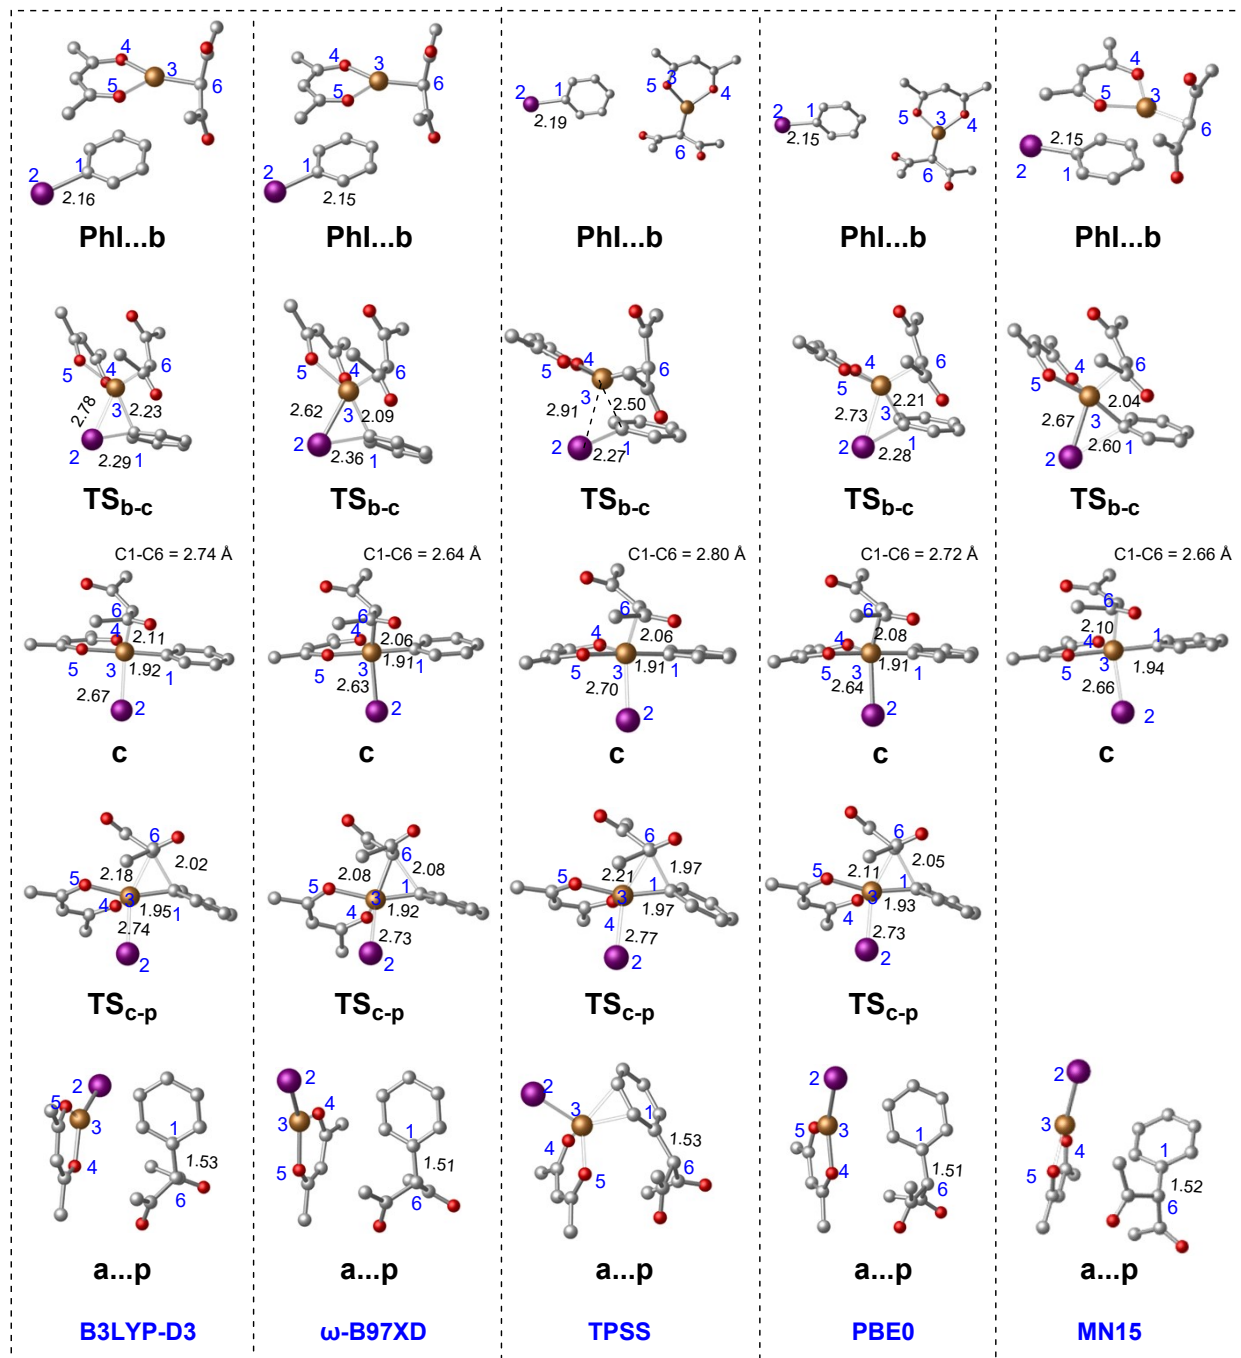

**Figure S10.** DFT-optimised geometries for the OA-RE pathway (hydrogen atoms were not displayed for the sake of simplicity). Numbers were interatomic distance in Å.

#### 4. Dependency to the size of basis sets in CASPT2 calculation.

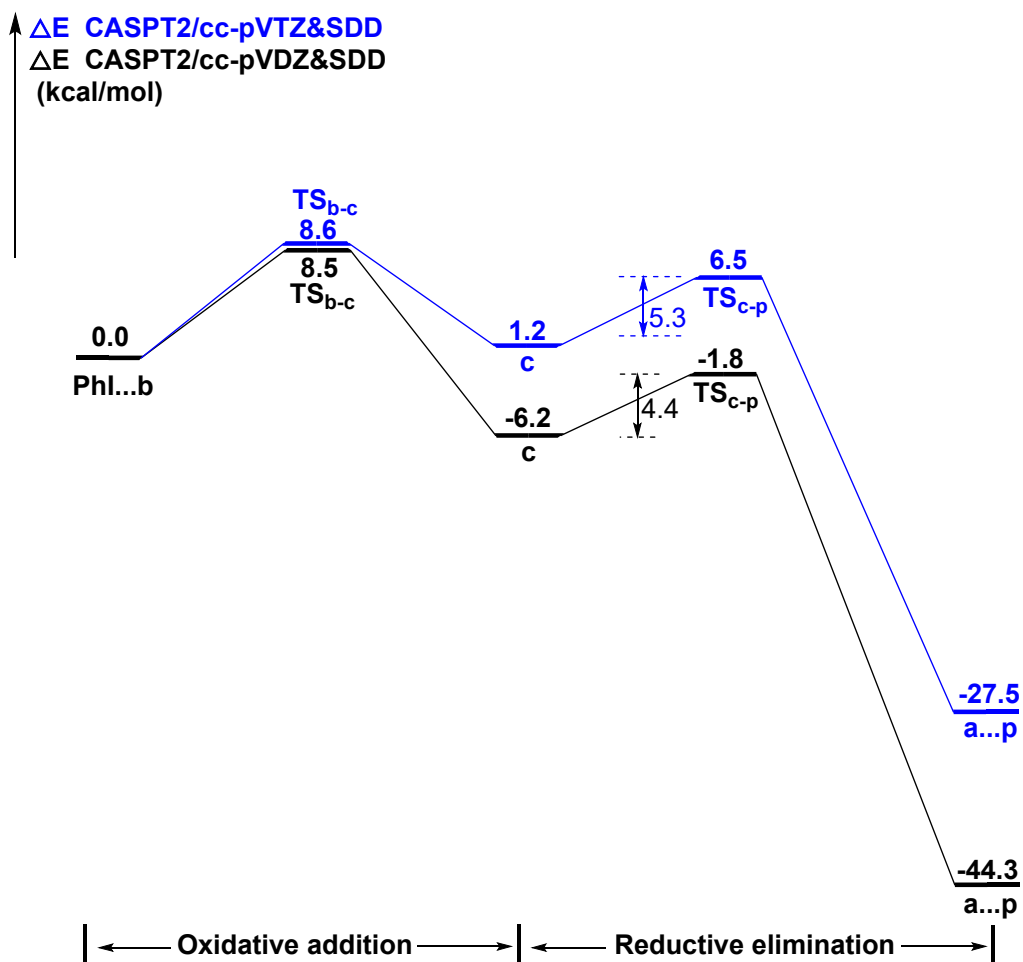

**Figure S11.** Electronic energy profiles of the OA-RE mechanism calculated by CASPT2// $\omega$ -B97XD with SDD basis set for Cu and cc-pVTZ basis sets for the other atoms (blue line) and with SDD basis set for Cu and cc-pVDZ basis sets for the other atoms (black line). The electronic energy of **PhI...b** was taken as the reference (energy zero).

In general, electron correlation energy slowly converges with respect to size of basis sets. Thus, we examined dependency to the size of basis sets in CASPT2 calculation using the correlation-consistent valence double- $\zeta$  (cc-pVDZ) and the valence triple- $\zeta$  (cc-pVTZ) basis sets. Note that the SDD basis sets was employed for Cu atom in both cases. As a result, although the cc-pVDZ calculation gave the larger reaction energies both for the OA and the RE steps, the activation energies were less affected (errors were less than 1 kcal/mol), as shown in Figure S11. Thus, we employed the cc-pVTZ basis sets for the CASPT2 energy profile, but the cc-pVDZ basis sets for



the PEC calculation along the IRCs of the OA and the RE steps to save the computational resources.

## 7. Kohn-Sham molecular orbitals analysis

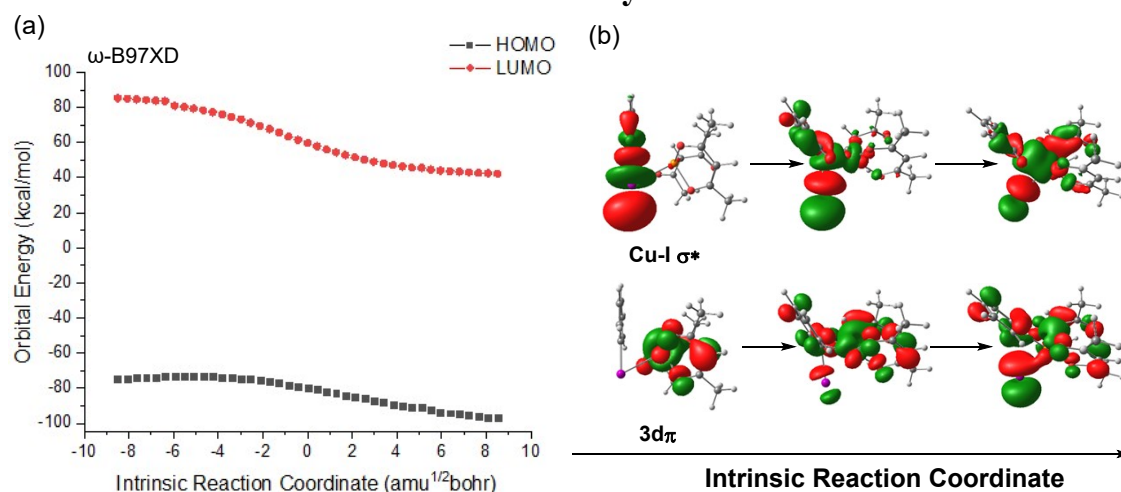

**Figure S12.** Change in the orbital energies of HOMO and LUMO calculated by  $\omega$ -B97XD functional in the OA step.

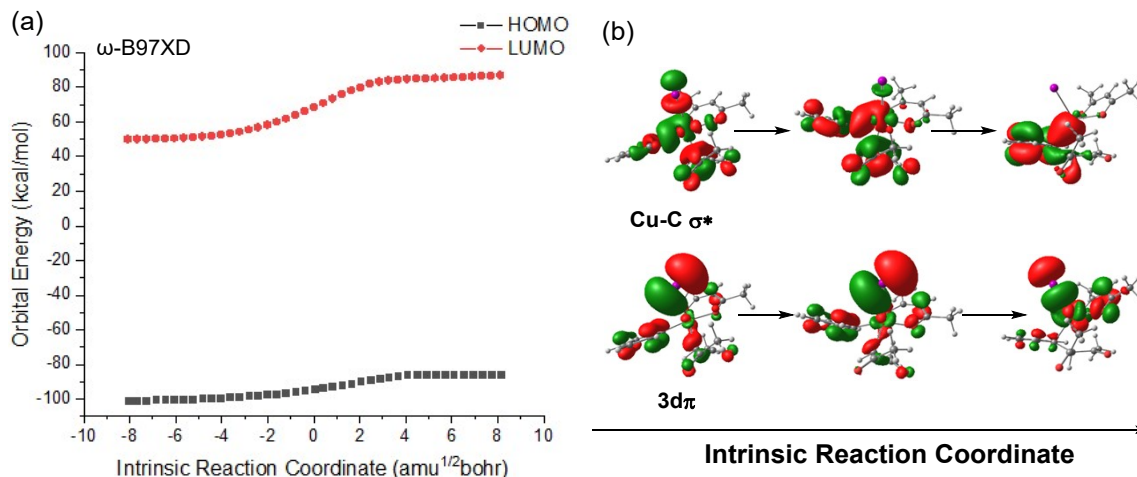

**Figure S13.** Change in the orbital energies of HOMO and LUMO calculated by  $\omega$ -B97XD functional in the RE step.

To explain the role of the 3d orbitals, we analysed the change in Kohn-Sham molecular orbitals (MOs) along the intrinsic reaction coordinate (IRC). Changes in the orbital energies of HOMO and LUMO were shown in Figure S12(a) and Figure S13(a) for the OA and the RE steps, respectively. Orbital pictures from leftmost, mid, and rightmost-points were also displayed in Figure S12(b) and Figure S13(b) for the OA and the RE steps, respectively. From Figure S12(b), it is shown that the 3d $\pi$  orbital interacts with the C-I antibonding  $\sigma^*$  orbital to result in bonding

interaction between Cu-C and Cu-I in the OA step. From Figure S13(b), on the other hand, it is shown that the  $3d\pi$  orbital interacts with the Cu-C antibonding  $\sigma^*$  orbital to result in bonding interaction between C-C.

## 8. Potential energy curves (PECs) of the singlet and triplet spin states

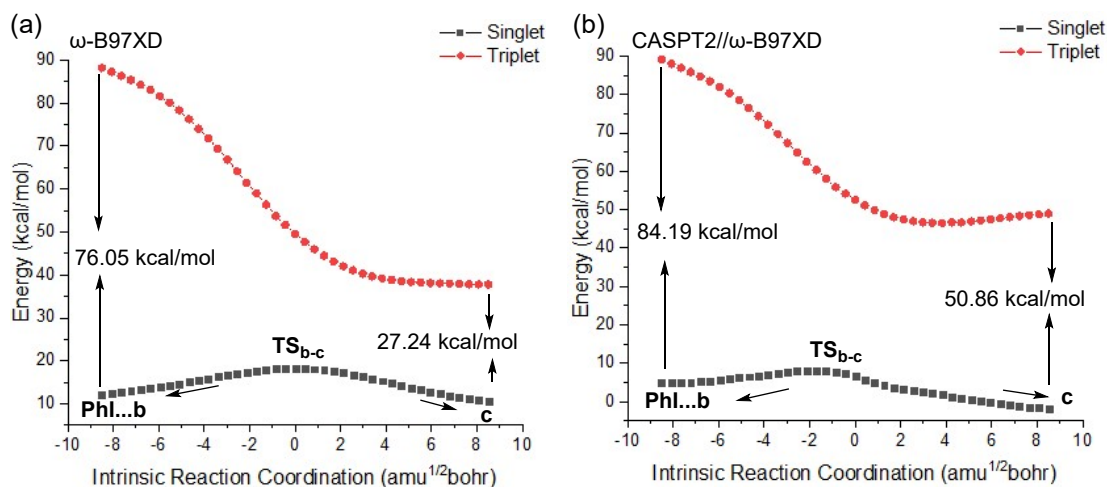

**Figure S14.** PECs along the IRC of  $TS_{b-c}$  optimised by  $\omega$ -B97XD functional. (a) PECs evaluated by  $\omega$ -B97XD functional and (b) by CASPT2 method, for the singlet and triplet spin states.

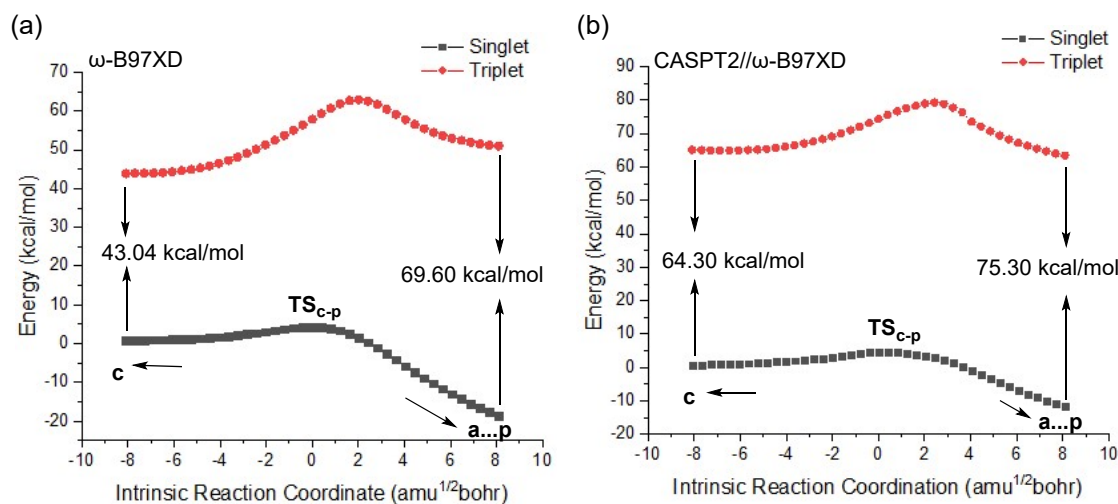

**Figure S15.** PECs along the IRC of  $TS_{c-p}$  optimised by  $\omega$ -B97XD functional. (a) PECs evaluated by  $\omega$ -B97XD functional and (b) by CASPT2 method, for the singlet and triplet spin states.

From Figure S14 and S15, a large singlet-triplet gap was found both in the OA and the RE steps, indicating that the ISC never occurs during the OA-RE pathway. It should be noted that the CASPT2 results were surprisingly close to the DFT( $\omega$ -B97XD) results, and CASSCF/CASPT2 calculated results.

## 9. Data for B3LYP-D3 and CASPT2//B3LYP-D3 calculations

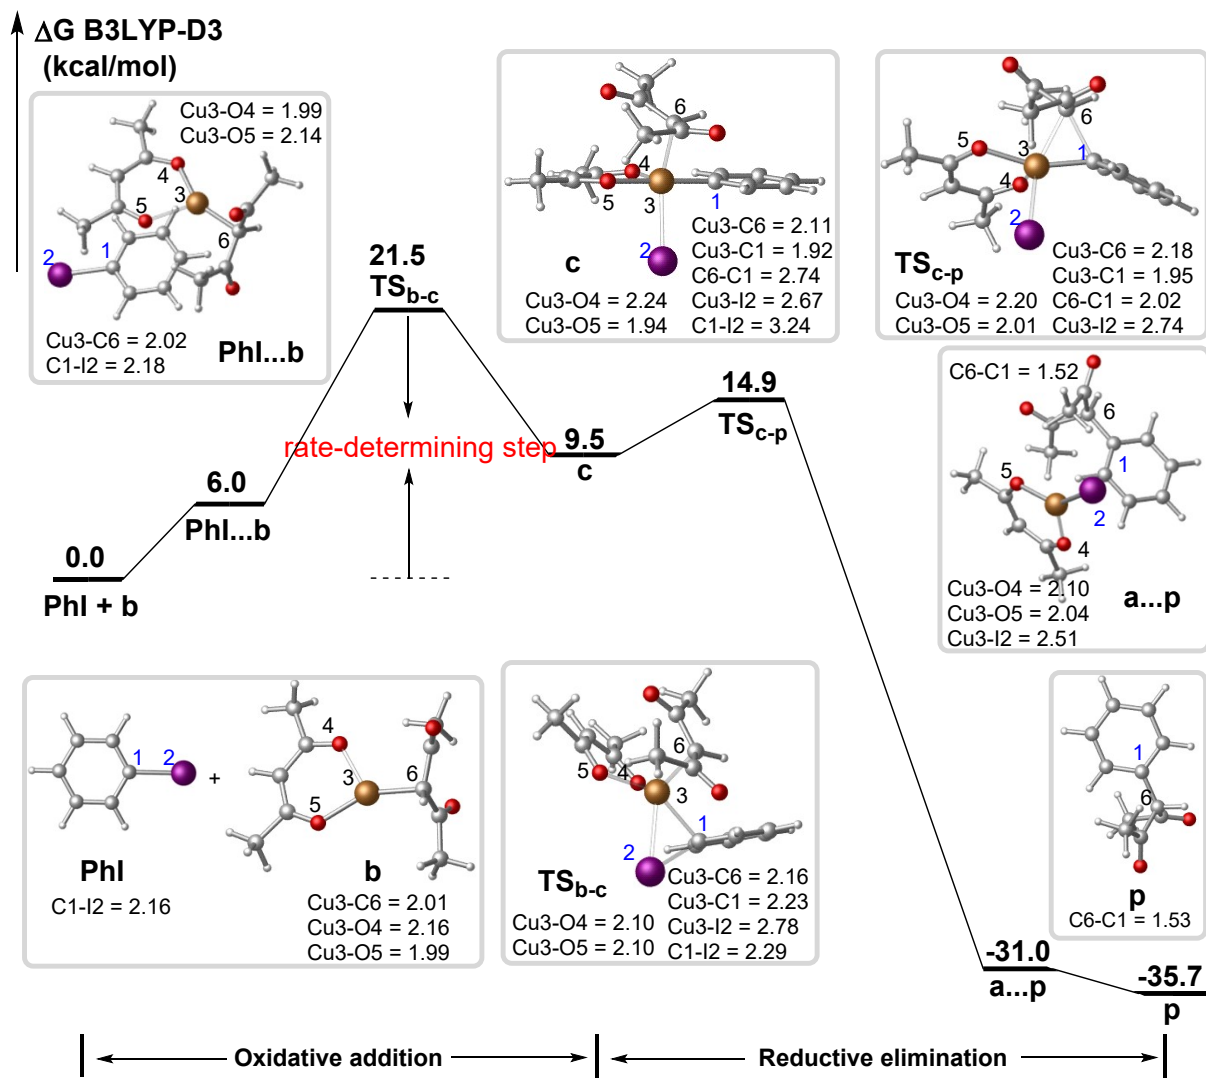

**Figure S16.** The Gibbs free energy profiles for the OA-RE pathway (H: small & white, C: gray, O: red, Cu: yellow, I: purple). Important bond lengths were displayed in Å.

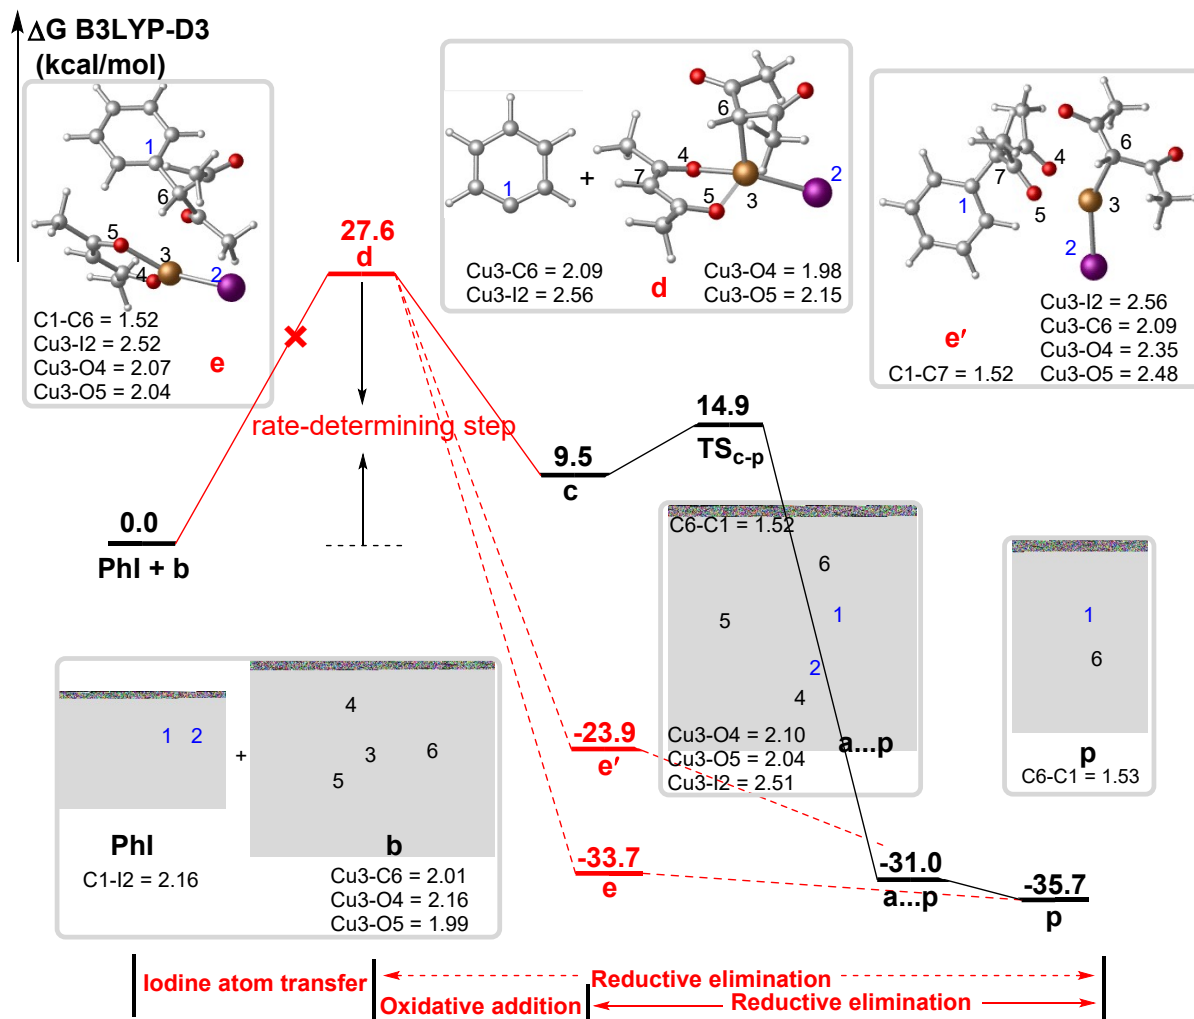

**Figure S17.** The Gibbs free energy profiles for the IAT pathway (H: small & white, C: gray, O: red, Cu: yellow, I: purple). Important bond lengths were displayed in Å.

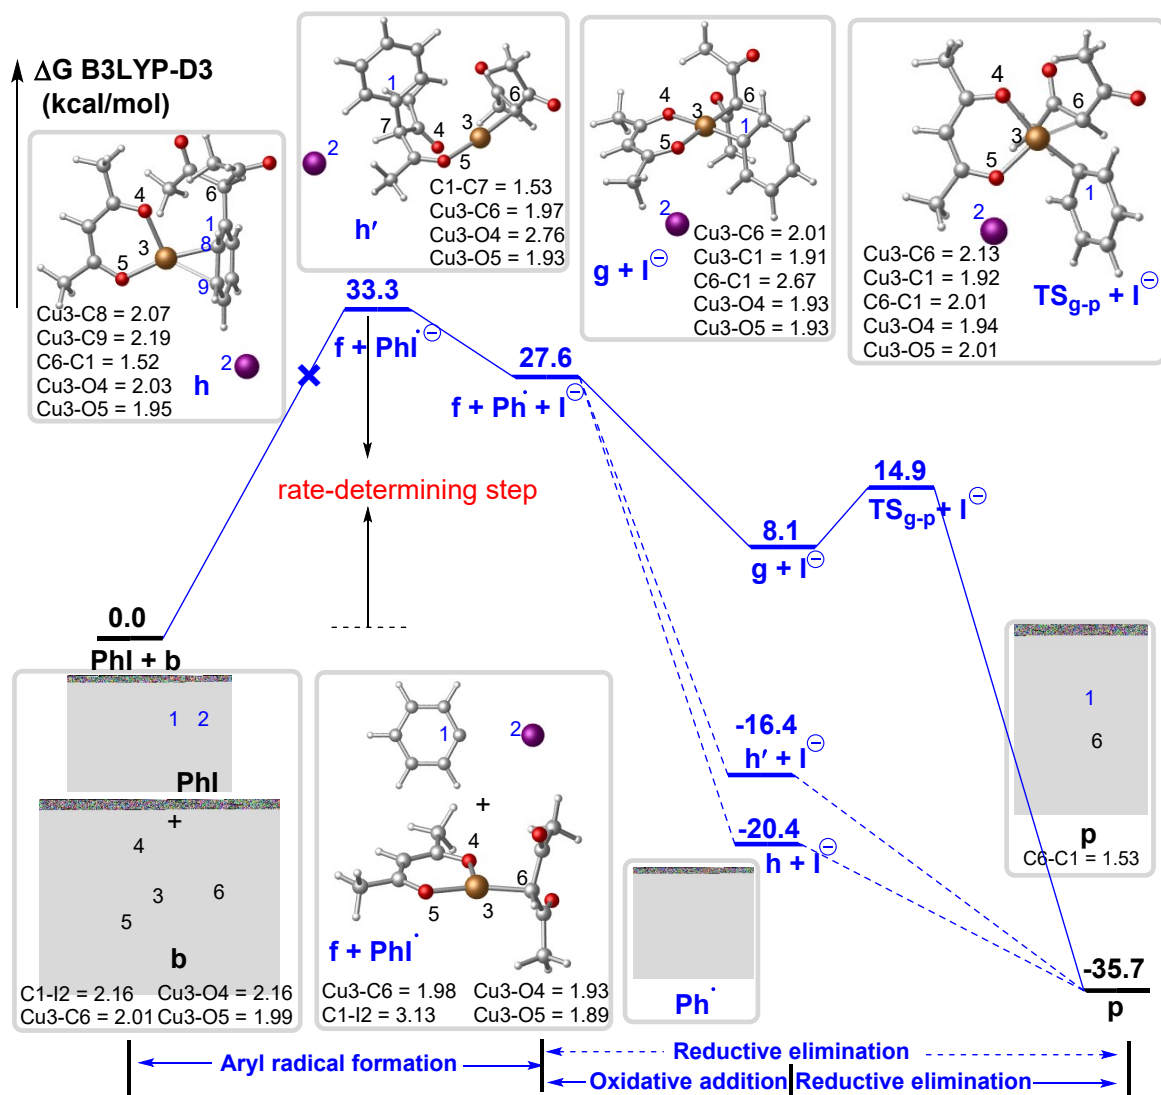

**Figure S18.** The Gibbs free energy profiles for the SET pathway (H: small & white, C: gray, O: red, Cu: yellow, I: purple). Important bond lengths were displayed in Å.

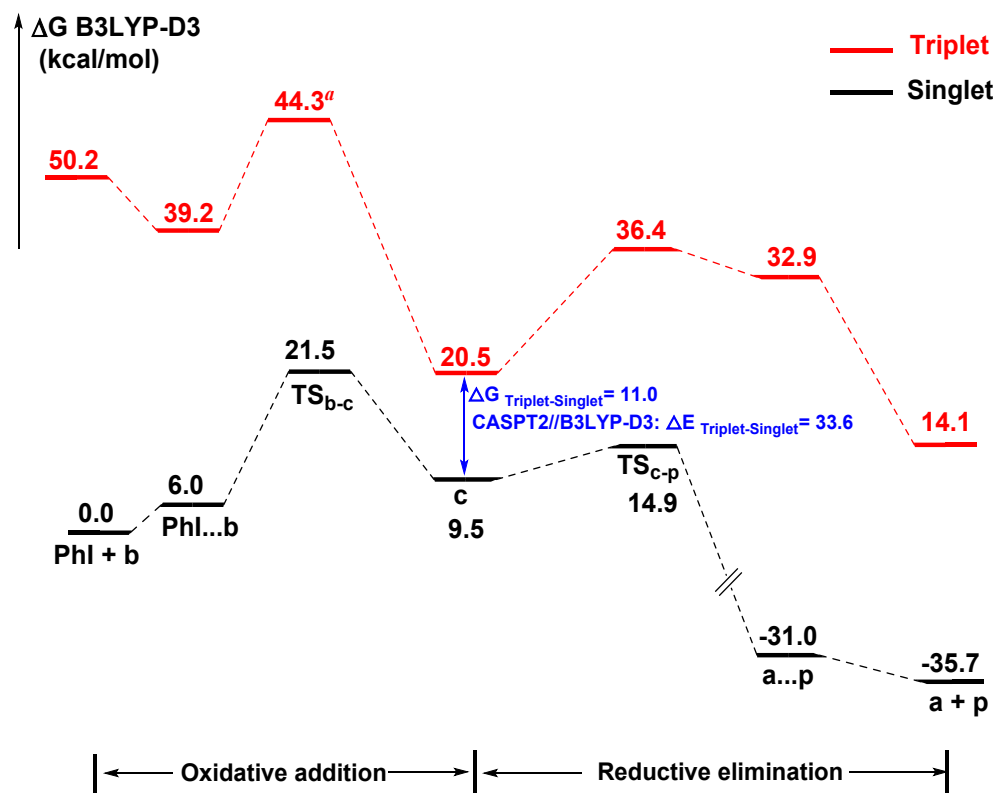

**Figure S19.** Gibbs free energy profiles for the OA-RE pathway in the singlet and the triplet spin states. <sup>a</sup> We took the geometry of TS<sub>b-c</sub> in the singlet spin state to evaluate the single-point energy in the triplet spin state, because TS<sub>b-c</sub> in the triplet spin state could not be located.



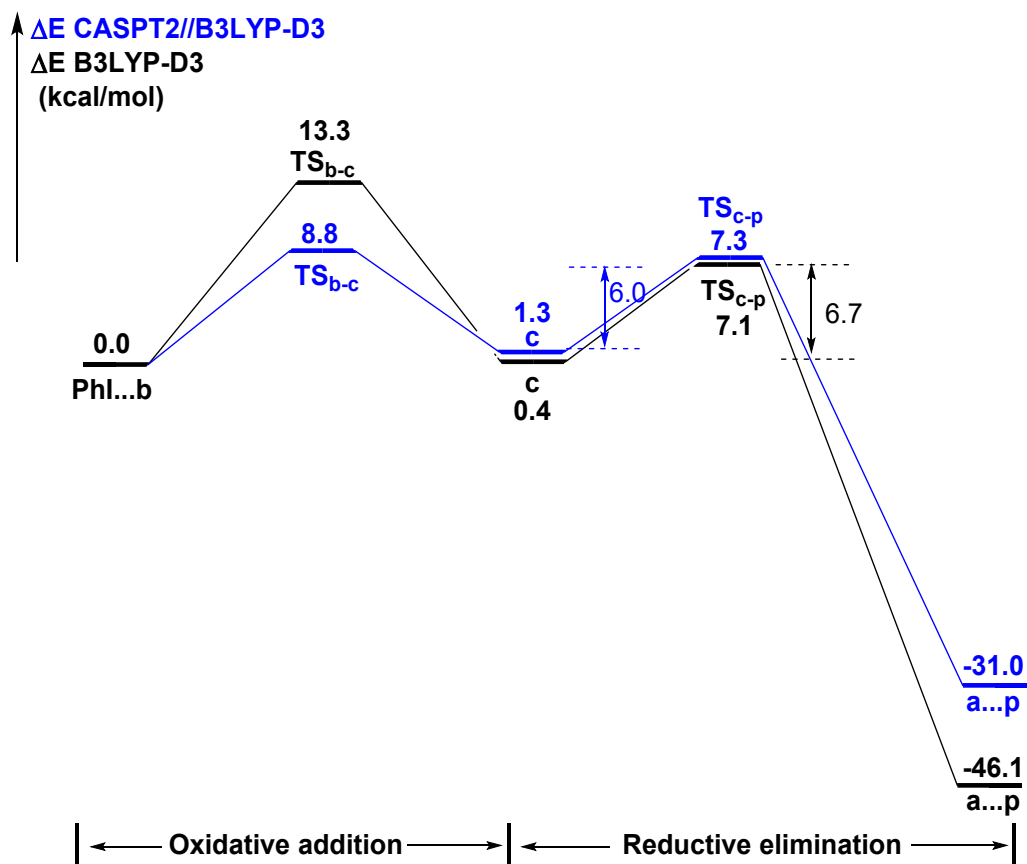

**Figure S20.** Electronic energy profile of OA-RE mechanism calculated by B3LYP-D3 (black) and CASPT2//B3LYP-D3 method (blue).

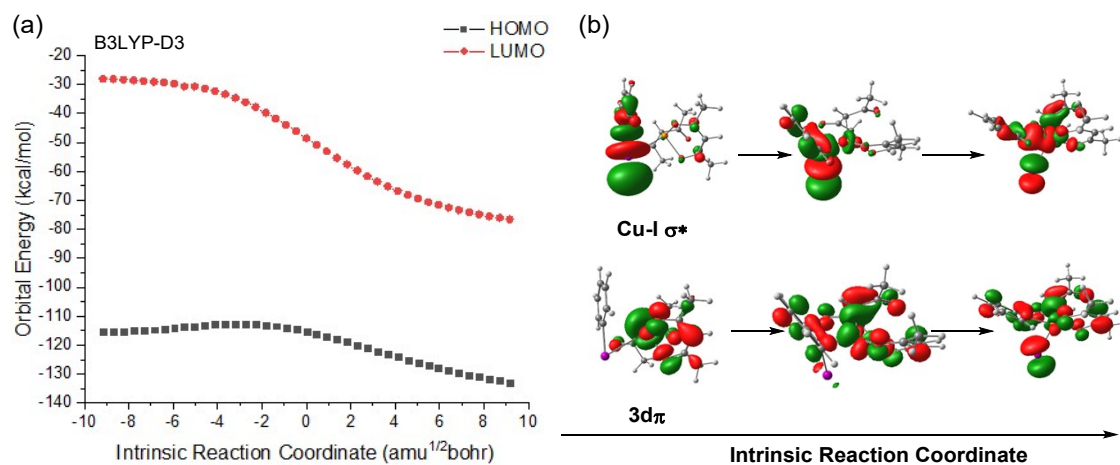

**Figure S21.** Change in the HOMO and LUMO calculated by B3LYP-D3 functional along the IRC of TS<sub>b-c</sub> in the OA step.

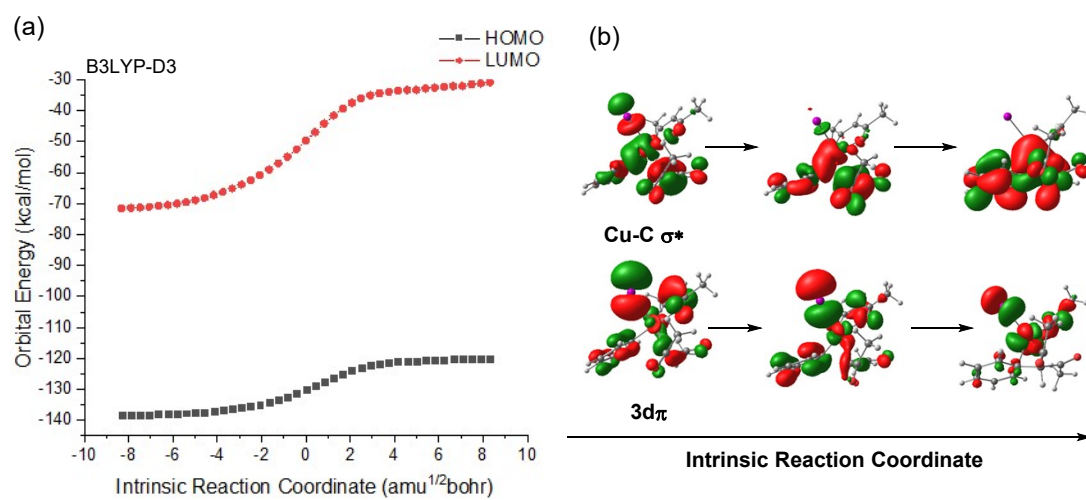

**Figure S22.** Change in the HOMO and LUMO calculated by B3LYP-D3 functional along the IRC of TS<sub>c-p</sub> in the RE step.

## 10. $\omega$ -B97XD-optimised geometries (singlet spin state)

### Complex a

|    |             |             |             |
|----|-------------|-------------|-------------|
| C  | -2.59687500 | -1.25090800 | -0.00037300 |
| C  | -3.24516500 | 0.00007500  | -0.00084400 |
| H  | -4.33074100 | 0.00016900  | -0.00132300 |
| C  | -3.46674800 | -2.50332400 | 0.00008700  |
| H  | -3.22812200 | -3.10316800 | 0.88523000  |
| H  | -4.53894800 | -2.28376100 | -0.00578000 |
| H  | -3.21953700 | -3.10990600 | -0.87803000 |
| C  | -2.59667600 | 1.25092000  | -0.00016600 |
| C  | -3.46627500 | 2.50351100  | 0.00004000  |
| H  | -3.22259500 | 3.10729000  | -0.88101500 |
| H  | -4.53853600 | 2.28416300  | -0.00085300 |
| H  | -3.22384200 | 3.10607200  | 0.88227700  |
| O  | -1.35659600 | -1.45997600 | 0.00028100  |
| O  | -1.35633100 | 1.45976400  | 0.00040700  |
| Cu | 0.08314700  | 0.00010400  | 0.00025500  |
| I  | 2.60047000  | -0.00007200 | -0.00011100 |

### Complex b

|    |             |             |             |
|----|-------------|-------------|-------------|
| O  | 1.54633800  | -1.45129800 | -0.36568200 |
| O  | 1.04257300  | 1.36444100  | 0.17360100  |
| C  | 2.72716300  | -1.05787600 | -0.14610500 |
| C  | 2.28609600  | 1.35831700  | 0.32190700  |
| C  | 2.91919700  | 2.69778900  | 0.68310600  |
| H  | 2.45407600  | 3.07617900  | 1.59962600  |
| H  | 4.00240200  | 2.63776200  | 0.82755500  |
| H  | 2.70202300  | 3.42027500  | -0.11113400 |
| C  | 3.79026100  | -2.14298300 | -0.25627800 |
| H  | 3.72089000  | -2.61322300 | -1.24302700 |
| H  | 4.80588900  | -1.76395000 | -0.10778400 |
| H  | 3.58682900  | -2.92080800 | 0.48829300  |
| C  | 3.14240500  | 0.24107400  | 0.18195100  |
| H  | 4.20424200  | 0.40112400  | 0.33993700  |
| Cu | -0.12073900 | -0.36067900 | -0.32240500 |
| C  | -2.10917000 | -0.24960800 | -0.52990900 |
| H  | -2.27277100 | -0.76807500 | -1.47947700 |
| C  | -2.38668400 | 1.19155700  | -0.66800400 |
| C  | -2.49675600 | -1.04337100 | 0.63193000  |
| O  | -2.61053000 | 1.69676000  | -1.76707500 |
| O  | -2.76458000 | -0.63534800 | 1.76625400  |
| C  | -2.33588900 | 2.07575500  | 0.56722300  |
| H  | -2.78586700 | 1.57273300  | 1.42624100  |
| H  | -1.28193600 | 2.26062700  | 0.80829700  |

|   |             |             |             |
|---|-------------|-------------|-------------|
| H | -2.82557100 | 3.02828500  | 0.34372000  |
| C | -2.62095500 | -2.55275400 | 0.38027900  |
| H | -2.08604700 | -2.88155900 | -0.51534300 |
| H | -2.24267500 | -3.09331900 | 1.25260400  |
| H | -3.68446600 | -2.80021300 | 0.26685500  |

### Complex PhI...b

|    |             |             |             |
|----|-------------|-------------|-------------|
| O  | 1.50512000  | 2.29610300  | -0.67329400 |
| O  | 0.77392700  | 0.28799400  | 1.30866300  |
| C  | 0.45119000  | 2.81935400  | -0.20530200 |
| C  | -0.17516400 | 1.08611800  | 1.48642500  |
| C  | -1.20102300 | 0.67256900  | 2.53047800  |
| H  | -0.70218000 | 0.56606700  | 3.50007900  |
| H  | -2.03022200 | 1.37965100  | 2.62521000  |
| H  | -1.60113200 | -0.30902700 | 2.25729300  |
| C  | 0.04701600  | 4.12979500  | -0.86658800 |
| H  | -0.15489400 | 3.94545800  | -1.92842900 |
| H  | -0.83747300 | 4.58523200  | -0.41146800 |
| H  | 0.88295200  | 4.83554000  | -0.81570600 |
| C  | -0.37014400 | 2.31564700  | 0.81092300  |
| H  | -1.24897600 | 2.89428500  | 1.07648500  |
| Cu | 2.27422200  | 0.52916500  | -0.14891500 |
| C  | 3.68036700  | -0.87736300 | -0.45953700 |
| H  | 3.88978300  | -0.78734100 | -1.52926900 |
| C  | 2.97338700  | -2.12725700 | -0.16143500 |
| C  | 4.73144600  | -0.31514500 | 0.38534000  |
| O  | 2.54755400  | -2.85236900 | -1.06871500 |
| O  | 4.95660600  | -0.57230400 | 1.57033200  |
| C  | 2.68792100  | -2.49958300 | 1.28055200  |
| H  | 3.54012100  | -2.26201400 | 1.92136300  |
| H  | 1.84288500  | -1.89085100 | 1.62679400  |
| H  | 2.41887700  | -3.55909900 | 1.32931700  |
| C  | 5.67251900  | 0.67294500  | -0.31615300 |
| H  | 5.23715900  | 1.10523000  | -1.22173900 |
| H  | 5.93600900  | 1.47184400  | 0.38259500  |
| H  | 6.59651500  | 0.14553700  | -0.58646100 |
| C  | -0.49536500 | -2.06187700 | -0.90786300 |
| C  | 0.06695500  | -1.10190100 | -1.74525700 |
| C  | -0.62759500 | 0.07026300  | -2.02386200 |
| C  | -1.88989700 | 0.29110900  | -1.47617800 |
| C  | -2.43842700 | -0.68841300 | -0.66024900 |
| C  | -1.75991900 | -1.86419900 | -0.35955200 |
| H  | 0.08451000  | -2.94801100 | -0.66999000 |
| H  | 1.06070600  | -1.27897400 | -2.14389000 |
| H  | -0.17021900 | 0.84111800  | -2.63604100 |

|   |             |             |             |
|---|-------------|-------------|-------------|
| H | -2.41610000 | 1.21927100  | -1.66679100 |
| H | -2.19719000 | -2.60721700 | 0.29879800  |
| I | -4.38620400 | -0.36038200 | 0.18762300  |

### Complex TS<sub>b-c</sub>

|    |             |             |             |
|----|-------------|-------------|-------------|
| Cu | -0.11385600 | 0.01630400  | 0.12431800  |
| C  | -1.99880500 | -0.00599800 | -1.99611600 |
| C  | -0.62052900 | 0.44389500  | -1.95773600 |
| C  | -0.21967900 | 1.84100800  | -2.04098200 |
| O  | -3.00810400 | 0.69217800  | -1.85773400 |
| O  | 0.90627600  | 2.17906200  | -2.43740600 |
| H  | 0.08269400  | -0.23797100 | -2.43411800 |
| C  | 1.87701000  | -0.59379400 | -0.10638800 |
| C  | 2.00125800  | -1.87036700 | 0.44422000  |
| C  | 2.63497600  | -2.86295000 | -0.29960500 |
| C  | 3.17150900  | -2.57458700 | -1.55078600 |
| C  | 3.06812800  | -1.28137300 | -2.06550800 |
| C  | 2.44289300  | -0.27225800 | -1.34197900 |
| I  | 1.81725400  | 1.15923400  | 1.47477300  |
| H  | 1.57067800  | -2.09412200 | 1.41166400  |
| H  | 2.71026800  | -3.86551100 | 0.11333100  |
| H  | 3.67355600  | -3.35129000 | -2.12164900 |
| H  | 3.47622800  | -1.04913200 | -3.04565600 |
| H  | 2.30861600  | 0.72131800  | -1.76516000 |
| C  | -1.19273800 | 2.91623200  | -1.59080700 |
| C  | -2.19088700 | -1.50345500 | -2.25677600 |
| H  | -0.68135500 | 3.88238900  | -1.62312700 |
| H  | -1.55593500 | 2.69919700  | -0.58131100 |
| H  | -2.07467100 | 2.92146900  | -2.23831100 |
| H  | -1.33074800 | -2.09604200 | -1.93062400 |
| H  | -2.34252900 | -1.66610800 | -3.33192500 |
| H  | -3.08788400 | -1.83686200 | -1.72793300 |
| O  | -1.72428900 | 0.92686700  | 1.03078500  |
| O  | -0.85950000 | -1.82266800 | 0.88446400  |
| C  | -2.84125200 | 0.37005000  | 1.18711500  |
| C  | -2.08538200 | -2.00688900 | 1.12376100  |
| C  | -2.51328700 | -3.46506200 | 1.21933400  |
| H  | -1.84561300 | -3.99550500 | 1.90629600  |
| H  | -3.54873900 | -3.58880000 | 1.55071900  |
| H  | -2.39967500 | -3.92726900 | 0.23155100  |
| C  | -4.03583400 | 1.30086700  | 1.24578900  |
| H  | -4.23374600 | 1.61235100  | 0.21391400  |
| H  | -4.93194100 | 0.82577800  | 1.65696900  |
| H  | -3.78262500 | 2.19025700  | 1.83068400  |
| C  | -3.07088000 | -1.02052000 | 1.27395600  |

|   |             |             |            |
|---|-------------|-------------|------------|
| H | -4.09327400 | -1.34865800 | 1.43064400 |
|---|-------------|-------------|------------|

**Complex c**

|    |             |             |             |
|----|-------------|-------------|-------------|
| Cu | -0.01526900 | 0.10575900  | -0.13507500 |
| C  | 1.26447300  | 2.48079500  | 0.66821600  |
| C  | 0.05378100  | 2.16022600  | -0.14177300 |
| C  | -0.02427500 | 2.51945400  | -1.59336100 |
| O  | 2.38297900  | 2.66887500  | 0.21426000  |
| O  | -1.10532400 | 2.84103800  | -2.07297100 |
| H  | -0.84520600 | 2.51989800  | 0.35246200  |
| C  | -1.82060700 | 0.37672000  | 0.42300200  |
| C  | -2.08610700 | 0.14200400  | 1.76727200  |
| C  | -3.39118200 | 0.29758000  | 2.23902400  |
| C  | -4.41274600 | 0.68653900  | 1.37799200  |
| C  | -4.12560300 | 0.92169600  | 0.03445100  |
| C  | -2.82785200 | 0.77099200  | -0.44947400 |
| H  | -1.29023100 | -0.17926600 | 2.43029700  |
| H  | -3.60283200 | 0.10689400  | 3.28884900  |
| H  | -5.42703400 | 0.80716600  | 1.75057800  |
| H  | -4.91426100 | 1.22839300  | -0.64828800 |
| H  | -2.60580500 | 0.97994800  | -1.48976400 |
| C  | 1.21390500  | 2.49017500  | -2.45828300 |
| C  | 1.01046800  | 2.60086200  | 2.16188400  |
| H  | 1.94157000  | 3.21744500  | -2.08688300 |
| H  | 0.92594100  | 2.71773900  | -3.48755600 |
| H  | 1.69435100  | 1.51091700  | -2.38452800 |
| H  | 1.95175000  | 2.81616400  | 2.67273400  |
| H  | 0.58918800  | 1.66325200  | 2.53753100  |
| H  | 0.28841200  | 3.40207500  | 2.36037600  |
| O  | 1.77916700  | -0.05557700 | -0.86515900 |
| O  | 0.83165400  | -0.52183200 | 1.83807800  |
| C  | 2.83426500  | -0.51165900 | -0.33227600 |
| C  | 1.98438000  | -0.99732000 | 1.96055300  |
| C  | 2.30917900  | -1.62129500 | 3.30950300  |
| H  | 3.37358400  | -1.83929200 | 3.43693600  |
| H  | 1.97541100  | -0.94920400 | 4.10637300  |
| H  | 1.74376200  | -2.55505400 | 3.40650500  |
| C  | 4.03967500  | -0.48487900 | -1.24911900 |
| H  | 4.26105200  | 0.56164500  | -1.48612700 |
| H  | 4.92414800  | -0.94705300 | -0.80229000 |
| H  | 3.79251700  | -0.99527000 | -2.18534900 |
| C  | 2.98704500  | -1.00407700 | 0.96706100  |
| H  | 3.95929000  | -1.40281300 | 1.23498500  |
| I  | -0.70666800 | -2.26712300 | -1.02096900 |

**Complex TS<sub>c-p</sub>**

|    |             |             |             |
|----|-------------|-------------|-------------|
| Cu | 0.02601000  | 0.17067200  | 0.05693100  |
| C  | -0.03365300 | 2.87113600  | 0.29735000  |
| C  | -1.11046600 | 1.89376700  | -0.15948100 |
| C  | -1.45497800 | 1.99278400  | -1.64020500 |
| O  | 0.46703100  | 3.65851700  | -0.48058100 |
| O  | -2.58303900 | 2.32951900  | -1.95157300 |
| H  | -2.01000800 | 2.20207700  | 0.37396300  |
| C  | -1.80723600 | 0.09085300  | 0.61883400  |
| C  | -1.94904200 | 0.04418100  | 2.00768200  |
| C  | -3.06229400 | -0.58103400 | 2.56448900  |
| C  | -4.04788700 | -1.12791500 | 1.74805400  |
| C  | -3.91141700 | -1.05101300 | 0.36329100  |
| C  | -2.80344200 | -0.43351300 | -0.20522000 |
| I  | 0.32484900  | -2.20955600 | -1.23990300 |
| H  | -1.17274200 | 0.44568800  | 2.64864900  |
| H  | -3.15425500 | -0.63958100 | 3.64629200  |
| H  | -4.91775700 | -1.60954600 | 2.18650600  |
| H  | -4.66973800 | -1.47989000 | -0.28611700 |
| H  | -2.70488200 | -0.38818500 | -1.28352400 |
| C  | -0.42219100 | 1.63013000  | -2.67286700 |
| C  | 0.27293800  | 2.90687900  | 1.77712200  |
| H  | 0.57562900  | 1.95062300  | -2.36960500 |
| H  | -0.71079800 | 2.06474700  | -3.63291100 |
| H  | -0.38918800 | 0.53581200  | -2.76809400 |
| H  | 0.87001200  | 3.79386200  | 1.99993500  |
| H  | 0.81982000  | 1.99975100  | 2.05673400  |
| H  | -0.65627200 | 2.92105900  | 2.35899000  |
| O  | 1.78480800  | 0.94967200  | -0.53957200 |
| O  | 1.01379400  | -0.21760100 | 1.96602100  |
| C  | 2.92684300  | 0.60948700  | -0.11946800 |
| C  | 2.24689900  | -0.46495300 | 2.02074800  |
| C  | 2.70604200  | -1.26835500 | 3.22637800  |
| H  | 3.79479800  | -1.31774500 | 3.32240500  |
| H  | 2.27598400  | -0.83752400 | 4.13640700  |
| H  | 2.31216900  | -2.28589700 | 3.12588200  |
| C  | 4.07558800  | 0.97954700  | -1.03798600 |
| H  | 3.98984700  | 2.03674200  | -1.30875000 |
| H  | 5.05675800  | 0.79301700  | -0.59201400 |
| H  | 3.98255500  | 0.39436600  | -1.95957100 |
| C  | 3.21235300  | -0.06807200 | 1.07541600  |
| H  | 4.24769700  | -0.32672500 | 1.26950500  |

**Complex p**

|   |            |             |             |
|---|------------|-------------|-------------|
| C | 0.86584300 | -0.02724000 | -0.57222900 |
|---|------------|-------------|-------------|

|   |             |             |             |
|---|-------------|-------------|-------------|
| H | 1.00095500  | 0.00119200  | -1.65816300 |
| C | 1.54874400  | -1.33333100 | -0.11921900 |
| C | 1.55101800  | 1.21201300  | 0.01681200  |
| O | 2.24481500  | -1.92955500 | -0.91061400 |
| O | 2.04187100  | 1.21863600  | 1.12543100  |
| C | 1.32329200  | -1.80996100 | 1.29140200  |
| H | 1.62766800  | -1.02254700 | 1.98819100  |
| H | 0.25976400  | -2.00796700 | 1.46016100  |
| H | 1.90201300  | -2.71844500 | 1.46352300  |
| C | 1.54509500  | 2.43305300  | -0.87164000 |
| H | 0.54558000  | 2.59655800  | -1.28856500 |
| H | 1.86985600  | 3.30858500  | -0.30766200 |
| H | 2.22806500  | 2.26885000  | -1.71368300 |
| C | -0.62651900 | 0.01246800  | -0.27067100 |
| C | -1.52944800 | -0.42619600 | -1.24204900 |
| C | -1.11989700 | 0.45003000  | 0.96156600  |
| C | -2.89714500 | -0.43104500 | -0.98894000 |
| H | -1.15500400 | -0.77274400 | -2.20200400 |
| C | -2.48840900 | 0.44814500  | 1.21341900  |
| H | -0.43077200 | 0.79226500  | 1.72819600  |
| C | -3.38087200 | 0.00802700  | 0.24037700  |
| H | -3.58588000 | -0.77658100 | -1.75400800 |
| H | -2.85748500 | 0.79447100  | 2.17423600  |
| H | -4.44846200 | 0.00794100  | 0.43826800  |

### Complex d

|    |             |             |             |
|----|-------------|-------------|-------------|
| O  | -1.18592200 | -1.74615200 | 0.68226500  |
| O  | -1.43976700 | -0.03403300 | -1.61653500 |
| C  | -2.44316900 | -1.63914900 | 0.65921400  |
| C  | -2.66166700 | -0.10524400 | -1.30124900 |
| C  | -3.59630900 | 0.72693000  | -2.15219400 |
| H  | -3.37421700 | 0.56032500  | -3.21075000 |
| H  | -4.65279300 | 0.51804700  | -1.95944800 |
| H  | -3.38393700 | 1.77744800  | -1.92500000 |
| C  | -3.18582500 | -2.43774300 | 1.71857800  |
| H  | -2.81214500 | -2.14926600 | 2.70693900  |
| H  | -4.26924200 | -2.29143500 | 1.68388900  |
| H  | -2.96344600 | -3.50202800 | 1.58530800  |
| C  | -3.19658300 | -0.85684700 | -0.23647500 |
| H  | -4.27260800 | -0.83359600 | -0.10112300 |
| Cu | 0.02160100  | -0.31719100 | -0.25990200 |
| C  | -0.42517500 | 1.31552500  | 0.87648400  |
| H  | -1.43949000 | 0.99512000  | 1.13517100  |
| C  | -0.47793800 | 2.48660700  | -0.03680300 |
| C  | 0.48311100  | 1.28820100  | 2.04578700  |
| O  | -1.55557300 | 2.91775600  | -0.43110600 |



|   |             |             |             |
|---|-------------|-------------|-------------|
| O | 1.43068000  | 2.04215100  | 2.22261600  |
| C | 0.82023800  | 3.09978500  | -0.51043800 |
| H | 1.44565200  | 3.35697200  | 0.34830100  |
| H | 1.37987600  | 2.35718400  | -1.09209700 |
| H | 0.60269100  | 3.97333900  | -1.12995300 |
| C | 0.14188700  | 0.23674700  | 3.09507400  |
| H | -0.00135500 | -0.74576600 | 2.63331900  |
| H | 0.94020700  | 0.19580300  | 3.83893500  |
| H | -0.80101800 | 0.50546300  | 3.58904300  |
| I | 2.49488000  | -0.86124000 | -0.61077700 |

### Complex e

|    |             |             |             |
|----|-------------|-------------|-------------|
| O  | 0.65583200  | 2.91348400  | -0.57297300 |
| O  | -0.12861400 | 1.01350800  | 1.49851200  |
| C  | -0.42236800 | 3.44750700  | -0.18588800 |
| C  | -1.11877500 | 1.79218700  | 1.55965300  |
| C  | -2.24231800 | 1.36095900  | 2.48232100  |
| H  | -1.82345300 | 0.98266100  | 3.41923800  |
| H  | -2.95445100 | 2.16512200  | 2.68994300  |
| H  | -2.77511300 | 0.52653800  | 2.01107600  |
| C  | -0.81151300 | 4.71651000  | -0.93070300 |
| H  | -0.96680800 | 4.47731700  | -1.98893800 |
| H  | -1.71804900 | 5.18338700  | -0.53459500 |
| H  | 0.01525800  | 5.43265600  | -0.87994500 |
| C  | -1.28768100 | 2.97998100  | 0.81648300  |
| H  | -2.19631000 | 3.54611200  | 0.99249100  |
| Cu | 1.42662800  | 1.19707000  | 0.13301900  |
| C  | -0.88973700 | -1.66889200 | 0.08244000  |
| H  | -0.02316500 | -1.01206100 | -0.06041900 |
| C  | -1.00473900 | -1.95290300 | 1.58608500  |
| C  | -0.59508600 | -2.97213100 | -0.66962800 |
| O  | -2.06966200 | -2.00706000 | 2.16257300  |
| O  | -0.86916300 | -4.05872500 | -0.20199800 |
| C  | 0.31274100  | -2.13740800 | 2.29265600  |
| H  | 0.99564200  | -2.76206100 | 1.70866600  |
| H  | 0.77561400  | -1.14786200 | 2.38401800  |
| H  | 0.14895800  | -2.56820000 | 3.28273300  |
| C  | 0.04916700  | -2.80238800 | -2.02313100 |
| H  | 1.05543400  | -2.38516500 | -1.88560400 |
| H  | 0.10737000  | -3.76463800 | -2.53574300 |
| H  | -0.51570600 | -2.08169600 | -2.62434300 |
| I  | 3.21415400  | -0.49529600 | -0.33392400 |
| C  | -3.10906400 | 0.86564800  | -1.68669500 |
| C  | -1.99192900 | 0.24206700  | -1.13798300 |
| C  | -2.10736600 | -1.00439300 | -0.52056400 |
| C  | -3.35796900 | -1.62920300 | -0.47765000 |

|   |             |             |             |
|---|-------------|-------------|-------------|
| C | -4.47268600 | -1.00775400 | -1.03121100 |
| C | -4.35229900 | 0.24295100  | -1.63483200 |
| H | -3.00111100 | 1.84549000  | -2.14301000 |
| H | -1.02625700 | 0.74002800  | -1.16796300 |
| H | -3.45083400 | -2.59736100 | 0.00243500  |
| H | -5.44061400 | -1.50010200 | -0.98593300 |
| H | -5.22619700 | 0.72939100  | -2.06068000 |

**Complex e'**

|    |             |             |             |
|----|-------------|-------------|-------------|
| O  | 0.59837900  | -0.35824400 | 1.61191900  |
| O  | 0.54329800  | -0.54260900 | -1.38311100 |
| C  | 1.30836800  | -1.32185900 | 1.42545200  |
| C  | 1.31986400  | -1.44088300 | -1.13399500 |
| C  | 1.59680100  | -2.55972300 | -2.10571000 |
| H  | 1.06687300  | -2.37901400 | -3.04251600 |
| H  | 2.67449500  | -2.64591900 | -2.29008400 |
| H  | 1.23703500  | -3.48684500 | -1.64832800 |
| C  | 1.49601100  | -2.40306200 | 2.45944000  |
| H  | 1.08217300  | -3.32907600 | 2.05023400  |
| H  | 2.56263300  | -2.54690600 | 2.67155900  |
| H  | 0.96456200  | -2.13266200 | 3.37379000  |
| C  | 2.15700100  | -1.46475900 | 0.15188900  |
| H  | 2.67164800  | -2.42961500 | 0.19605700  |
| Cu | -1.27292200 | 0.23507000  | 0.00487200  |
| C  | -2.14953900 | -1.55204200 | 0.53521400  |
| H  | -1.81799600 | -1.51428700 | 1.57585600  |
| C  | -1.43343700 | -2.53433200 | -0.24265000 |
| C  | -3.56274200 | -1.21927600 | 0.34367800  |
| O  | -0.39233800 | -3.08140300 | 0.18029700  |
| O  | -4.25018300 | -1.47963100 | -0.64350700 |
| C  | -1.89375300 | -2.87444200 | -1.64747700 |
| H  | -2.98142900 | -2.94729200 | -1.70316700 |
| H  | -1.59771800 | -2.05707200 | -2.31621700 |
| H  | -1.40228900 | -3.79723300 | -1.96941700 |
| C  | -4.22268300 | -0.51749200 | 1.53229700  |
| H  | -3.55752500 | 0.22251700  | 1.98777000  |
| H  | -5.14106400 | -0.03084100 | 1.19669100  |
| H  | -4.47697500 | -1.26438200 | 2.29611200  |
| I  | -1.25716600 | 2.75523200  | -0.18226900 |
| C  | 3.77877000  | 1.98181800  | -0.04244300 |
| C  | 2.81137800  | 0.98450800  | 0.01744000  |
| C  | 3.19875200  | -0.35805000 | 0.09035500  |
| C  | 4.55753900  | -0.67816300 | 0.10143600  |
| C  | 5.52347000  | 0.32354600  | 0.04168500  |
| C  | 5.13450600  | 1.65797600  | -0.03054000 |
| H  | 3.46236600  | 3.01918300  | -0.10061800 |

|   |            |             |             |
|---|------------|-------------|-------------|
| H | 1.75754900 | 1.24659700  | 0.00743500  |
| H | 4.86240400 | -1.72130000 | 0.15855500  |
| H | 6.57788700 | 0.05966200  | 0.05196300  |
| H | 5.88478900 | 2.44268000  | -0.07791500 |

**Complex f**

|    |             |             |             |
|----|-------------|-------------|-------------|
| O  | -1.69473300 | -1.40746200 | -0.06046200 |
| O  | -0.77295400 | 1.27320600  | -0.13429400 |
| C  | -2.80853900 | -0.83539400 | 0.15850500  |
| C  | -2.00613300 | 1.51191800  | 0.09697400  |
| C  | -2.34957600 | 2.97713700  | 0.20376100  |
| H  | -2.06317700 | 3.48154100  | -0.72475100 |
| H  | -3.41145500 | 3.14690600  | 0.39286500  |
| H  | -1.76228300 | 3.42453200  | 1.01214500  |
| C  | -3.98231000 | -1.77012100 | 0.31735900  |
| H  | -3.75386700 | -2.50372600 | 1.09633000  |
| H  | -4.90686800 | -1.24618300 | 0.56861900  |
| H  | -4.12470400 | -2.32263200 | -0.61721400 |
| C  | -3.01078600 | 0.55149600  | 0.24878000  |
| H  | -4.01720800 | 0.90227300  | 0.44143900  |
| Cu | -0.02364300 | -0.48725300 | -0.28394000 |
| C  | 1.98586900  | 0.00654600  | -0.56024900 |
| H  | 1.73340400  | 0.14659000  | -1.61541100 |
| C  | 2.13960400  | -1.37515200 | -0.17207500 |
| C  | 2.62415300  | 1.13542100  | 0.12893000  |
| O  | 1.17081300  | -2.12302700 | -0.49564300 |
| O  | 3.22971000  | 1.01560000  | 1.18530500  |
| C  | 3.27038500  | -1.91676400 | 0.64020300  |
| H  | 4.21938200  | -1.73372100 | 0.12599600  |
| H  | 3.32226700  | -1.36118400 | 1.58086700  |
| H  | 3.12532800  | -2.98329200 | 0.81913800  |
| C  | 2.42840300  | 2.49089700  | -0.52060200 |
| H  | 1.35580500  | 2.70560600  | -0.58716900 |
| H  | 2.92814800  | 3.25841300  | 0.07284700  |
| H  | 2.83175800  | 2.49278100  | -1.54019600 |

**Complex g**

|   |             |             |             |
|---|-------------|-------------|-------------|
| O | 0.19195700  | 0.43948200  | 1.90934500  |
| O | -0.20854900 | -1.97288600 | 0.51327500  |
| C | 1.18588100  | -0.20139300 | 2.37512500  |
| C | 0.83365100  | -2.31940500 | 1.16562400  |
| C | 1.37039000  | -3.68210300 | 0.80894500  |
| H | 1.87853300  | -3.59243000 | -0.15817900 |
| H | 2.08611400  | -4.05428200 | 1.54614000  |
| H | 0.54626200  | -4.39161600 | 0.69167100  |

|    |             |             |             |
|----|-------------|-------------|-------------|
| C  | 2.10457600  | 0.60997400  | 3.24996700  |
| H  | 1.52410700  | 1.31339600  | 3.85250900  |
| H  | 2.73018800  | -0.01608300 | 3.89151400  |
| H  | 2.75406200  | 1.18220700  | 2.57587800  |
| C  | 1.50278700  | -1.54007100 | 2.10510300  |
| H  | 2.40372300  | -1.94395400 | 2.55020200  |
| Cu | -0.89751900 | -0.18067400 | 0.45311800  |
| C  | -2.22979700 | -0.63611100 | -0.92942600 |
| H  | -2.65476200 | 0.26317200  | -1.37411100 |
| C  | -3.31202200 | -1.32810800 | -0.13612800 |
| C  | -1.46790100 | -1.39375000 | -1.99578300 |
| O  | -4.26958900 | -0.67916700 | 0.26167600  |
| O  | -1.74261200 | -2.53912200 | -2.30290900 |
| C  | -3.20454200 | -2.80204000 | 0.17242300  |
| H  | -3.39746000 | -3.36490700 | -0.74511500 |
| H  | -2.18984200 | -3.05919900 | 0.48550400  |
| H  | -3.94004400 | -3.05518800 | 0.93956300  |
| C  | -0.38230300 | -0.62155600 | -2.70090800 |
| H  | 0.54227500  | -0.64864200 | -2.10461600 |
| H  | -0.17552100 | -1.07716700 | -3.67177400 |
| H  | -0.64304200 | 0.43545500  | -2.81800000 |
| C  | -1.91905000 | 4.31637700  | -0.01443800 |
| C  | -2.90656500 | 3.47934900  | 0.49955500  |
| C  | -2.69626300 | 2.10142200  | 0.57121000  |
| C  | -1.47857100 | 1.59159300  | 0.14354300  |
| C  | -0.47942700 | 2.40429000  | -0.38087800 |
| C  | -0.71264800 | 3.77804400  | -0.45643100 |
| H  | -2.09173800 | 5.38776300  | -0.07664000 |
| H  | -3.85318500 | 3.89340700  | 0.83805800  |
| H  | -3.48174800 | 1.43715800  | 0.91824900  |
| H  | 0.47939400  | 1.99447300  | -0.69707600 |
| H  | 0.06520000  | 4.42324400  | -0.85572900 |
| I  | 3.10239100  | 0.48277800  | -0.92159600 |

**Complex TS<sub>g-p</sub>**

|    |             |             |             |
|----|-------------|-------------|-------------|
| Cu | -0.73975800 | 0.35276700  | -0.43384000 |
| C  | -1.44110600 | 1.36495400  | 1.92864400  |
| C  | -2.19736800 | 0.39916600  | 1.00206600  |
| C  | -3.39897200 | 1.05318500  | 0.32958400  |
| O  | -1.84054100 | 2.50416400  | 2.06159200  |
| O  | -4.51819800 | 0.66800600  | 0.60398900  |
| H  | -2.60234400 | -0.36042300 | 1.67227200  |
| C  | -1.66788400 | -1.25002000 | -0.01780600 |
| C  | -0.80212100 | -2.15004600 | 0.61003500  |
| C  | -0.94527900 | -3.51190000 | 0.36317600  |
| C  | -1.95982100 | -3.97854500 | -0.46955300 |

|   |             |             |             |
|---|-------------|-------------|-------------|
| C | -2.83179100 | -3.07409500 | -1.07044100 |
| C | -2.69447900 | -1.70738800 | -0.84430000 |
| I | 2.93130100  | -0.80043700 | 1.00342800  |
| H | 0.01834100  | -1.79955600 | 1.23149700  |
| H | -0.24494400 | -4.20415200 | 0.82119800  |
| H | -2.07108100 | -5.04399300 | -0.65057200 |
| H | -3.62402200 | -3.42906300 | -1.72423700 |
| H | -3.38582500 | -1.01229000 | -1.31019700 |
| C | -3.16437500 | 2.12989600  | -0.70399700 |
| C | -0.29634000 | 0.80034000  | 2.72143500  |
| H | -2.38777700 | 2.82455400  | -0.37676900 |
| H | -4.10490900 | 2.65123200  | -0.89504900 |
| H | -2.82006300 | 1.66710100  | -1.63940400 |
| H | -0.03319300 | 1.49281800  | 3.52329900  |
| H | 0.58560000  | 0.64970100  | 2.08121100  |
| H | -0.55108800 | -0.18146000 | 3.13566800  |
| O | 0.08800400  | 2.11322400  | -0.36080200 |
| O | 0.19389000  | -0.19813500 | -2.07984800 |
| C | 1.14867300  | 2.39402900  | -1.00924100 |
| C | 1.25503300  | 0.37853300  | -2.46168400 |
| C | 2.11986700  | -0.41629400 | -3.41155000 |
| H | 2.76875200  | 0.21928600  | -4.02111100 |
| H | 2.75056900  | -1.06893100 | -2.79517500 |
| H | 1.49438400  | -1.04427400 | -4.05143100 |
| C | 1.85974500  | 3.64414400  | -0.54538200 |
| H | 2.38937100  | 3.39984000  | 0.38293300  |
| H | 2.58669400  | 4.01047100  | -1.27523800 |
| H | 1.12719600  | 4.42452200  | -0.31986700 |
| C | 1.71021600  | 1.64205900  | -2.04292400 |
| H | 2.64917700  | 1.99134400  | -2.45715200 |

### Complex h

|    |             |             |             |
|----|-------------|-------------|-------------|
| Cu | -0.95074400 | 0.81282500  | -0.96829300 |
| C  | -2.71081700 | -1.40009600 | 1.54430200  |
| C  | -1.85671900 | -2.35367500 | 0.68847600  |
| C  | -2.71490700 | -3.13483100 | -0.32240000 |
| O  | -3.90277800 | -1.60625300 | 1.65700800  |
| O  | -2.52581900 | -4.32340900 | -0.46559900 |
| H  | -1.50681800 | -3.11336900 | 1.40151600  |
| C  | -0.61596200 | -1.73224800 | 0.06630200  |
| C  | 0.55735700  | -1.66278500 | 0.80339500  |
| C  | 1.71360400  | -1.04457400 | 0.30427000  |
| C  | 1.70733400  | -0.47597700 | -0.95411900 |
| C  | 0.54064700  | -0.54837500 | -1.74541100 |
| C  | -0.61901900 | -1.19444500 | -1.25125000 |
| I  | 5.48604500  | -0.00709600 | 0.23080800  |

|   |             |             |             |
|---|-------------|-------------|-------------|
| H | 0.58454400  | -2.10534800 | 1.79666700  |
| H | 2.63295000  | -1.00986200 | 0.88325900  |
| H | 2.61520800  | -0.01022600 | -1.32683100 |
| H | 0.58383000  | -0.25187700 | -2.79121100 |
| H | -1.43912600 | -1.41659800 | -1.92971400 |
| C | -3.76485200 | -2.40045200 | -1.12930700 |
| C | -2.01793800 | -0.31075100 | 2.32541800  |
| H | -4.73668900 | -2.60256600 | -0.66743900 |
| H | -3.77578500 | -2.80673900 | -2.14497000 |
| H | -3.62427000 | -1.31629400 | -1.13223000 |
| H | -2.75868200 | 0.22592500  | 2.92068900  |
| H | -1.50314800 | 0.38894900  | 1.66138200  |
| H | -1.25572900 | -0.74329800 | 2.98399400  |
| O | -2.94628000 | 0.77324300  | -0.58961200 |
| O | -0.74525300 | 2.69045400  | -0.48806900 |
| C | -3.54365200 | 1.72573700  | -0.00230400 |
| C | -1.65536800 | 3.37528800  | 0.06606700  |
| C | -1.23556400 | 4.77304300  | 0.47486000  |
| H | -2.05327700 | 5.35370800  | 0.90934400  |
| H | -0.41855500 | 4.70102100  | 1.20037800  |
| H | -0.84195200 | 5.29774200  | -0.40140600 |
| C | -4.98627100 | 1.44967900  | 0.36546900  |
| H | -5.01605300 | 0.58054100  | 1.03224800  |
| H | -5.47328700 | 2.30023400  | 0.84965800  |
| H | -5.54222200 | 1.18230100  | -0.53958700 |
| C | -2.97748900 | 2.96690200  | 0.33296000  |
| H | -3.62103000 | 3.68302100  | 0.83174000  |

### Complex h'

|    |             |             |             |
|----|-------------|-------------|-------------|
| O  | 0.61616600  | 0.76109000  | -1.96544300 |
| O  | 0.49176500  | 2.04684300  | 0.58317300  |
| C  | -0.51610500 | 0.49292400  | -1.55766400 |
| C  | -0.14658000 | 1.06199200  | 0.91140200  |
| C  | -0.34040000 | 0.69425800  | 2.35860100  |
| H  | -0.34093200 | 1.60680200  | 2.95883400  |
| H  | -1.26184000 | 0.12784900  | 2.51682900  |
| H  | 0.51703500  | 0.07982400  | 2.66177900  |
| C  | -1.65568000 | 0.43265500  | -2.51925100 |
| H  | -1.31548700 | 0.63714700  | -3.53548300 |
| H  | -2.12799200 | -0.55440700 | -2.45947900 |
| H  | -2.43540600 | 1.13801900  | -2.20427900 |
| C  | -0.82581300 | 0.15813400  | -0.11016300 |
| H  | -1.90929600 | 0.32979100  | 0.04208800  |
| Cu | 2.25990900  | 0.95405000  | -0.95270300 |
| C  | 3.95669400  | 0.88892800  | 0.03251100  |
| H  | 4.44295600  | 1.84570600  | -0.18054200 |

|   |             |             |             |
|---|-------------|-------------|-------------|
| C | 4.72812500  | -0.21669100 | -0.58996200 |
| C | 3.41871000  | 0.81587700  | 1.39885300  |
| O | 5.60483600  | 0.01844300  | -1.41292100 |
| O | 3.05477600  | -0.21185300 | 1.97816800  |
| C | 4.40534400  | -1.65906100 | -0.23200300 |
| H | 4.27244100  | -1.78240400 | 0.84530300  |
| H | 3.45555000  | -1.94556800 | -0.70040100 |
| H | 5.19911200  | -2.30229700 | -0.61935300 |
| C | 3.32219200  | 2.14507500  | 2.13720800  |
| H | 3.06047200  | 2.96675700  | 1.46581500  |
| H | 2.57625800  | 2.06968300  | 2.93097500  |
| H | 4.29798000  | 2.36611600  | 2.58837400  |
| C | 0.90972900  | -3.18330300 | 0.55698500  |
| C | 0.69805700  | -1.81575100 | 0.41174100  |
| C | -0.57598000 | -1.33209100 | 0.10202900  |
| C | -1.63637400 | -2.22949700 | -0.04840000 |
| C | -1.41785400 | -3.59684300 | 0.09367400  |
| C | -0.14464300 | -4.07760000 | 0.38991100  |
| H | 1.90365200  | -3.54096100 | 0.81029300  |
| H | 1.52979900  | -1.13750000 | 0.59330900  |
| H | -2.63594000 | -1.84599400 | -0.24527300 |
| H | -2.25052700 | -4.28544000 | -0.01781000 |
| H | 0.02255800  | -5.14508200 | 0.50521800  |
| I | -4.63688000 | 0.55310000  | 0.11689700  |

**Complex a...p**

|    |             |             |             |
|----|-------------|-------------|-------------|
| Cu | -1.81571400 | 0.85948400  | 0.10369900  |
| C  | 2.58870900  | 0.15277600  | -1.83597400 |
| C  | 3.16228400  | -0.99622900 | -0.99750500 |
| C  | 4.29451600  | -0.47644800 | -0.09681400 |
| O  | 3.21270500  | 1.19265800  | -1.92912200 |
| O  | 5.44232200  | -0.80650100 | -0.30454300 |
| H  | 3.65106900  | -1.65683300 | -1.72697000 |
| C  | 2.14897800  | -1.80650000 | -0.21380300 |
| C  | 1.07499500  | -1.19518500 | 0.43610300  |
| C  | 0.17494400  | -1.94718500 | 1.18493700  |
| C  | 0.34848600  | -3.32420500 | 1.29788000  |
| C  | 1.42192200  | -3.94342700 | 0.66188200  |
| C  | 2.31643800  | -3.18797000 | -0.09052700 |
| I  | -3.70087900 | -0.68597600 | -0.44020200 |
| H  | 0.92569900  | -0.12249700 | 0.35340200  |
| H  | -0.66061400 | -1.44491000 | 1.66148700  |
| H  | -0.35920300 | -3.91348100 | 1.87360300  |
| H  | 1.56150300  | -5.01788500 | 0.74663800  |
| H  | 3.15604100  | -3.67160300 | -0.58513300 |
| C  | 3.90189500  | 0.39849200  | 1.07017100  |

|   |             |             |             |
|---|-------------|-------------|-------------|
| C | 1.29316700  | -0.06763100 | -2.57409500 |
| H | 3.15813800  | 1.14763800  | 0.78062600  |
| H | 4.79349500  | 0.87999400  | 1.47590100  |
| H | 3.44384300  | -0.22588900 | 1.84622200  |
| H | 1.36155000  | 0.41010000  | -3.55505400 |
| H | 0.48149900  | 0.42945100  | -2.02537000 |
| H | 1.03771400  | -1.12535300 | -2.67289100 |
| O | -0.77119000 | 1.08379000  | 1.88655100  |
| O | -0.55275400 | 2.15941900  | -0.81281300 |
| C | 0.26448500  | 1.78320900  | 2.03040800  |
| C | 0.41527900  | 2.76557300  | -0.27361000 |
| C | 1.18944500  | 3.70534400  | -1.18041400 |
| H | 1.83918100  | 4.38613500  | -0.62240600 |
| H | 1.81386600  | 3.10808300  | -1.85446800 |
| H | 0.48501400  | 4.28246900  | -1.78663400 |
| C | 0.94876100  | 1.67196600  | 3.38455700  |
| H | 1.36575300  | 0.66205400  | 3.47990600  |
| H | 1.75485800  | 2.39921100  | 3.51986700  |
| H | 0.20551500  | 1.79427200  | 4.17843300  |
| C | 0.85760300  | 2.61488100  | 1.05666100  |
| H | 1.72726700  | 3.19100000  | 1.35654500  |

#### Complex PhI

|   |             |             |             |
|---|-------------|-------------|-------------|
| C | -2.66651500 | 1.20749400  | -0.00000100 |
| C | -3.36684500 | 0.00000500  | 0.00000300  |
| C | -2.66655000 | -1.20747700 | -0.00000100 |
| C | -1.26884500 | -1.21676500 | -0.00000100 |
| C | -0.58793100 | -0.00001900 | -0.00000200 |
| C | -1.26883600 | 1.21676200  | -0.00000200 |
| H | -3.20369900 | 2.15213600  | 0.00000400  |
| H | -4.45306500 | 0.00003300  | 0.00000200  |
| H | -3.20371500 | -2.15213000 | 0.00000400  |
| H | -0.72680400 | -2.15608900 | -0.00000600 |
| H | -0.72675000 | 2.15606000  | -0.00000500 |
| I | 1.57107900  | 0.00000000  | 0.00000000  |

#### Complex PhI-radical

|   |             |             |             |
|---|-------------|-------------|-------------|
| C | -3.91980800 | -0.00010600 | -0.00032900 |
| C | -3.22250300 | 1.20859600  | -0.00017800 |
| C | -1.82366500 | 1.21262600  | 0.00012800  |
| C | -1.16064400 | 0.00010800  | 0.00028100  |
| C | -1.82347500 | -1.21251300 | 0.00012900  |
| C | -3.22231300 | -1.20870100 | -0.00017800 |
| H | -5.00765400 | -0.00019200 | -0.00057300 |
| H | -3.76981200 | 2.15012900  | -0.00029800 |
| H | -1.26719600 | 2.14663100  | 0.00024800  |



|   |             |             |             |
|---|-------------|-------------|-------------|
| H | -1.26685700 | -2.14642900 | 0.00024900  |
| H | -3.76947700 | -2.15031700 | -0.00029800 |
| I | 2.00217800  | 0.00000200  | 0.00002900  |

**Complex Ph-radical**

|   |             |             |             |
|---|-------------|-------------|-------------|
| C | 1.21071300  | 0.63068200  | 0.00000400  |
| C | 1.22337000  | -0.76916800 | -0.00000300 |
| C | 0.00000200  | -1.39771300 | 0.00000000  |
| C | -1.22337200 | -0.76916500 | 0.00000000  |
| C | -1.21071500 | 0.63067700  | -0.00000400 |
| C | 0.00000200  | 1.32124300  | 0.00000100  |
| H | 2.15027900  | 1.17670900  | 0.00000800  |
| H | 2.15932700  | -1.31993700 | 0.00000200  |
| H | -2.15932200 | -1.31994500 | 0.00000000  |
| H | -2.15027600 | 1.17671300  | -0.00000400 |
| H | -0.00000500 | 2.40712200  | 0.00000400  |

## 11. B3LYP-D3-optimised geometries (singlet spin state)

### Complex a

|    |             |             |             |
|----|-------------|-------------|-------------|
| C  | -2.61253700 | -1.25377300 | 0.00003500  |
| C  | -3.26196600 | -0.00017700 | 0.00021300  |
| H  | -4.34771700 | -0.00025500 | 0.00025300  |
| C  | -3.47917800 | -2.51256900 | -0.00005300 |
| H  | -3.23342800 | -3.11749100 | 0.88108500  |
| H  | -4.55404500 | -2.30112800 | 0.00006400  |
| H  | -3.23357600 | -3.11726000 | -0.88139000 |
| C  | -2.61275100 | 1.25350600  | 0.00033800  |
| C  | -3.47958900 | 2.51216500  | 0.00049100  |
| H  | -3.23399100 | 3.11712600  | -0.88066300 |
| H  | -4.55442400 | 2.30056400  | 0.00045000  |
| H  | -3.23401700 | 3.11689500  | 0.88181100  |
| O  | -1.36456300 | -1.46178600 | -0.00003100 |
| O  | -1.36480000 | 1.46178100  | 0.00031600  |
| Cu | 0.08052100  | 0.00034100  | 0.00001700  |
| I  | 2.61447400  | -0.00006100 | -0.00019900 |

### Complex b

|    |             |             |             |
|----|-------------|-------------|-------------|
| O  | 1.55895400  | -1.43801000 | -0.41755700 |
| O  | 1.01181500  | 1.37258800  | 0.12928000  |
| C  | 2.73573000  | -1.03368200 | -0.15317200 |
| C  | 2.25569400  | 1.37929000  | 0.32297800  |
| C  | 2.85777100  | 2.72576500  | 0.72508600  |
| H  | 2.35977900  | 3.08036100  | 1.63522200  |
| H  | 3.93872900  | 2.68756400  | 0.89903000  |
| H  | 2.64707800  | 3.46030700  | -0.06139000 |
| C  | 3.80864200  | -2.11534000 | -0.24063600 |
| H  | 3.80431800  | -2.54568900 | -1.24944700 |
| H  | 4.81478800  | -1.74758500 | -0.01330200 |
| H  | 3.55875700  | -2.92650400 | 0.45399700  |
| C  | 3.12791600  | 0.26843000  | 0.20047000  |
| H  | 4.18243300  | 0.43551800  | 0.39746600  |
| Cu | -0.12957400 | -0.39508100 | -0.37210300 |
| C  | -2.13148900 | -0.26624300 | -0.51757900 |
| H  | -2.35071600 | -0.79704600 | -1.44990700 |
| C  | -2.40069500 | 1.17908500  | -0.66602300 |
| C  | -2.46211400 | -1.03975700 | 0.68059500  |
| O  | -2.68207100 | 1.66746400  | -1.76541800 |
| O  | -2.68141300 | -0.60489100 | 1.82110800  |
| C  | -2.26409400 | 2.08613400  | 0.55045600  |
| H  | -2.72409000 | 1.63065400  | 1.43095400  |
| H  | -1.19495600 | 2.20490800  | 0.76578600  |
| H  | -2.69969300 | 3.06296200  | 0.31655200  |

|   |             |             |             |
|---|-------------|-------------|-------------|
| C | -2.58464400 | -2.56010600 | 0.46811100  |
| H | -2.09817600 | -2.90209000 | -0.45062400 |
| H | -2.14534100 | -3.07651700 | 1.32753700  |
| H | -3.64984700 | -2.82816700 | 0.42807700  |

**Complex PhI...b**

|    |             |             |             |
|----|-------------|-------------|-------------|
| O  | 1.65782600  | -2.30168800 | 0.66765300  |
| O  | 0.83268500  | -0.30270100 | -1.29908200 |
| C  | 0.63698800  | -2.88228900 | 0.17083200  |
| C  | -0.08283400 | -1.14463700 | -1.49031300 |
| C  | -1.15647500 | -0.74398000 | -2.49617600 |
| H  | -0.67599100 | -0.40457900 | -3.42053500 |
| H  | -1.86331800 | -1.54854400 | -2.72403500 |
| H  | -1.71525100 | 0.10376000  | -2.08454600 |
| C  | 0.32027200  | -4.23739100 | 0.79514700  |
| H  | 0.11926300  | -4.10210300 | 1.86560700  |
| H  | -0.53775200 | -4.73718700 | 0.33383000  |
| H  | 1.20013400  | -4.88677300 | 0.71611000  |
| C  | -0.20804000 | -2.40091700 | -0.83951700 |
| H  | -1.04993500 | -3.02447200 | -1.12301400 |
| Cu | 2.36678400  | -0.50968300 | 0.18485500  |
| C  | 3.68497600  | 0.99831000  | 0.47180600  |
| H  | 3.88055400  | 0.96320800  | 1.54825700  |
| C  | 2.90752300  | 2.19453400  | 0.11721700  |
| C  | 4.77831800  | 0.45596700  | -0.33856100 |
| O  | 2.41076700  | 2.91574300  | 0.99861700  |
| O  | 5.01151100  | 0.68763400  | -1.53260800 |
| C  | 2.63769600  | 2.50909700  | -1.34483600 |
| H  | 3.53515000  | 2.36305500  | -1.95061500 |
| H  | 1.88454700  | 1.79906000  | -1.70865000 |
| H  | 2.24882200  | 3.52936600  | -1.42372200 |
| C  | 5.75094900  | -0.47154800 | 0.41113200  |
| H  | 5.32217800  | -0.88188800 | 1.33072700  |
| H  | 6.04480800  | -1.29063400 | -0.25267000 |
| H  | 6.65829000  | 0.09432500  | 0.66461000  |
| C  | -0.58792500 | 2.04803100  | 0.91661200  |
| C  | 0.01949000  | 1.04287700  | 1.67230500  |
| C  | -0.64913100 | -0.15881500 | 1.90159400  |
| C  | -1.93218900 | -0.36731900 | 1.38675500  |
| C  | -2.52226900 | 0.65707200  | 0.65306000  |
| C  | -1.87335700 | 1.86476700  | 0.40071100  |
| H  | -0.02612700 | 2.95333700  | 0.70992800  |
| H  | 1.02783200  | 1.20488500  | 2.03711900  |
| H  | -0.15099500 | -0.96335800 | 2.43392600  |
| H  | -2.43818900 | -1.31400900 | 1.53557500  |
| H  | -2.34668800 | 2.63881500  | -0.19404200 |

|   |             |            |             |
|---|-------------|------------|-------------|
| I | -4.51698800 | 0.34170000 | -0.16335600 |
|---|-------------|------------|-------------|

**Complex TS<sub>b-c</sub>**

|    |             |             |             |
|----|-------------|-------------|-------------|
| Cu | 0.20334100  | -0.03783900 | -0.05362400 |
| C  | 1.95724700  | 0.31944600  | 2.03584200  |
| C  | 0.56044800  | 0.70821000  | 1.93697800  |
| C  | 0.09486600  | 2.08462100  | 1.80415700  |
| O  | 2.94485000  | 1.04098400  | 1.82370500  |
| O  | -1.05755800 | 2.42269100  | 2.13532100  |
| H  | -0.12756200 | 0.07224400  | 2.49253900  |
| C  | -1.94926800 | -0.60890600 | 0.10051300  |
| C  | -1.96618600 | -1.94587700 | -0.31873000 |
| C  | -2.44801300 | -2.91728800 | 0.56071600  |
| C  | -2.95142200 | -2.55553100 | 1.81214100  |
| C  | -2.96474800 | -1.20743900 | 2.19121200  |
| C  | -2.49033300 | -0.21700200 | 1.33322000  |
| I  | -1.90005800 | 0.97989100  | -1.55480200 |
| H  | -1.54542300 | -2.22075000 | -1.27683800 |
| H  | -2.42596500 | -3.96173100 | 0.25781400  |
| H  | -3.33507400 | -3.31686500 | 2.48727000  |
| H  | -3.34235800 | -0.91790600 | 3.16938900  |
| H  | -2.42946100 | 0.82058300  | 1.64958200  |
| C  | 1.03030600  | 3.12257900  | 1.20096800  |
| C  | 2.21569700  | -1.14155300 | 2.43853700  |
| H  | 0.48349700  | 4.06377400  | 1.08826600  |
| H  | 1.40639300  | 2.76806300  | 0.23572400  |
| H  | 1.91088300  | 3.25354000  | 1.83783100  |
| H  | 1.31623700  | -1.76286800 | 2.38491600  |
| H  | 2.61899300  | -1.17322800 | 3.45965100  |
| H  | 2.97347200  | -1.55000000 | 1.76282300  |
| O  | 1.77476100  | 0.84985400  | -1.13462400 |
| O  | 0.90557500  | -1.88136700 | -0.78527400 |
| C  | 2.90426700  | 0.29016000  | -1.21095600 |
| C  | 2.14121000  | -2.08417200 | -1.00515100 |
| C  | 2.55620500  | -3.55278700 | -1.02302900 |
| H  | 3.60269400  | -3.70529000 | -1.30769800 |
| H  | 2.39399200  | -3.97799700 | -0.02448800 |
| H  | 1.90931200  | -4.10283000 | -1.71659200 |
| C  | 4.10178100  | 1.22358000  | -1.27915000 |
| H  | 4.22531300  | 1.63697000  | -0.27134400 |
| H  | 5.02827600  | 0.72299000  | -1.58118300 |
| H  | 3.88688500  | 2.05143100  | -1.96346000 |
| C  | 3.13407900  | -1.10891400 | -1.19783900 |
| H  | 4.15823100  | -1.44910000 | -1.31418500 |

**Complex c**

|    |             |             |             |
|----|-------------|-------------|-------------|
| Cu | -0.01709500 | 0.12954700  | -0.11356500 |
| C  | 1.38159200  | 2.46369100  | 0.68121500  |
| C  | 0.12407300  | 2.23106200  | -0.07728300 |
| C  | -0.02249600 | 2.60799200  | -1.51415300 |
| O  | 2.49247600  | 2.61951700  | 0.17997700  |
| O  | -1.11699400 | 2.99200500  | -1.93019400 |
| H  | -0.74873200 | 2.56409200  | 0.47841500  |
| C  | -1.82996600 | 0.38609700  | 0.45635300  |
| C  | -2.11758400 | 0.08583300  | 1.78686700  |
| C  | -3.42776700 | 0.25047000  | 2.25469000  |
| C  | -4.43245600 | 0.71096900  | 1.40159800  |
| C  | -4.12349100 | 1.01168100  | 0.07184100  |
| C  | -2.81922700 | 0.85269700  | -0.40595200 |
| H  | -1.33585000 | -0.28791400 | 2.43825300  |
| H  | -3.65754900 | 0.00915600  | 3.29128500  |
| H  | -5.44907800 | 0.83555900  | 1.76899800  |
| H  | -4.89695000 | 1.37539300  | -0.60176600 |
| H  | -2.57565200 | 1.11320800  | -1.42929100 |
| C  | 1.16159700  | 2.50754600  | -2.45328800 |
| C  | 1.20402100  | 2.51903500  | 2.19488700  |
| H  | 1.99043500  | 3.11498400  | -2.07818100 |
| H  | 0.84850300  | 2.83171000  | -3.44949400 |
| H  | 1.52917000  | 1.47729700  | -2.46875700 |
| H  | 2.17923000  | 2.65323100  | 2.67001300  |
| H  | 0.74457300  | 1.58765900  | 2.54072800  |
| H  | 0.54115800  | 3.34915400  | 2.47156400  |
| O  | 1.76268300  | -0.05032400 | -0.86653600 |
| O  | 0.81835000  | -0.59631600 | 1.83703200  |
| C  | 2.82113500  | -0.53461000 | -0.34938300 |
| C  | 1.97370600  | -1.08837500 | 1.93701500  |
| C  | 2.29939500  | -1.75113600 | 3.27140200  |
| H  | 3.33872000  | -2.08602800 | 3.34910600  |
| H  | 2.08271400  | -1.04821200 | 4.08416500  |
| H  | 1.63591000  | -2.61411600 | 3.40345000  |
| C  | 4.02110200  | -0.48629400 | -1.27683800 |
| H  | 4.24353300  | 0.56655600  | -1.48616400 |
| H  | 4.90926100  | -0.96611600 | -0.85458100 |
| H  | 3.76222600  | -0.96634700 | -2.22711400 |
| C  | 2.97282100  | -1.07036700 | 0.93621700  |
| H  | 3.94322600  | -1.48445800 | 1.18727600  |
| I  | -0.74264100 | -2.25808500 | -1.07637500 |

**Complex TS<sub>c-p</sub>**

|    |             |            |             |
|----|-------------|------------|-------------|
| Cu | 0.06583800  | 0.16361000 | 0.03560000  |
| C  | 0.01117100  | 2.87734500 | 0.06099200  |
| C  | -1.13819200 | 1.94458400 | -0.30342400 |

|   |             |             |             |
|---|-------------|-------------|-------------|
| C | -1.48844800 | 1.88713000  | -1.78606700 |
| O | 0.60919900  | 3.51209100  | -0.79297800 |
| O | -2.61842500 | 2.20624600  | -2.12823500 |
| H | -2.01278500 | 2.35178900  | 0.20188300  |
| C | -1.78529100 | 0.26870400  | 0.62979700  |
| C | -1.87327200 | 0.32571300  | 2.02959300  |
| C | -2.94409500 | -0.28984000 | 2.68103800  |
| C | -3.95243000 | -0.92079900 | 1.94999000  |
| C | -3.87941300 | -0.93942500 | 0.55317100  |
| C | -2.81296300 | -0.33577800 | -0.10838600 |
| I | 0.17734600  | -2.34958500 | -1.04639100 |
| H | -1.08089000 | 0.78756100  | 2.60435500  |
| H | -2.98459000 | -0.27320300 | 3.76834500  |
| H | -4.78836000 | -1.39229200 | 2.46127500  |
| H | -4.65310600 | -1.43447200 | -0.02895100 |
| H | -2.76052200 | -0.36498900 | -1.18960300 |
| C | -0.46698800 | 1.38303800  | -2.77408900 |
| C | 0.29505200  | 3.07109600  | 1.53791000  |
| H | 0.53332000  | 1.73933700  | -2.52616400 |
| H | -0.76767000 | 1.67950100  | -3.78263100 |
| H | -0.43138500 | 0.28540600  | -2.71403300 |
| H | 0.93025300  | 3.95080000  | 1.66831200  |
| H | 0.80500100  | 2.17867800  | 1.91871900  |
| H | -0.63549600 | 3.18651300  | 2.10607800  |
| O | 1.82383900  | 0.78947400  | -0.71504300 |
| O | 1.10048800  | 0.00074900  | 1.96777600  |
| C | 2.97530400  | 0.48465000  | -0.27806000 |
| C | 2.34222500  | -0.24240400 | 2.02678400  |
| C | 2.83319500  | -0.83844300 | 3.34091000  |
| H | 3.92395500  | -0.90983100 | 3.40491200  |
| H | 2.45747900  | -0.23549300 | 4.17577100  |
| H | 2.40495100  | -1.84250600 | 3.44734600  |
| C | 4.10322700  | 0.68221200  | -1.27853500 |
| H | 4.03236600  | 1.68939300  | -1.70405500 |
| H | 5.09741400  | 0.53769700  | -0.84340300 |
| H | 3.96561000  | -0.03025900 | -2.10085500 |
| C | 3.28329200  | -0.01328800 | 1.00176900  |
| H | 4.32075900  | -0.25577600 | 1.20652700  |

### Complex p

|   |            |             |             |
|---|------------|-------------|-------------|
| C | 0.85240300 | -0.01952300 | -0.55755800 |
| H | 0.99976100 | 0.02356900  | -1.64035400 |
| C | 1.50931000 | -1.35690900 | -0.12766600 |
| C | 1.58218500 | 1.17926200  | 0.07482700  |
| O | 2.18126500 | -1.96309100 | -0.93811300 |
| O | 1.84378900 | 1.22604200  | 1.26269100  |

|   |             |             |             |
|---|-------------|-------------|-------------|
| C | 1.29237900  | -1.84048100 | 1.28570800  |
| H | 1.58307300  | -1.05304800 | 1.98870200  |
| H | 0.22930600  | -2.04637000 | 1.45287700  |
| H | 1.87754900  | -2.74667100 | 1.45235400  |
| C | 1.92988500  | 2.30435800  | -0.87460400 |
| H | 1.03239200  | 2.62649100  | -1.41709500 |
| H | 2.35845500  | 3.14313400  | -0.32283200 |
| H | 2.64717700  | 1.94615000  | -1.62407800 |
| C | -0.64560900 | 0.04241300  | -0.27045300 |
| C | -1.54262500 | -0.29507700 | -1.29334100 |
| C | -1.15566100 | 0.39797900  | 0.98619500  |
| C | -2.91913600 | -0.28239300 | -1.06742700 |
| H | -1.15794800 | -0.57509600 | -2.27117000 |
| C | -2.53287400 | 0.41198900  | 1.21048100  |
| H | -0.47328900 | 0.66922900  | 1.78494800  |
| C | -3.41923200 | 0.07178000  | 0.18687400  |
| H | -3.59934400 | -0.54802800 | -1.87221900 |
| H | -2.91266800 | 0.69267900  | 2.18925400  |
| H | -4.49104100 | 0.08396500  | 0.36477200  |

#### Complex d

|    |             |             |             |
|----|-------------|-------------|-------------|
| O  | -1.18407700 | -1.84747900 | 0.50482600  |
| O  | -1.50813200 | 0.12458000  | -1.57105800 |
| C  | -2.44300800 | -1.73557300 | 0.54682600  |
| C  | -2.72832800 | 0.01716900  | -1.21965200 |
| C  | -3.67856900 | 0.95818700  | -1.93304200 |
| H  | -3.48966700 | 0.92388200  | -3.01156100 |
| H  | -4.73301900 | 0.73879900  | -1.73594500 |
| H  | -3.43912900 | 1.96944700  | -1.58387300 |
| C  | -3.15191600 | -2.63718100 | 1.55205100  |
| H  | -2.79202400 | -2.39554100 | 2.55952400  |
| H  | -4.24225200 | -2.54093600 | 1.52912700  |
| H  | -2.87703800 | -3.67972900 | 1.35480000  |
| C  | -3.22795000 | -0.85253300 | -0.23226700 |
| H  | -4.29816400 | -0.84062800 | -0.05412100 |
| Cu | 0.01280500  | -0.28232500 | -0.36497100 |
| C  | -0.42238600 | 1.26642000  | 0.96836400  |
| H  | -1.42605800 | 0.90326900  | 1.20862800  |
| C  | -0.48481800 | 2.49687900  | 0.14471300  |
| C  | 0.53200900  | 1.10864400  | 2.08658500  |
| O  | -1.57042000 | 2.95761500  | -0.21434900 |
| O  | 1.49799100  | 1.83857000  | 2.30353400  |
| C  | 0.81591900  | 3.14294400  | -0.29099700 |
| H  | 1.41762200  | 3.39683500  | 0.58606200  |
| H  | 1.40470400  | 2.41638800  | -0.86503700 |
| H  | 0.59807300  | 4.02354300  | -0.90154200 |

|   |             |             |             |
|---|-------------|-------------|-------------|
| C | 0.22016300  | -0.04920000 | 3.03567000  |
| H | -0.03947000 | -0.95556300 | 2.47885000  |
| H | 1.08379200  | -0.23024900 | 3.68011500  |
| H | -0.64479600 | 0.21418900  | 3.66093300  |
| I | 2.50257500  | -0.80447400 | -0.65009300 |

**Complex e**

|    |             |             |             |
|----|-------------|-------------|-------------|
| O  | -0.56949400 | 1.98313400  | 1.25630100  |
| O  | -0.51770700 | 1.32173400  | -1.58468700 |
| C  | 0.37553600  | 2.74263200  | 0.88157000  |
| C  | 0.44779600  | 2.14147600  | -1.55744300 |
| C  | 1.23137900  | 2.27545900  | -2.85465700 |
| H  | 0.53383900  | 2.39610200  | -3.69036100 |
| H  | 1.94144800  | 3.10888600  | -2.84462600 |
| H  | 1.78262400  | 1.34128100  | -3.01871000 |
| C  | 1.05082600  | 3.53351300  | 1.99720100  |
| H  | 1.59670000  | 2.83658800  | 2.64640500  |
| H  | 1.75245400  | 4.28855900  | 1.62763200  |
| H  | 0.28465600  | 4.01659900  | 2.61294800  |
| C  | 0.88111000  | 2.87701300  | -0.42831500 |
| H  | 1.71589500  | 3.55570700  | -0.57093400 |
| Cu | -1.73176000 | 0.85383700  | 0.02299400  |
| C  | 1.42017000  | -0.99632500 | -0.13483900 |
| H  | 0.86548700  | -0.06455400 | 0.02695600  |
| C  | 1.20761600  | -1.33979500 | -1.62688300 |
| C  | 0.84655500  | -2.06516400 | 0.81133600  |
| O  | 2.09255000  | -1.15336300 | -2.44228700 |
| O  | 0.99728400  | -3.25317300 | 0.57697600  |
| C  | -0.15314300 | -1.86793300 | -2.01093100 |
| H  | -0.24854200 | -2.89889600 | -1.65192500 |
| H  | -0.95059500 | -1.28138600 | -1.54170400 |
| H  | -0.25912100 | -1.84049800 | -3.09744300 |
| C  | 0.13442600  | -1.55375100 | 2.03758800  |
| H  | -0.84454100 | -1.15432200 | 1.73388400  |
| H  | -0.01162100 | -2.36252100 | 2.75740900  |
| H  | 0.68417900  | -0.71900000 | 2.48693200  |
| I  | -3.68774000 | -0.71073800 | 0.25739200  |
| C  | 4.69575500  | 0.66745900  | 0.93102900  |
| C  | 3.35133200  | 0.47952200  | 0.60055700  |
| C  | 2.88274100  | -0.78143900 | 0.21679200  |
| C  | 3.78526900  | -1.85381200 | 0.16731100  |
| C  | 5.12666400  | -1.66677200 | 0.49680800  |
| C  | 5.58789800  | -0.40454000 | 0.88277300  |
| H  | 5.04311400  | 1.65570900  | 1.22411800  |
| H  | 2.66395300  | 1.31961000  | 0.60948200  |
| H  | 3.41957900  | -2.83429000 | -0.12121300 |



|   |            |             |            |
|---|------------|-------------|------------|
| H | 5.81444700 | -2.50819300 | 0.45232000 |
| H | 6.63467200 | -0.25943100 | 1.14043400 |

**Complex e'**

|    |             |             |             |
|----|-------------|-------------|-------------|
| O  | -0.57013100 | 0.48248500  | 1.61805900  |
| O  | -0.51797700 | 0.62449600  | -1.39154400 |
| C  | -1.28609900 | 1.44420100  | 1.40632600  |
| C  | -1.29653600 | 1.53060600  | -1.14146300 |
| C  | -1.54365100 | 2.67193400  | -2.09974500 |
| H  | -0.96178200 | 2.52161700  | -3.01126200 |
| H  | -2.61259900 | 2.73957400  | -2.34149600 |
| H  | -1.22780500 | 3.59825100  | -1.61005000 |
| C  | -1.45661600 | 2.56777300  | 2.40228500  |
| H  | -1.13152300 | 3.50071200  | 1.93410800  |
| H  | -2.51286500 | 2.65825400  | 2.69031200  |
| H  | -0.84643100 | 2.36703300  | 3.28566500  |
| C  | -2.15620100 | 1.52805400  | 0.13557600  |
| H  | -2.71692700 | 2.46727800  | 0.16678600  |
| Cu | 1.18381300  | -0.20925500 | -0.00039800 |
| C  | 2.16087100  | 1.54613200  | 0.57390600  |
| H  | 1.79579000  | 1.53406100  | 1.60198900  |
| C  | 1.50033400  | 2.53794200  | -0.24121500 |
| C  | 3.55101300  | 1.10487400  | 0.40890900  |
| O  | 0.46250100  | 3.12990000  | 0.15042500  |
| O  | 4.28882100  | 1.34849500  | -0.55301400 |
| C  | 1.99788900  | 2.82866500  | -1.64878400 |
| H  | 3.08822100  | 2.83568900  | -1.69463000 |
| H  | 1.65460700  | 2.01932600  | -2.30551700 |
| H  | 1.56421100  | 3.77320100  | -1.99207800 |
| C  | 4.09805900  | 0.23092500  | 1.54536500  |
| H  | 3.78110900  | -0.80478800 | 1.37150600  |
| H  | 5.19115900  | 0.27356200  | 1.53650700  |
| H  | 3.71475200  | 0.53093700  | 2.52764900  |
| I  | 1.17341800  | -2.75689400 | -0.19629200 |
| C  | -3.60055400 | -2.00988100 | -0.01534700 |
| C  | -2.68350000 | -0.96026500 | 0.03000100  |
| C  | -3.14030100 | 0.36567700  | 0.08798500  |
| C  | -4.51834300 | 0.61577700  | 0.09807100  |
| C  | -5.43375800 | -0.43830100 | 0.05277100  |
| C  | -4.97530200 | -1.75585200 | -0.00419200 |
| H  | -3.22836200 | -3.03001100 | -0.06106700 |
| H  | -1.61952700 | -1.16862300 | 0.01948900  |
| H  | -4.87742300 | 1.64261000  | 0.14199000  |
| H  | -6.50104700 | -0.22803000 | 0.06159500  |
| H  | -5.68477400 | -2.57945100 | -0.04056700 |

**Complex f**

|    |             |             |             |
|----|-------------|-------------|-------------|
| O  | 1.82173500  | -1.38087500 | -0.24057900 |
| O  | 0.50376800  | 1.09641900  | 0.25051000  |
| C  | 2.87160400  | -0.66041900 | -0.06951700 |
| C  | 1.71456900  | 1.50260000  | 0.35763100  |
| C  | 1.84051700  | 2.97760600  | 0.66370800  |
| H  | 1.29115600  | 3.19885800  | 1.58514100  |
| H  | 2.87939100  | 3.29777400  | 0.77061800  |
| H  | 1.36414100  | 3.54979400  | -0.14018800 |
| C  | 4.17724100  | -1.40639000 | -0.19984900 |
| H  | 4.23404500  | -1.85738000 | -1.19698600 |
| H  | 5.04681000  | -0.76417100 | -0.04329700 |
| H  | 4.19654100  | -2.22696800 | 0.52617700  |
| C  | 2.86899000  | 0.71300600  | 0.21650600  |
| H  | 3.82737500  | 1.20271700  | 0.33624300  |
| Cu | 0.05181100  | -0.73397000 | -0.15234700 |
| C  | -1.92494500 | -0.69600500 | -0.21354600 |
| H  | -2.10434800 | -1.75360900 | -0.45633200 |
| C  | -2.15010300 | 0.14817200  | -1.42921200 |
| C  | -2.39928900 | -0.31536900 | 1.14307700  |
| O  | -2.03554100 | -0.36270500 | -2.54165700 |
| O  | -2.62740600 | 0.83534500  | 1.49526000  |
| C  | -2.44179300 | 1.62512800  | -1.27272200 |
| H  | -3.36154100 | 1.77962800  | -0.70084600 |
| H  | -1.64355200 | 2.09598800  | -0.69093600 |
| H  | -2.51983500 | 2.07370400  | -2.26579500 |
| C  | -2.57774800 | -1.47428800 | 2.12232900  |
| H  | -1.69812800 | -2.13055600 | 2.13015200  |
| H  | -2.75433700 | -1.08074100 | 3.12550400  |
| H  | -3.43493600 | -2.08963000 | 1.81991900  |

**Complex g**

|   |             |             |             |
|---|-------------|-------------|-------------|
| O | -0.27259100 | 0.38130500  | -1.87214300 |
| O | 0.41436600  | -2.00269000 | -0.54247000 |
| C | -1.24402200 | -0.33748700 | -2.28821100 |
| C | -0.62157900 | -2.44359000 | -1.16078400 |
| C | -0.95894900 | -3.88392400 | -0.85074500 |
| H | -1.31988200 | -3.93321000 | 0.18373100  |
| H | -1.72912100 | -4.28806900 | -1.51339600 |
| H | -0.05380200 | -4.49748400 | -0.91165400 |
| C | -2.27986700 | 0.40973400  | -3.09049900 |
| H | -1.80267900 | 1.19453800  | -3.68437200 |
| H | -2.86985800 | -0.25107800 | -3.73259800 |
| H | -2.95005100 | 0.88164000  | -2.35928900 |
| C | -1.42991600 | -1.70510500 | -2.02278400 |
| H | -2.31068600 | -2.18375800 | -2.43247900 |

|    |             |             |             |
|----|-------------|-------------|-------------|
| Cu | 0.92997000  | -0.14440000 | -0.45570900 |
| C  | 2.28993900  | -0.52551400 | 0.96837000  |
| H  | 2.59143100  | 0.41573200  | 1.42626200  |
| C  | 3.45583200  | -1.08900500 | 0.19827900  |
| C  | 1.54050600  | -1.36988200 | 1.97539400  |
| O  | 4.38623900  | -0.34918400 | -0.11562600 |
| O  | 1.85470400  | -2.52315400 | 2.23411100  |
| C  | 3.46727800  | -2.54920000 | -0.19886600 |
| H  | 3.57809200  | -3.16023800 | 0.70179700  |
| H  | 2.50697900  | -2.82981300 | -0.63918400 |
| H  | 4.29484100  | -2.72128300 | -0.89210200 |
| C  | 0.38816100  | -0.68333800 | 2.67370000  |
| H  | -0.50479400 | -0.70680600 | 2.02995100  |
| H  | 0.15242300  | -1.20476300 | 3.60477000  |
| H  | 0.59729200  | 0.37474400  | 2.86432800  |
| C  | 1.62776500  | 4.45315000  | -0.06708000 |
| C  | 2.70171700  | 3.66718000  | -0.49103600 |
| C  | 2.58017700  | 2.27227300  | -0.54141600 |
| C  | 1.36388300  | 1.69704800  | -0.18907400 |
| C  | 0.27963600  | 2.45701700  | 0.24535500  |
| C  | 0.42407800  | 3.84830800  | 0.30452800  |
| H  | 1.73068500  | 5.53519400  | -0.01993200 |
| H  | 3.64508100  | 4.13152100  | -0.77138700 |
| H  | 3.42693900  | 1.64984500  | -0.81176000 |
| H  | -0.67015600 | 1.99289500  | 0.50683000  |
| H  | -0.41814300 | 4.45152300  | 0.63576600  |
| I  | -3.15911800 | 0.37698600  | 0.91714200  |

### Complex TS<sub>g-p</sub>

|    |             |             |             |
|----|-------------|-------------|-------------|
| Cu | 1.35736300  | 0.12422400  | 0.56127700  |
| C  | 1.34607400  | 0.32020000  | -2.04023400 |
| C  | 1.85988200  | -0.88886100 | -1.24157700 |
| C  | 3.36657600  | -1.07436300 | -1.13465600 |
| O  | 2.12912100  | 1.07395700  | -2.59739700 |
| O  | 3.81364400  | -2.21413300 | -1.13244400 |
| H  | 1.45949100  | -1.77722900 | -1.72976300 |
| C  | 0.92604500  | -1.72747700 | 0.33089800  |
| C  | -0.45762900 | -1.93973400 | 0.24554800  |
| C  | -1.02155700 | -3.00150000 | 0.94905200  |
| C  | -0.21667300 | -3.85947600 | 1.70644300  |
| C  | 1.16231900  | -3.65129000 | 1.76570600  |
| C  | 1.74762700  | -2.59350900 | 1.06218100  |
| I  | -3.79313400 | -0.03484900 | -0.77235200 |
| H  | -1.11834800 | -1.26907700 | -0.29482700 |
| H  | -2.09959300 | -3.13075800 | 0.90524000  |
| H  | -0.66440700 | -4.68964200 | 2.24738400  |

|   |             |             |             |
|---|-------------|-------------|-------------|
| H | 1.79464600  | -4.31615100 | 2.34953900  |
| H | 2.82243000  | -2.45933200 | 1.07576300  |
| C | 4.29425000  | 0.11840400  | -1.01899500 |
| C | -0.14918500 | 0.47775300  | -2.18678700 |
| H | 4.49882400  | 0.48866200  | -2.02886100 |
| H | 5.22732900  | -0.21881000 | -0.55823000 |
| H | 3.85071800  | 0.95091100  | -0.46854100 |
| H | -0.35877900 | 1.21671800  | -2.96263600 |
| H | -0.61655700 | 0.81855600  | -1.25376700 |
| H | -0.64295700 | -0.46801800 | -2.43028400 |
| O | 2.13434900  | 1.90633800  | 0.55239800  |
| O | -0.13650100 | 0.66800600  | 1.78600700  |
| C | 1.43601100  | 2.95962100  | 0.79348100  |
| C | -0.56068100 | 1.86442700  | 1.82658900  |
| C | -1.95290400 | 2.04446300  | 2.38250700  |
| H | -2.20266700 | 3.09122000  | 2.58097200  |
| H | -2.66020400 | 1.63398100  | 1.64645800  |
| H | -2.06009300 | 1.45277100  | 3.29756700  |
| C | 2.11154600  | 4.25340900  | 0.38304700  |
| H | 2.31011300  | 4.21951100  | -0.69467500 |
| H | 1.51332400  | 5.13958900  | 0.61345800  |
| H | 3.08216000  | 4.33100700  | 0.88746200  |
| C | 0.16252400  | 2.99656900  | 1.36653600  |
| H | -0.31308400 | 3.96544000  | 1.46844500  |

### Complex h

|    |             |             |             |
|----|-------------|-------------|-------------|
| Cu | -0.97576800 | 0.83951200  | -0.92512500 |
| C  | -2.68121000 | -1.48362600 | 1.52601600  |
| C  | -1.80766400 | -2.40920300 | 0.64700400  |
| C  | -2.64014600 | -3.18000200 | -0.40090000 |
| O  | -3.87930600 | -1.68911100 | 1.61682800  |
| O  | -2.40450400 | -4.35716700 | -0.59570900 |
| H  | -1.45413300 | -3.18228700 | 1.34460300  |
| C  | -0.56761800 | -1.75293900 | 0.05135800  |
| C  | 0.60544600  | -1.68797100 | 0.79831100  |
| C  | 1.75445400  | -1.02833200 | 0.32641600  |
| C  | 1.74533900  | -0.41304300 | -0.91542600 |
| C  | 0.58173600  | -0.47948800 | -1.71760500 |
| C  | -0.57476000 | -1.16360100 | -1.24955900 |
| I  | 5.49250600  | 0.02865200  | 0.22959200  |
| H  | 0.63522200  | -2.16346800 | 1.77650100  |
| H  | 2.67070100  | -0.99743300 | 0.91040700  |
| H  | 2.64893700  | 0.07985100  | -1.26356300 |
| H  | 0.62863200  | -0.15623100 | -2.75604100 |
| H  | -1.37731000 | -1.39790200 | -1.94494100 |
| C  | -3.71997200 | -2.44915300 | -1.17750100 |

|   |             |             |             |
|---|-------------|-------------|-------------|
| C | -1.99261600 | -0.41928500 | 2.35167800  |
| H | -4.67438800 | -2.64681100 | -0.67709800 |
| H | -3.76566600 | -2.85919700 | -2.19096400 |
| H | -3.58312000 | -1.36528000 | -1.18349600 |
| H | -2.72821900 | 0.05772900  | 3.00245700  |
| H | -1.53178800 | 0.33213800  | 1.70431900  |
| H | -1.18745000 | -0.85731500 | 2.95259400  |
| O | -2.95534800 | 0.72934200  | -0.49208100 |
| O | -0.82879800 | 2.73652000  | -0.49635100 |
| C | -3.59196700 | 1.68722500  | 0.05965100  |
| C | -1.76668000 | 3.41478100  | 0.03740700  |
| C | -1.39203800 | 4.84724600  | 0.37570500  |
| H | -2.20920400 | 5.40851500  | 0.83805000  |
| H | -0.52905500 | 4.84033000  | 1.05106400  |
| H | -1.07535000 | 5.35967100  | -0.54004900 |
| C | -5.02235700 | 1.36372700  | 0.44978000  |
| H | -5.01573500 | 0.48716700  | 1.10766800  |
| H | -5.53154000 | 2.19529100  | 0.94585600  |
| H | -5.58515300 | 1.08364200  | -0.44886200 |
| C | -3.07270500 | 2.96719700  | 0.33203500  |
| H | -3.74072100 | 3.67931900  | 0.80400400  |

### Complex h'

|    |             |             |             |
|----|-------------|-------------|-------------|
| O  | -0.60659600 | -0.81382400 | -1.89261500 |
| O  | -0.39837600 | -2.12502100 | 0.67406200  |
| C  | 0.53096000  | -0.53605900 | -1.48377500 |
| C  | 0.15085800  | -1.07966200 | 0.99412200  |
| C  | 0.22028300  | -0.64026600 | 2.43808700  |
| H  | 0.30149200  | -1.52675000 | 3.07245200  |
| H  | 1.05114500  | 0.04516900  | 2.62390700  |
| H  | -0.72388500 | -0.13163200 | 2.67501400  |
| C  | 1.66634100  | -0.47241200 | -2.45307600 |
| H  | 1.32976600  | -0.73079100 | -3.45915800 |
| H  | 2.09425600  | 0.53721500  | -2.43855600 |
| H  | 2.48304900  | -1.12401400 | -2.11324800 |
| C  | 0.83725400  | -0.18325800 | -0.03499300 |
| H  | 1.92054600  | -0.35949800 | 0.12536900  |
| Cu | -2.28845900 | -0.95688200 | -0.95598000 |
| C  | -4.01143300 | -0.87741200 | -0.00424400 |
| H  | -4.51945000 | -1.82022600 | -0.22732900 |
| C  | -4.73953700 | 0.24606600  | -0.65885700 |
| C  | -3.50438800 | -0.80367500 | 1.37967600  |
| O  | -5.59975900 | 0.02281800  | -1.50912200 |
| O  | -3.14024000 | 0.23279300  | 1.95627800  |
| C  | -4.39581600 | 1.68558500  | -0.29467000 |

|   |             |             |             |
|---|-------------|-------------|-------------|
| H | -4.38676700 | 1.82842800  | 0.78894400  |
| H | -3.38348100 | 1.92137000  | -0.64408400 |
| H | -5.11242100 | 2.35084500  | -0.78352400 |
| C | -3.36404700 | -2.13163500 | 2.12340800  |
| H | -2.37200200 | -2.54410300 | 1.90535300  |
| H | -3.43067000 | -1.94280500 | 3.19870400  |
| H | -4.11571200 | -2.86839700 | 1.82215500  |
| C | -0.88880400 | 3.19056800  | 0.55134300  |
| C | -0.68232400 | 1.81520500  | 0.43680400  |
| C | 0.59482500  | 1.31638600  | 0.14350100  |
| C | 1.66315300  | 2.20830700  | -0.02570200 |
| C | 1.44941300  | 3.58346500  | 0.08571000  |
| C | 0.17390900  | 4.07855000  | 0.36817600  |
| H | -1.88281700 | 3.55839300  | 0.79125900  |
| H | -1.51594300 | 1.14375000  | 0.62250800  |
| H | 2.66078000  | 1.81694700  | -0.21528400 |
| H | 2.28628400  | 4.26564500  | -0.04088300 |
| H | 0.01082600  | 5.15015600  | 0.45607300  |
| I | 4.66841900  | -0.54250500 | 0.08192200  |

#### Complex a...p

|    |             |             |             |
|----|-------------|-------------|-------------|
| Cu | -1.60374300 | -0.82893200 | -0.25128100 |
| C  | 3.26312400  | 0.12889700  | -1.12652800 |
| C  | 2.83295000  | 1.48213200  | -0.54050200 |
| C  | 1.93079000  | 2.25025200  | -1.54483000 |
| O  | 3.20254600  | -0.06807100 | -2.32795600 |
| O  | 2.33941400  | 3.29231200  | -2.02262100 |
| H  | 3.76285100  | 2.06757500  | -0.50111200 |
| C  | 2.23845800  | 1.43080800  | 0.85453100  |
| C  | 1.21788400  | 0.52624400  | 1.17574100  |
| C  | 0.63658400  | 0.52285100  | 2.44381600  |
| C  | 1.08250600  | 1.42149600  | 3.41596600  |
| C  | 2.10498000  | 2.32345600  | 3.11133900  |
| C  | 2.67631300  | 2.32908500  | 1.83766500  |
| I  | -3.33531000 | 0.98992200  | -0.24503100 |
| H  | 0.85902600  | -0.17519000 | 0.43012700  |
| H  | -0.16504000 | -0.18118900 | 2.64198700  |
| H  | 0.62864900  | 1.42450600  | 4.40400800  |
| H  | 2.45443600  | 3.02892800  | 3.86193700  |
| H  | 3.46230600  | 3.04247300  | 1.59834600  |
| C  | 0.56801100  | 1.68035700  | -1.84829500 |
| C  | 3.81161200  | -0.91890600 | -0.17921600 |
| H  | 0.60760000  | 0.60691500  | -2.05764600 |
| H  | 0.13378300  | 2.21485500  | -2.69565500 |
| H  | -0.10057500 | 1.79830800  | -0.98573900 |
| H  | 4.49172100  | -1.57517000 | -0.72845200 |

|   |             |             |             |
|---|-------------|-------------|-------------|
| H | 2.97609100  | -1.52421600 | 0.19712600  |
| H | 4.31029500  | -0.47066500 | 0.68597600  |
| O | -0.17614200 | -1.63705000 | -1.46814400 |
| O | -0.89542700 | -2.01749200 | 1.32697500  |
| C | 0.64791700  | -2.55694100 | -1.17458200 |
| C | 0.07790000  | -2.82192300 | 1.25860100  |
| C | 0.47742700  | -3.47882400 | 2.57631200  |
| H | 1.22581600  | -4.26967600 | 2.45944000  |
| H | 0.88403800  | -2.70590300 | 3.24126000  |
| H | -0.41445400 | -3.88824600 | 3.06292000  |
| C | 1.53275800  | -3.03147900 | -2.31918800 |
| H | 2.19517000  | -2.21381200 | -2.62443800 |
| H | 2.14021900  | -3.90406700 | -2.05597000 |
| H | 0.89914900  | -3.27801300 | -3.17845400 |
| C | 0.82836000  | -3.13569600 | 0.10145500  |
| H | 1.60032900  | -3.89269200 | 0.19839000  |

### Complex PhI

|   |             |             |             |
|---|-------------|-------------|-------------|
| C | -2.66651500 | 1.20749400  | -0.00000100 |
| C | -3.36684500 | 0.00000500  | 0.00000300  |
| C | -2.66655000 | -1.20747700 | -0.00000100 |
| C | -1.26884500 | -1.21676500 | -0.00000100 |
| C | -0.58793100 | -0.00001900 | -0.00000200 |
| C | -1.26883600 | 1.21676200  | -0.00000200 |
| H | -3.20369900 | 2.15213600  | 0.00000400  |
| H | -4.45306500 | 0.00003300  | 0.00000200  |
| H | -3.20371500 | -2.15213000 | 0.00000400  |
| H | -0.72680400 | -2.15608900 | -0.00000600 |
| H | -0.72675000 | 2.15606000  | -0.00000500 |
| I | 1.57107900  | 0.00000000  | 0.00000000  |

### Complex PhI-radical

|   |             |             |             |
|---|-------------|-------------|-------------|
| C | 3.91413400  | -0.00012200 | 0.00028400  |
| C | 3.21409900  | 1.21165200  | 0.00010600  |
| C | 1.81054600  | 1.21355600  | -0.00027300 |
| C | 1.14041900  | 0.00012400  | -0.00045300 |
| C | 1.81033000  | -1.21342700 | -0.00026400 |
| C | 3.21388300  | -1.21177200 | 0.00009800  |
| H | 5.00290500  | -0.00021900 | 0.00057500  |
| H | 3.76241400  | 2.15423200  | 0.00025800  |
| H | 1.25810400  | 2.15135400  | -0.00040600 |
| H | 1.25771500  | -2.15112100 | -0.00039900 |
| H | 3.76202900  | -2.15444900 | 0.00024900  |
| I | -1.99365300 | 0.00000300  | 0.00005200  |

### Complex Ph-radical

|   |             |             |             |
|---|-------------|-------------|-------------|
| C | -1.21437700 | 0.63277300  | -0.00000600 |
| C | -1.22652500 | -0.77200200 | 0.00002200  |
| C | -0.00001200 | -1.40049900 | -0.00001000 |
| C | 1.22652700  | -0.77199300 | -0.00000800 |
| C | 1.21439000  | 0.63274600  | 0.00001800  |
| C | -0.00000300 | 1.32510100  | -0.00000500 |
| H | -2.15492700 | 1.17909500  | -0.00002700 |
| H | -2.16321900 | -1.32327800 | -0.00000900 |
| H | 2.16319100  | -1.32332300 | -0.00002600 |
| H | 2.15492100  | 1.17910400  | 0.00001100  |
| H | 0.00002600  | 2.41165600  | -0.00002200 |



## 12. TPSS-optimised geometries (singlet spin state)

### Complex b

|    |             |             |             |
|----|-------------|-------------|-------------|
| O  | 1.39164000  | -1.40174100 | -0.19066100 |
| O  | 1.08985400  | 1.50484600  | -0.05368500 |
| C  | 2.61755400  | -1.07367200 | -0.02082400 |
| C  | 2.35535300  | 1.42503500  | 0.10312900  |
| C  | 3.07608500  | 2.76256400  | 0.29095400  |
| H  | 2.67963500  | 3.26838000  | 1.18317000  |
| H  | 4.16367300  | 2.65067900  | 0.39831400  |
| H  | 2.86500500  | 3.41461500  | -0.56850000 |
| C  | 3.59988600  | -2.24608900 | 0.03195200  |
| H  | 3.52912100  | -2.82558400 | -0.89991200 |
| H  | 4.64045200  | -1.92434400 | 0.17414200  |
| H  | 3.31900800  | -2.92132600 | 0.85300000  |
| C  | 3.12684400  | 0.23747500  | 0.11992700  |
| H  | 4.20255100  | 0.34241200  | 0.26262200  |
| Cu | -0.14388500 | -0.10224100 | -0.28641300 |
| C  | -2.11752100 | -0.16120000 | -0.58309100 |
| H  | -2.21561700 | -0.42380100 | -1.64367500 |
| C  | -2.63077500 | 1.19390800  | -0.30806200 |
| C  | -2.19423200 | -1.30818600 | 0.33369500  |
| O  | -2.99722700 | 1.95198000  | -1.22785100 |
| O  | -2.41648500 | -1.27987300 | 1.57047700  |
| C  | -2.68744600 | 1.68586600  | 1.14236400  |
| H  | -2.91404200 | 0.85671700  | 1.82441000  |
| H  | -1.69912600 | 2.08191000  | 1.42273100  |
| H  | -3.42148900 | 2.49977300  | 1.21414900  |
| C  | -2.05203800 | -2.69842300 | -0.32563300 |
| H  | -1.73811600 | -2.64717100 | -1.37688000 |
| H  | -1.32094200 | -3.29364100 | 0.23625200  |
| H  | -3.02195800 | -3.21900700 | -0.26655700 |

### Complex PhI...b

|   |            |            |             |
|---|------------|------------|-------------|
| O | 4.96557600 | 0.90092300 | -0.37691000 |
| O | 2.09820300 | 1.30259800 | 0.10731100  |
| C | 4.96095800 | 2.16710900 | -0.18832700 |
| C | 2.50134900 | 2.51261400 | 0.22801700  |
| C | 1.41122500 | 3.54105800 | 0.53490400  |
| H | 0.86480500 | 3.23657600 | 1.43883300  |
| H | 1.81136400 | 4.55299000 | 0.68190900  |
| H | 0.68623800 | 3.56371200 | -0.29191000 |
| C | 6.32904300 | 2.84248100 | -0.29245500 |
| H | 6.75387800 | 2.65716200 | -1.28949400 |
| H | 6.28276800 | 3.92590500 | -0.11985200 |
| H | 7.01492600 | 2.39187800 | 0.43895900  |

|    |             |             |             |
|----|-------------|-------------|-------------|
| C  | 3.83314400  | 2.97054000  | 0.09938000  |
| H  | 4.00563900  | 4.03800600  | 0.23512800  |
| Cu | 3.34762000  | -0.27557500 | -0.26767100 |
| C  | 2.93406800  | -2.21640900 | -0.50231600 |
| H  | 3.00931300  | -2.36724500 | -1.58579000 |
| C  | 1.55040900  | -2.31715200 | -0.02572700 |
| C  | 4.14157800  | -2.58785900 | 0.25242900  |
| O  | 0.59335900  | -2.41301700 | -0.83156500 |
| O  | 4.23308300  | -2.78530500 | 1.48775800  |
| C  | 1.26190000  | -2.28165400 | 1.47743000  |
| H  | 2.13628400  | -2.61346200 | 2.04969000  |
| H  | 1.02797600  | -1.24759500 | 1.77344000  |
| H  | 0.37755000  | -2.89998000 | 1.68409900  |
| C  | 5.40808300  | -2.81846000 | -0.59954300 |
| H  | 5.30955200  | -2.44696500 | -1.62806100 |
| H  | 6.26309400  | -2.32685300 | -0.11883600 |
| H  | 5.62005600  | -3.89954200 | -0.63163900 |
| C  | -1.93641100 | -0.60808900 | -0.23644100 |
| C  | -1.43589200 | 0.67545600  | 0.03168500  |
| C  | -2.32060800 | 1.73556600  | 0.27089600  |
| C  | -3.71072300 | 1.53299300  | 0.24417800  |
| C  | -4.17911300 | 0.24540700  | -0.02659600 |
| C  | -3.32354400 | -0.83239700 | -0.26703400 |
| H  | -1.23571800 | -1.42984800 | -0.42042100 |
| H  | -0.35822200 | 0.84059100  | 0.05102900  |
| H  | -1.93684100 | 2.73451200  | 0.48097600  |
| H  | -4.39865600 | 2.35464900  | 0.42858300  |
| H  | -3.71732400 | -1.82450900 | -0.47457000 |
| I  | -6.34475900 | -0.08787000 | -0.07613700 |

### Complex TS<sub>b-c</sub>

|    |             |             |             |
|----|-------------|-------------|-------------|
| Cu | -0.39517400 | -0.24676700 | 0.24040900  |
| C  | -1.10301000 | -2.61636300 | 1.28538300  |
| C  | 0.00895300  | -2.27426300 | 0.39115100  |
| C  | 0.10189700  | -2.70206100 | -1.01283200 |
| O  | -2.22185900 | -3.05965600 | 0.95097400  |
| O  | 1.20838800  | -2.79049000 | -1.59844200 |
| H  | 0.98306800  | -2.24593000 | 0.88664400  |
| C  | 1.99634100  | 0.47577300  | 0.15199800  |
| C  | 2.14322900  | 1.40341100  | 1.19731800  |
| C  | 3.07607600  | 1.13396100  | 2.20831900  |
| C  | 3.88058300  | -0.01379400 | 2.15219400  |
| C  | 3.73865100  | -0.90635800 | 1.07646900  |
| C  | 2.81458700  | -0.66312000 | 0.05126300  |
| I  | 1.07317500  | 1.25336300  | -1.76915900 |
| H  | 1.50525600  | 2.27989600  | 1.24683600  |

|   |             |             |             |
|---|-------------|-------------|-------------|
| H | 3.17144800  | 1.83266900  | 3.04074600  |
| H | 4.61466800  | -0.20845300 | 2.93453500  |
| H | 4.34929000  | -1.80909400 | 1.02878800  |
| H | 2.65246300  | -1.38988400 | -0.74682300 |
| C | -1.17477400 | -3.03353900 | -1.78101600 |
| C | -0.83904500 | -2.40392300 | 2.79329800  |
| H | -0.89978600 | -3.36026700 | -2.79210100 |
| H | -1.82496300 | -2.14943600 | -1.82623200 |
| H | -1.74881000 | -3.80533700 | -1.25172100 |
| H | 0.18167000  | -2.06335400 | 3.01192500  |
| H | -1.03265600 | -3.34727200 | 3.32614500  |
| H | -1.54661900 | -1.65690300 | 3.17866800  |
| O | -2.22851300 | -0.02150400 | -0.74867000 |
| O | -0.82581000 | 1.29829200  | 1.48126100  |
| C | -3.11892100 | 0.82649300  | -0.42357700 |
| C | -1.93441700 | 1.94435600  | 1.49916500  |
| C | -2.02960800 | 3.01925900  | 2.58421300  |
| H | -2.98654500 | 3.55739200  | 2.56577600  |
| H | -1.90094200 | 2.55366900  | 3.57203900  |
| H | -1.21087200 | 3.74284900  | 2.45943300  |
| C | -4.38931100 | 0.81067600  | -1.27768500 |
| H | -4.83763500 | -0.19162700 | -1.23614000 |
| H | -5.13220100 | 1.55176200  | -0.95303900 |
| H | -4.12472600 | 1.00479300  | -2.32695700 |
| C | -3.03642600 | 1.76653800  | 0.63780400  |
| H | -3.89680100 | 2.41711900  | 0.79324000  |

### Complex c

|    |             |             |             |
|----|-------------|-------------|-------------|
| Cu | 0.02087100  | 0.16885000  | -0.06370200 |
| C  | 1.19109300  | 2.61754300  | 0.78997600  |
| C  | 0.05265900  | 2.29321900  | -0.11056700 |
| C  | 0.05359000  | 2.61676400  | -1.56974100 |
| O  | 2.35383800  | 2.83969300  | 0.41813200  |
| O  | -1.02199500 | 2.88333600  | -2.13640000 |
| H  | -0.91120300 | 2.55389100  | 0.32781200  |
| C  | -1.84661100 | 0.31155600  | 0.43661100  |
| C  | -2.18820400 | -0.12457700 | 1.72348100  |
| C  | -3.52651200 | -0.03454700 | 2.14821700  |
| C  | -4.51136500 | 0.48191100  | 1.29636100  |
| C  | -4.15257000 | 0.91754400  | 0.01222300  |
| C  | -2.81956100 | 0.83717400  | -0.42363900 |
| H  | -1.42608100 | -0.54222700 | 2.37763000  |
| H  | -3.79165200 | -0.38102500 | 3.14920100  |
| H  | -5.54853000 | 0.54602600  | 1.62905900  |
| H  | -4.90795100 | 1.32845900  | -0.65987100 |
| H  | -2.54459800 | 1.21181300  | -1.40754500 |

|   |             |             |             |
|---|-------------|-------------|-------------|
| C | 1.35454500  | 2.63937600  | -2.35524600 |
| C | 0.84012700  | 2.68141200  | 2.28047700  |
| H | 2.08884900  | 3.28515400  | -1.85736400 |
| H | 1.14137800  | 2.98046300  | -3.37530000 |
| H | 1.79168200  | 1.63239600  | -2.36396200 |
| H | 1.71381200  | 3.03189800  | 2.84217800  |
| H | 0.55573000  | 1.67745400  | 2.62601600  |
| H | -0.01261700 | 3.35274100  | 2.45961900  |
| O | 1.84332600  | 0.04297500  | -0.75056400 |
| O | 0.74074100  | -0.56609600 | 1.88050300  |
| C | 2.83876000  | -0.58031500 | -0.22991200 |
| C | 1.86898200  | -1.14002100 | 2.01277700  |
| C | 2.10786700  | -1.84055800 | 3.35131300  |
| H | 3.12553700  | -2.24067400 | 3.44723300  |
| H | 1.91683500  | -1.13595200 | 4.17262400  |
| H | 1.38952200  | -2.66624000 | 3.45539800  |
| C | 4.06276300  | -0.64451000 | -1.13478400 |
| H | 4.37745800  | 0.37744300  | -1.38652100 |
| H | 4.90067800  | -1.17547300 | -0.66607800 |
| H | 3.79255900  | -1.14954500 | -2.07244200 |
| C | 2.89862700  | -1.17847100 | 1.04117800  |
| H | 3.82314700  | -1.68882600 | 1.30556500  |
| I | -0.61796700 | -2.20027700 | -1.18984200 |

**Complex TS<sub>c-p</sub>**

|    |             |             |             |
|----|-------------|-------------|-------------|
| Cu | 0.11558400  | 0.17128600  | 0.02840700  |
| C  | 0.04922800  | 2.78618600  | -0.40478300 |
| C  | -1.16245300 | 1.86934400  | -0.58851500 |
| C  | -1.55832800 | 1.57770200  | -2.03481100 |
| O  | 0.72105000  | 3.18126200  | -1.36086300 |
| O  | -2.69620100 | 1.88886500  | -2.39819300 |
| H  | -2.00853800 | 2.39759400  | -0.13893100 |
| C  | -1.75090500 | 0.40938300  | 0.60031800  |
| C  | -1.84615600 | 0.73478500  | 1.97316600  |
| C  | -2.90690900 | 0.23829200  | 2.74171200  |
| C  | -3.91379200 | -0.53838100 | 2.15192400  |
| C  | -3.84403600 | -0.82355400 | 0.77892000  |
| C  | -2.78643700 | -0.34215500 | 0.00194000  |
| I  | 0.11101200  | -2.49171300 | -0.72243500 |
| H  | -1.06413900 | 1.31895300  | 2.44986600  |
| H  | -2.94229000 | 0.46561300  | 3.80845500  |
| H  | -4.74387800 | -0.91358500 | 2.75099300  |
| H  | -4.61435800 | -1.43313100 | 0.30562700  |
| H  | -2.74501400 | -0.58451000 | -1.05644900 |
| C  | -0.57667500 | 0.89272300  | -2.95774500 |
| C  | 0.30636600  | 3.31679000  | 1.00248200  |

|   |             |             |             |
|---|-------------|-------------|-------------|
| H | 0.41373000  | 1.35256200  | -2.86965600 |
| H | -0.95457100 | 0.94192000  | -3.98590800 |
| H | -0.46500800 | -0.16341100 | -2.65497400 |
| H | 0.99306400  | 4.16856200  | 0.93812400  |
| H | 0.76006200  | 2.52120300  | 1.61246100  |
| H | -0.63011700 | 3.62398500  | 1.49013400  |
| O | 1.86990400  | 0.53316300  | -0.87230100 |
| O | 1.09748400  | 0.31056300  | 1.92105500  |
| C | 3.02528500  | 0.34968600  | -0.35693400 |
| C | 2.35571800  | 0.11056300  | 2.04907400  |
| C | 2.83582600  | -0.14858400 | 3.47730700  |
| H | 3.92764500  | -0.23937800 | 3.54968000  |
| H | 2.49698000  | 0.66554700  | 4.13401500  |
| H | 2.37533400  | -1.07607100 | 3.84601800  |
| C | 4.18122500  | 0.38135200  | -1.35245900 |
| H | 4.12435900  | 1.30378600  | -1.94614400 |
| H | 5.16235300  | 0.32240600  | -0.86334800 |
| H | 4.07629800  | -0.46335000 | -2.04788600 |
| C | 3.31077600  | 0.12257100  | 1.00933100  |
| H | 4.35222600  | -0.04626500 | 1.28000900  |

**Complex a...p**

|    |             |             |             |
|----|-------------|-------------|-------------|
| Cu | -0.98026800 | -0.07034100 | 0.38038400  |
| C  | 3.19295900  | 0.89801800  | -1.34034900 |
| C  | 2.96761000  | -0.30654700 | -0.39251600 |
| C  | 4.31295500  | -0.90192100 | 0.09030500  |
| O  | 4.01415900  | 1.78207700  | -1.09460700 |
| O  | 4.68825800  | -1.98397100 | -0.35153600 |
| H  | 2.48287700  | -1.10629600 | -0.96442900 |
| C  | 2.02306400  | 0.09895400  | 0.74539000  |
| C  | 0.98420000  | -0.80791900 | 1.09851000  |
| C  | 0.10769100  | -0.50266000 | 2.18245100  |
| C  | 0.27184300  | 0.72220400  | 2.87940000  |
| C  | 1.28099200  | 1.61302100  | 2.50802400  |
| C  | 2.15417900  | 1.30642700  | 1.44471300  |
| I  | -1.85231300 | -2.51121100 | -0.52369400 |
| H  | 0.94766400  | -1.79577400 | 0.64252000  |
| H  | -0.57596700 | -1.26637500 | 2.55188000  |
| H  | -0.40089500 | 0.96284000  | 3.70133800  |
| H  | 1.39251400  | 2.56037800  | 3.03609000  |
| H  | 2.92740000  | 2.01656400  | 1.15453900  |
| C  | 5.13823700  | -0.10401300 | 1.08237100  |
| C  | 2.29233000  | 0.93492600  | -2.55502000 |
| H  | 5.31444300  | 0.89887100  | 0.66843300  |
| H  | 6.08308100  | -0.62359100 | 1.27350000  |
| H  | 4.58145700  | 0.02636900  | 2.02029900  |

|   |             |            |             |
|---|-------------|------------|-------------|
| H | 2.54602500  | 1.79841000 | -3.18011200 |
| H | 1.24138800  | 1.00107400 | -2.21782800 |
| H | 2.38965900  | 0.00454500 | -3.13331500 |
| O | -2.56262700 | 0.97893000 | 1.11611200  |
| O | -0.66317500 | 1.24588900 | -1.16983800 |
| C | -3.05265400 | 2.00320000 | 0.53431900  |
| C | -1.44276200 | 2.23635400 | -1.40286600 |
| C | -1.08476100 | 3.07471800 | -2.63147200 |
| H | -1.79365600 | 3.89496600 | -2.80389700 |
| H | -0.07674100 | 3.49740900 | -2.51047200 |
| H | -1.06250600 | 2.42879500 | -3.52051000 |
| C | -4.28839700 | 2.60420200 | 1.20823000  |
| H | -4.05135300 | 2.85664600 | 2.25162300  |
| H | -4.65737100 | 3.50284100 | 0.69646200  |
| H | -5.08900200 | 1.85139200 | 1.23107900  |
| C | -2.57239700 | 2.62231100 | -0.64689700 |
| H | -3.12211900 | 3.49396200 | -1.00115600 |

#### Complex PhI

|   |             |             |             |
|---|-------------|-------------|-------------|
| C | 2.67465200  | 1.21205800  | -0.00000300 |
| C | 3.37727200  | 0.00000200  | -0.00000400 |
| C | 2.67466200  | -1.21205300 | -0.00000300 |
| C | 1.27145000  | -1.22246800 | -0.00000100 |
| C | 0.59126900  | -0.00000600 | -0.00000100 |
| C | 1.27144600  | 1.22246600  | -0.00000100 |
| H | 3.21272000  | 2.15923100  | -0.00000400 |
| H | 4.46611400  | 0.00001000  | -0.00000500 |
| H | 3.21272700  | -2.15922800 | -0.00000400 |
| H | 0.72693900  | -2.16343500 | 0.00000000  |
| H | 0.72692100  | 2.16342500  | -0.00000100 |
| I | -1.57565900 | 0.00000000  | 0.00000200  |

### 13. PBE0-optimised geometries (singlet spin state)

#### Complex b

|    |             |             |             |
|----|-------------|-------------|-------------|
| O  | 1.48652900  | -1.43130700 | -0.33934900 |
| O  | 1.07820100  | 1.41584900  | 0.09561000  |
| C  | 2.67927700  | -1.07756400 | -0.12247900 |
| C  | 2.32403200  | 1.36864900  | 0.25095000  |
| C  | 2.99911800  | 2.69282700  | 0.56923800  |
| H  | 2.56234800  | 3.10738100  | 1.48506100  |
| H  | 4.08289600  | 2.60624300  | 0.69649400  |
| H  | 2.78766200  | 3.40586500  | -0.23582400 |
| C  | 3.70242100  | -2.19905900 | -0.17701500 |
| H  | 3.65777800  | -2.68087500 | -1.16063700 |
| H  | 4.72561500  | -1.85780600 | 0.00849300  |
| H  | 3.43949500  | -2.96235900 | 0.56458700  |
| C  | 3.13886600  | 0.21990600  | 0.15810400  |
| H  | 4.20495500  | 0.34793800  | 0.32040000  |
| Cu | -0.13000500 | -0.23451600 | -0.31862700 |
| C  | -2.11665800 | -0.22575900 | -0.54424700 |
| H  | -2.23945600 | -0.66127300 | -1.54045100 |
| C  | -2.47376600 | 1.19895300  | -0.53976800 |
| C  | -2.39964700 | -1.15295700 | 0.54278800  |
| O  | -2.73873400 | 1.79925400  | -1.58217000 |
| O  | -2.66701400 | -0.87563500 | 1.71902300  |
| C  | -2.47024000 | 1.95156900  | 0.77745400  |
| H  | -2.86063900 | 1.32599400  | 1.58494200  |
| H  | -1.43169000 | 2.20055900  | 1.03068300  |
| H  | -3.03775200 | 2.87982600  | 0.65818000  |
| C  | -2.40480800 | -2.63460900 | 0.15681500  |
| H  | -1.99798100 | -2.82528800 | -0.84079100 |
| H  | -1.82769700 | -3.19988400 | 0.89547500  |
| H  | -3.43881100 | -3.00238500 | 0.19760100  |

#### Complex PhI...b

|   |            |            |             |
|---|------------|------------|-------------|
| O | 4.86947200 | 1.02235600 | -0.42339800 |
| O | 2.02499900 | 1.30524900 | 0.15199300  |
| C | 4.81945600 | 2.26703300 | -0.22724400 |
| C | 2.37844600 | 2.51113000 | 0.26351800  |
| C | 1.26936400 | 3.49173000 | 0.60230700  |
| H | 0.76596600 | 3.16348000 | 1.51906600  |
| H | 1.62754700 | 4.51676500 | 0.73727000  |
| H | 0.52155300 | 3.47957700 | -0.19973000 |
| C | 6.14248300 | 2.99838000 | -0.36626800 |
| H | 6.54418500 | 2.82859100 | -1.37185400 |
| H | 6.05948300 | 4.07526900 | -0.19101700 |
| H | 6.86354000 | 2.57412300 | 0.34180000  |

|    |             |             |             |
|----|-------------|-------------|-------------|
| C  | 3.67887900  | 3.02360600  | 0.10013500  |
| H  | 3.81288100  | 4.09245400  | 0.23538200  |
| Cu | 3.31690200  | -0.25643400 | -0.27993500 |
| C  | 2.96240200  | -2.21636200 | -0.48052900 |
| H  | 3.09664900  | -2.35021500 | -1.55797100 |
| C  | 1.55883100  | -2.32778200 | -0.09489100 |
| C  | 4.09370900  | -2.66747000 | 0.32255200  |
| O  | 0.66212000  | -2.40607600 | -0.94509700 |
| O  | 4.10036200  | -2.92500800 | 1.53171200  |
| C  | 1.18634700  | -2.30650200 | 1.37518100  |
| H  | 1.98528200  | -2.73243300 | 1.98735100  |
| H  | 1.04648500  | -1.26312200 | 1.68644300  |
| H  | 0.23667800  | -2.83343400 | 1.51150300  |
| C  | 5.39601500  | -2.87925800 | -0.45063700 |
| H  | 5.39325700  | -2.40616000 | -1.43701800 |
| H  | 6.23039400  | -2.48625800 | 0.13793500  |
| H  | 5.55821800  | -3.95826000 | -0.57525200 |
| C  | -1.86806200 | -0.59994600 | -0.29339200 |
| C  | -1.36777500 | 0.65015400  | 0.07092800  |
| C  | -2.24694000 | 1.68184400  | 0.39045900  |
| C  | -3.62739300 | 1.48377600  | 0.34963500  |
| C  | -4.09973100 | 0.23063900  | -0.01688900 |
| C  | -3.24588400 | -0.81671000 | -0.33872800 |
| H  | -1.17126900 | -1.40391800 | -0.53958200 |
| H  | -0.29129100 | 0.81339600  | 0.10164500  |
| H  | -1.86106800 | 2.65769900  | 0.67680600  |
| H  | -4.31200400 | 2.28833400  | 0.59774800  |
| H  | -3.63889300 | -1.78790800 | -0.62159800 |
| I  | -6.22819300 | -0.09338000 | -0.08828900 |

### Complex TS<sub>b-c</sub>

|    |             |             |             |
|----|-------------|-------------|-------------|
| Cu | -0.21876800 | -0.16460200 | 0.02659900  |
| C  | -1.31270400 | -2.54245000 | 0.87935500  |
| C  | -0.10971700 | -2.27628100 | 0.10448300  |
| C  | 0.04588700  | -2.60948100 | -1.30734800 |
| O  | -2.42916900 | -2.81913600 | 0.43193800  |
| O  | 1.16412000  | -2.75636000 | -1.82362600 |
| H  | 0.81808300  | -2.38454000 | 0.66565700  |
| C  | 1.92536900  | 0.29618400  | 0.29217400  |
| C  | 2.03159600  | 0.86677200  | 1.56525200  |
| C  | 2.92164900  | 0.30835600  | 2.47867100  |
| C  | 3.72721600  | -0.77003000 | 2.11811000  |
| C  | 3.62954600  | -1.30174700 | 0.83136700  |
| C  | 2.75014500  | -0.76291900 | -0.10116200 |
| I  | 1.22695400  | 1.68527000  | -1.37526700 |
| H  | 1.38412700  | 1.68819900  | 1.84730200  |



|   |             |             |             |
|---|-------------|-------------|-------------|
| H | 2.98343800  | 0.72880300  | 3.48013900  |
| H | 4.42945000  | -1.19180000 | 2.83311900  |
| H | 4.23858000  | -2.15553000 | 0.54334500  |
| H | 2.62803500  | -1.22637900 | -1.07573900 |
| C | -1.18882200 | -2.76156700 | -2.17084800 |
| C | -1.14885400 | -2.41891900 | 2.39466200  |
| H | -0.87133000 | -2.99838200 | -3.19089700 |
| H | -1.77547500 | -1.83700000 | -2.15105200 |
| H | -1.84296300 | -3.54109000 | -1.76843100 |
| H | -1.96871300 | -2.94972800 | 2.88750900  |
| H | -1.19507900 | -1.35839900 | 2.67176900  |
| H | -0.18570700 | -2.80849700 | 2.74398400  |
| O | -2.00152300 | 0.21125800  | -0.98038400 |
| O | -0.92533200 | 1.03672300  | 1.61257700  |
| C | -3.00152000 | 0.82067000  | -0.52818800 |
| C | -2.07530600 | 1.55610500  | 1.67760800  |
| C | -2.36554800 | 2.32460800  | 2.95606900  |
| H | -3.36331600 | 2.77368300  | 2.97113100  |
| H | -2.26565800 | 1.64797900  | 3.81292700  |
| H | -1.61552800 | 3.11436800  | 3.08159300  |
| C | -4.22887200 | 0.81450200  | -1.42107500 |
| H | -4.57523900 | -0.22006200 | -1.52643300 |
| H | -5.04839600 | 1.42756500  | -1.03342600 |
| H | -3.95197400 | 1.16691100  | -2.42075600 |
| C | -3.09026400 | 1.49200800  | 0.71078100  |
| H | -4.03020800 | 1.98330800  | 0.94254600  |

### Complex c

|    |             |             |             |
|----|-------------|-------------|-------------|
| Cu | 0.00333300  | 0.16266900  | -0.10139700 |
| C  | 1.13383000  | 2.59259900  | 0.80537900  |
| C  | -0.01953600 | 2.24119000  | -0.06033100 |
| C  | -0.06518200 | 2.62010700  | -1.50108500 |
| O  | 2.25839000  | 2.86041400  | 0.40251600  |
| O  | -1.14634400 | 2.88104200  | -2.02233400 |
| H  | -0.96646900 | 2.49998000  | 0.40792600  |
| C  | -1.83761500 | 0.27813500  | 0.40861600  |
| C  | -2.13698300 | -0.11830300 | 1.70827300  |
| C  | -3.46157000 | -0.06358200 | 2.14954500  |
| C  | -4.47225400 | 0.38216300  | 1.30274000  |
| C  | -4.15297700 | 0.78041000  | 0.00576100  |
| C  | -2.83477500 | 0.73342300  | -0.44725500 |
| H  | -1.34900900 | -0.48427200 | 2.35874800  |
| H  | -3.69731500 | -0.38159600 | 3.16375700  |
| H  | -5.50256800 | 0.42034300  | 1.65005100  |
| H  | -4.93241700 | 1.13613200  | -0.66524100 |
| H  | -2.58981400 | 1.07768500  | -1.44691800 |

|   |             |             |             |
|---|-------------|-------------|-------------|
| C | 1.20306000  | 2.69010600  | -2.31126300 |
| C | 0.83029300  | 2.62350400  | 2.29154400  |
| H | 1.90882600  | 3.38476200  | -1.84621400 |
| H | 0.95029100  | 2.99869100  | -3.32904000 |
| H | 1.69638900  | 1.71298300  | -2.30453000 |
| H | 1.69918900  | 3.01234900  | 2.82878100  |
| H | 0.61354000  | 1.60346800  | 2.63009300  |
| H | -0.04924200 | 3.24231800  | 2.50439200  |
| O | 1.81600600  | 0.09172000  | -0.79420100 |
| O | 0.81840500  | -0.53827000 | 1.85422600  |
| C | 2.82884200  | -0.49779100 | -0.30855800 |
| C | 1.94268400  | -1.08870100 | 1.94491700  |
| C | 2.23639700  | -1.79935500 | 3.25313400  |
| H | 3.26136500  | -2.17635500 | 3.31788500  |
| H | 2.04798000  | -1.11519000 | 4.08794400  |
| H | 1.54101500  | -2.64011300 | 3.35976600  |
| C | 4.02329900  | -0.52588300 | -1.23442000 |
| H | 4.29931700  | 0.50405100  | -1.48672300 |
| H | 4.88700400  | -1.03381300 | -0.79637100 |
| H | 3.74053900  | -1.02858900 | -2.16611600 |
| C | 2.94157200  | -1.09807700 | 0.94881500  |
| H | 3.88135000  | -1.58738700 | 1.18188600  |
| I | -0.57477000 | -2.20229800 | -1.12766200 |

### Complex TS<sub>c-p</sub>

|    |             |             |             |
|----|-------------|-------------|-------------|
| Cu | 0.06067900  | 0.17604700  | 0.04513700  |
| C  | 0.00347600  | 2.86225000  | 0.13860300  |
| C  | -1.11183900 | 1.90590300  | -0.24812400 |
| C  | -1.47931200 | 1.92169800  | -1.72142900 |
| O  | 0.58293100  | 3.53451800  | -0.69387600 |
| O  | -2.60290400 | 2.27657200  | -2.03446100 |
| H  | -1.99453000 | 2.26380400  | 0.28469000  |
| C  | -1.77871500 | 0.17668900  | 0.62228800  |
| C  | -1.89613900 | 0.19226800  | 2.01703700  |
| C  | -2.99697600 | -0.40784400 | 2.62506900  |
| C  | -4.00281500 | -0.98760400 | 1.85730100  |
| C  | -3.89521300 | -0.97116900 | 0.46716500  |
| C  | -2.79920300 | -0.38256700 | -0.15273000 |
| I  | 0.22399500  | -2.29395900 | -1.09892400 |
| H  | -1.10577100 | 0.61665700  | 2.62622300  |
| H  | -3.06178400 | -0.41919300 | 3.71127100  |
| H  | -4.86381600 | -1.44813600 | 2.33569800  |
| H  | -4.66752700 | -1.42853500 | -0.14684800 |
| H  | -2.72724800 | -0.38949500 | -1.23464900 |
| C  | -0.47512900 | 1.46836300  | -2.73904600 |

|   |             |             |             |
|---|-------------|-------------|-------------|
| C | 0.26737100  | 3.03205200  | 1.61474300  |
| H | 0.51187200  | 1.88151400  | -2.52067300 |
| H | -0.82083300 | 1.75427100  | -3.73592300 |
| H | -0.37492800 | 0.37366100  | -2.68651900 |
| H | 0.91629900  | 3.89825400  | 1.76536500  |
| H | 0.75250500  | 2.12631100  | 1.99981300  |
| H | -0.67099300 | 3.16437900  | 2.16639300  |
| O | 1.81544500  | 0.82116400  | -0.67778700 |
| O | 1.07427800  | -0.04857400 | 1.96093100  |
| C | 2.95826600  | 0.49972900  | -0.24525500 |
| C | 2.30845500  | -0.30156600 | 2.02133000  |
| C | 2.79181400  | -0.93186200 | 3.31328600  |
| H | 3.88119800  | -1.01880400 | 3.36809300  |
| H | 2.42956500  | -0.34477000 | 4.16467100  |
| H | 2.35104800  | -1.93198000 | 3.39894100  |
| C | 4.09605300  | 0.73893500  | -1.21422100 |
| H | 4.03992000  | 1.76642300  | -1.58949600 |
| H | 5.08028800  | 0.56529000  | -0.76916200 |
| H | 3.96921600  | 0.07059200  | -2.07388600 |
| C | 3.25571800  | -0.04773000 | 1.01311200  |
| H | 4.29123800  | -0.30048600 | 1.21677600  |

### Complex a...p

|    |             |             |             |
|----|-------------|-------------|-------------|
| Cu | -1.84991600 | 0.71151100  | 0.02516900  |
| C  | 2.77244100  | 0.04720200  | -1.81291200 |
| C  | 3.35982000  | -0.99257500 | -0.85462600 |
| C  | 4.45947000  | -0.35545400 | 0.00750400  |
| O  | 3.32731300  | 1.12132900  | -1.95150600 |
| O  | 5.61927200  | -0.66895700 | -0.16002500 |
| H  | 3.89059000  | -1.70142500 | -1.50738400 |
| C  | 2.35340200  | -1.76919200 | -0.03364500 |
| C  | 1.24676200  | -1.14934000 | 0.55532600  |
| C  | 0.34836200  | -1.88276900 | 1.32615600  |
| C  | 0.55272500  | -3.24591500 | 1.52607000  |
| C  | 1.65683300  | -3.87213500 | 0.95233500  |
| C  | 2.54952300  | -3.13810600 | 0.17713400  |
| I  | -3.77962400 | -0.80935400 | -0.44834200 |
| H  | 1.06015100  | -0.08848300 | 0.40594200  |
| H  | -0.51404400 | -1.37603200 | 1.74943300  |
| H  | -0.15569800 | -3.81927900 | 2.11812500  |
| H  | 1.82067500  | -4.93699400 | 1.10068100  |
| H  | 3.41084300  | -3.62915800 | -0.27191800 |
| C  | 4.03495200  | 0.61654200  | 1.07675800  |
| C  | 1.54738200  | -0.32117100 | -2.60401100 |
| H  | 3.32662700  | 1.35632600  | 0.69004200  |
| H  | 4.91981200  | 1.11276000  | 1.48083600  |

|   |             |             |             |
|---|-------------|-------------|-------------|
| H | 3.52462400  | 0.07363200  | 1.88124600  |
| H | 1.65624600  | 0.06333300  | -3.62245300 |
| H | 0.67735200  | 0.18214300  | -2.15773500 |
| H | 1.35271700  | -1.39657600 | -2.61397600 |
| O | -0.91694800 | 1.22024800  | 1.80749000  |
| O | -0.52183800 | 1.86563800  | -1.00099600 |
| C | -0.03788900 | 2.11444200  | 1.92746700  |
| C | 0.28063700  | 2.69869600  | -0.48981800 |
| C | 1.01109200  | 3.59501500  | -1.46933100 |
| H | 1.53205700  | 4.42228500  | -0.97747800 |
| H | 1.74805000  | 2.99963700  | -2.02177100 |
| H | 0.29308900  | 3.99437400  | -2.19328200 |
| C | 0.39839700  | 2.41996500  | 3.34961800  |
| H | 0.78794200  | 1.50462700  | 3.81015800  |
| H | 1.16160200  | 3.20194400  | 3.40792100  |
| H | -0.47563900 | 2.72535200  | 3.93595300  |
| C | 0.56617900  | 2.84479100  | 0.88240900  |
| H | 1.28773300  | 3.60746500  | 1.15957400  |

#### Complex PhI

|   |             |             |             |
|---|-------------|-------------|-------------|
| C | 2.64994800  | 1.20412800  | -0.00000300 |
| C | 3.34793300  | 0.00000200  | -0.00000400 |
| C | 2.64995700  | -1.20412300 | -0.00000300 |
| C | 1.25627900  | -1.21330900 | -0.00000100 |
| C | 0.57778800  | -0.00000500 | -0.00000100 |
| C | 1.25627500  | 1.21330700  | -0.00000200 |
| H | 3.18763400  | 2.14844200  | -0.00000400 |
| H | 4.43415300  | 0.00001000  | -0.00000500 |
| H | 3.18763900  | -2.14843900 | -0.00000400 |
| H | 0.71293900  | -2.15220700 | -0.00000100 |
| H | 0.71292200  | 2.15219800  | -0.00000100 |
| I | -1.55970500 | 0.00000000  | 0.00000200  |

## 14. MN15-optimised geometries (singlet spin state)

### Complex b

|    |             |             |             |
|----|-------------|-------------|-------------|
| O  | 1.34912600  | -1.33630600 | -0.26027700 |
| O  | 1.24694100  | 1.56626400  | -0.04496600 |
| C  | 2.56828400  | -1.10913800 | -0.03670900 |
| C  | 2.48387600  | 1.38472500  | 0.14223400  |
| C  | 3.29513600  | 2.65169000  | 0.37328100  |
| H  | 2.89891700  | 3.17442400  | 1.25158900  |
| H  | 4.36192400  | 2.45377900  | 0.52092000  |
| H  | 3.16529300  | 3.32045200  | -0.48545400 |
| C  | 3.46775000  | -2.33702200 | 0.02465100  |
| H  | 3.39513400  | -2.88177800 | -0.92395500 |
| H  | 4.51643700  | -2.08947000 | 0.21995000  |
| H  | 3.10153000  | -3.00722300 | 0.81097100  |
| C  | 3.16889500  | 0.15414100  | 0.15822300  |
| H  | 4.24101700  | 0.17892300  | 0.33923300  |
| Cu | -0.17344300 | 0.14246000  | -0.33189100 |
| C  | -2.18213300 | -0.23542800 | -0.59779400 |
| H  | -2.22666400 | -0.48474300 | -1.66192500 |
| C  | -2.78252700 | 1.06043900  | -0.28917800 |
| C  | -2.15761000 | -1.36506300 | 0.31565400  |
| O  | -3.14736900 | 1.84829100  | -1.16989200 |
| O  | -2.42283500 | -1.34041400 | 1.52853800  |
| C  | -2.95626600 | 1.45533100  | 1.17234100  |
| H  | -3.67495600 | 0.79010000  | 1.66239800  |
| H  | -2.01634800 | 1.33967800  | 1.72482800  |
| H  | -3.29894900 | 2.49460600  | 1.20477100  |
| C  | -1.71530600 | -2.69959400 | -0.29313600 |
| H  | -1.87854400 | -2.74155800 | -1.37645200 |
| H  | -0.64227600 | -2.83045800 | -0.10831200 |
| H  | -2.26017500 | -3.51122800 | 0.20164800  |

### Complex PhI...b

|   |             |             |             |
|---|-------------|-------------|-------------|
| O | 1.06773800  | 2.12750200  | -0.71420500 |
| O | 0.45388400  | 0.19224600  | 1.43408300  |
| C | 0.03761200  | 2.66455600  | -0.21323200 |
| C | -0.47403800 | 1.02481900  | 1.62241300  |
| C | -1.40773900 | 0.70176500  | 2.77821300  |
| H | -0.83473600 | 0.70756800  | 3.71323900  |
| H | -2.24715000 | 1.39993200  | 2.85923900  |
| H | -1.79591800 | -0.31429300 | 2.63645800  |
| C | -0.42718600 | 3.94152000  | -0.90086600 |
| H | -0.73189500 | 3.70133100  | -1.92772300 |
| H | -1.26399300 | 4.42408900  | -0.38569800 |
| H | 0.41386000  | 4.64068200  | -0.96898400 |

|    |             |             |             |
|----|-------------|-------------|-------------|
| C  | -0.72490300 | 2.20068000  | 0.87711900  |
| H  | -1.58667100 | 2.79586800  | 1.17042500  |
| Cu | 1.80012400  | 0.26572900  | -0.11599600 |
| C  | 3.61577200  | -0.70283100 | -0.52943000 |
| H  | 3.62275300  | -0.77744700 | -1.62040000 |
| C  | 3.33689100  | -1.95697300 | 0.14664200  |
| C  | 4.34677100  | 0.41330600  | 0.04084500  |
| O  | 2.97887300  | -2.97539000 | -0.47443800 |
| O  | 4.72943400  | 0.52292600  | 1.21654200  |
| C  | 3.44021900  | -2.01779800 | 1.66267800  |
| H  | 4.45741600  | -1.78391200 | 1.99192200  |
| H  | 2.78808400  | -1.26192300 | 2.11841300  |
| H  | 3.14098900  | -3.02115600 | 1.98301500  |
| C  | 4.61574300  | 1.58146700  | -0.91436900 |
| H  | 4.61711700  | 1.27313700  | -1.96646400 |
| H  | 3.82212300  | 2.32873900  | -0.78495600 |
| H  | 5.57495800  | 2.04226200  | -0.65463800 |
| C  | -0.19517700 | -2.40209700 | -0.56093200 |
| C  | 0.45353600  | -1.63887000 | -1.53447400 |
| C  | -0.15763200 | -0.48601000 | -2.03750600 |
| C  | -1.42415900 | -0.10295100 | -1.58905400 |
| C  | -2.06077300 | -0.90080600 | -0.64418900 |
| C  | -1.46605500 | -2.04037900 | -0.10920100 |
| H  | 0.32222800  | -3.26199400 | -0.14336100 |
| H  | 1.44433700  | -1.94923000 | -1.85758400 |
| H  | 0.36082400  | 0.13681900  | -2.76313000 |
| H  | -1.89083800 | 0.80758600  | -1.95467800 |
| H  | -1.97588400 | -2.62692100 | 0.65061100  |
| I  | -4.02516900 | -0.33173400 | 0.01895100  |

### Complex TS<sub>b-c</sub>

|    |             |             |             |
|----|-------------|-------------|-------------|
| Cu | -0.07851500 | 0.06804200  | -0.18280100 |
| C  | -1.79531200 | -2.03602400 | 0.50408900  |
| C  | -0.47742000 | -2.08318800 | -0.10961700 |
| C  | -0.23335800 | -2.44204500 | -1.50459200 |
| O  | -2.87997800 | -2.06428400 | -0.09159000 |
| O  | 0.87501200  | -2.85433700 | -1.87973300 |
| H  | 0.33193700  | -2.37295000 | 0.56346200  |
| C  | 1.83463400  | -0.23893000 | 0.45074500  |
| C  | 1.88011500  | -0.05339200 | 1.83121300  |
| C  | 2.74019000  | -0.87101400 | 2.57117200  |
| C  | 3.55060100  | -1.81284300 | 1.93389900  |
| C  | 3.50441800  | -1.94328400 | 0.54343500  |
| C  | 2.65540300  | -1.14000400 | -0.21981600 |
| I  | 1.59717200  | 1.93429400  | -0.95141000 |
| H  | 1.22500200  | 0.67013500  | 2.30803100  |

|   |             |             |             |
|---|-------------|-------------|-------------|
| H | 2.77284100  | -0.76323800 | 3.65424500  |
| H | 4.22126900  | -2.43969000 | 2.51826100  |
| H | 4.12700200  | -2.68003900 | 0.03993200  |
| H | 2.58953000  | -1.26377800 | -1.29593600 |
| C | -1.35345500 | -2.28921000 | -2.51649700 |
| C | -1.79269500 | -1.97121500 | 2.03108700  |
| H | -0.94389200 | -2.49082900 | -3.51146900 |
| H | -1.78535600 | -1.28395100 | -2.46018200 |
| H | -2.16484000 | -2.98728000 | -2.28252500 |
| H | -1.78427900 | -2.99155700 | 2.43877200  |
| H | -2.70781200 | -1.46898500 | 2.36172800  |
| H | -0.91381600 | -1.43560900 | 2.41032800  |
| O | -1.77716200 | 0.62987300  | -1.12958100 |
| O | -0.86373400 | 1.10730300  | 1.57676600  |
| C | -2.89365900 | 0.86285600  | -0.57937600 |
| C | -2.09441900 | 1.34221300  | 1.73764100  |
| C | -2.50849800 | 1.73231400  | 3.14914000  |
| H | -1.86262600 | 2.54339500  | 3.50360000  |
| H | -3.55700100 | 2.03995700  | 3.21770200  |
| H | -2.34520800 | 0.87056100  | 3.80967600  |
| C | -4.10119500 | 0.66886300  | -1.47223100 |
| H | -4.20668400 | -0.41404600 | -1.61488400 |
| H | -5.02359800 | 1.06847500  | -1.03808700 |
| H | -3.91534000 | 1.12799000  | -2.44918900 |
| C | -3.10443800 | 1.24190300  | 0.76176200  |
| H | -4.12886600 | 1.43017100  | 1.07328200  |

### Complex c

|    |             |            |             |
|----|-------------|------------|-------------|
| Cu | 0.00140700  | 0.08737500 | -0.18678300 |
| C  | 1.32645500  | 2.33498500 | 0.63149000  |
| C  | 0.17968300  | 2.17881800 | -0.29401400 |
| C  | 0.27268800  | 2.40418500 | -1.76191800 |
| O  | 2.50867100  | 2.29676600 | 0.30172200  |
| O  | -0.75634000 | 2.62880000 | -2.40168400 |
| H  | -0.73777100 | 2.61622400 | 0.09645200  |
| C  | -1.81308400 | 0.54209800 | 0.34211400  |
| C  | -2.08948800 | 0.36324500 | 1.69262000  |
| C  | -3.39133400 | 0.61935200 | 2.14207500  |
| C  | -4.37799100 | 1.04478400 | 1.25301400  |
| C  | -4.06543300 | 1.22032300 | -0.09776500 |
| C  | -2.77222700 | 0.97368200 | -0.56623800 |
| H  | -1.31378500 | 0.00836300 | 2.36665100  |
| H  | -3.62901700 | 0.47333200 | 3.19490900  |
| H  | -5.38795400 | 1.23935200 | 1.60931500  |
| H  | -4.82966500 | 1.55606100 | -0.79684100 |
| H  | -2.51246600 | 1.14004600 | -1.60830900 |

|   |             |             |             |
|---|-------------|-------------|-------------|
| C | 1.61270600  | 2.39249000  | -2.45842700 |
| C | 0.93546000  | 2.61647800  | 2.07378400  |
| H | 2.28098100  | 3.13396900  | -2.00822800 |
| H | 1.44605200  | 2.60511000  | -3.51842800 |
| H | 2.08782600  | 1.41650900  | -2.31805700 |
| H | 1.75215100  | 2.31583400  | 2.73584500  |
| H | 0.01834200  | 2.08341100  | 2.34486500  |
| H | 0.75883300  | 3.69556100  | 2.18753500  |
| O | 1.78365700  | -0.28372400 | -0.95712200 |
| O | 0.85375200  | -0.35382200 | 1.80527400  |
| C | 2.82836600  | -0.71325400 | -0.37860000 |
| C | 2.00049200  | -0.84564400 | 1.97334400  |
| C | 2.35350300  | -1.22843000 | 3.40261300  |
| H | 3.36711300  | -1.63011300 | 3.49984600  |
| H | 2.25111200  | -0.34282500 | 4.04169600  |
| H | 1.63250200  | -1.97339800 | 3.75813900  |
| C | 4.03319300  | -0.83842100 | -1.28967100 |
| H | 4.31893300  | 0.17143500  | -1.61112300 |
| H | 4.88854500  | -1.31313700 | -0.79885700 |
| H | 3.75443500  | -1.40729700 | -2.18316100 |
| C | 2.97815700  | -1.04866900 | 0.97512400  |
| H | 3.94397700  | -1.43707600 | 1.28731600  |
| I | -0.93048600 | -2.32614200 | -0.80539000 |

### Complex a...p

|    |             |             |             |
|----|-------------|-------------|-------------|
| Cu | 1.56885200  | -0.99715200 | 0.01217600  |
| C  | -1.96273300 | 0.65813700  | -1.96518000 |
| C  | -2.64651000 | 1.50564200  | -0.88388400 |
| C  | -3.96253200 | 0.85439100  | -0.43673600 |
| O  | -2.58207600 | -0.24494400 | -2.50441800 |
| O  | -5.02203700 | 1.41107100  | -0.66039300 |
| H  | -2.94820600 | 2.43227000  | -1.39645900 |
| C  | -1.75443800 | 1.87689500  | 0.28370300  |
| C  | -0.90840100 | 0.93238500  | 0.87871800  |
| C  | -0.09620600 | 1.28677300  | 1.95725400  |
| C  | -0.13409100 | 2.58974600  | 2.45751000  |
| C  | -0.98106000 | 3.53471100  | 1.87749400  |
| C  | -1.78523800 | 3.17901600  | 0.79493500  |
| I  | 3.38500000  | 0.70464400  | -0.54350700 |
| H  | -0.87214600 | -0.08679800 | 0.48804400  |
| H  | 0.56904700  | 0.53849500  | 2.38100600  |
| H  | 0.50745300  | 2.86953300  | 3.28998800  |
| H  | -1.00965400 | 4.55297600  | 2.26035400  |
| H  | -2.44415600 | 3.91515700  | 0.33559600  |
| C  | -3.88045500 | -0.45862300 | 0.30145800  |
| C  | -0.56337600 | 1.03910700  | -2.36751200 |



|   |             |             |             |
|---|-------------|-------------|-------------|
| H | -3.35608700 | -1.19742700 | -0.31477400 |
| H | -4.89111600 | -0.80447600 | 0.53139000  |
| H | -3.30033400 | -0.34649500 | 1.22526500  |
| H | -0.41161700 | 0.79233900  | -3.42155400 |
| H | 0.15650500  | 0.44794700  | -1.78284300 |
| H | -0.35015200 | 2.09502500  | -2.16995200 |
| O | 0.75748500  | -1.75882200 | 1.77582900  |
| O | 0.11397300  | -2.02233100 | -1.05836100 |
| C | -0.34507200 | -2.37107600 | 1.86719800  |
| C | -0.84162000 | -2.69205400 | -0.57202600 |
| C | -1.76189600 | -3.35742400 | -1.58068600 |
| H | -2.59559000 | -3.88676500 | -1.10672500 |
| H | -2.14787200 | -2.59340700 | -2.26400500 |
| H | -1.17692400 | -4.06847900 | -2.17637000 |
| C | -0.87455300 | -2.55367800 | 3.28075100  |
| H | -1.13843700 | -1.56428300 | 3.67801800  |
| H | -1.75635500 | -3.20079300 | 3.32721500  |
| H | -0.08204800 | -2.96017900 | 3.91824500  |
| C | -1.12887400 | -2.86209600 | 0.80219100  |
| H | -2.03041200 | -3.41423300 | 1.05795800  |

#### Complex PhI

|   |             |             |             |
|---|-------------|-------------|-------------|
| C | -2.65269300 | 1.20710900  | 0.00000300  |
| C | -3.35185300 | 0.00000000  | 0.00000400  |
| C | -2.65269500 | -1.20710700 | 0.00000300  |
| C | -1.25652000 | -1.21542000 | 0.00000100  |
| C | -0.57569600 | -0.00000100 | 0.00000100  |
| C | -1.25651900 | 1.21542000  | 0.00000200  |
| H | -3.19128500 | 2.15161700  | 0.00000400  |
| H | -4.43878100 | 0.00000300  | 0.00000500  |
| H | -3.19128700 | -2.15161600 | 0.00000400  |
| H | -0.71046100 | -2.15440900 | 0.00000100  |
| H | -0.71045700 | 2.15440700  | 0.00000100  |
| I | 1.56071900  | 0.00000000  | -0.00000200 |

## 15. $\omega$ -B97XD-optimised geometries (triplet spin state)

### Complex a

|    |             |             |             |
|----|-------------|-------------|-------------|
| C  | -2.51635600 | -1.24699300 | -0.00000300 |
| C  | -3.13920100 | 0.00007600  | 0.00016900  |
| H  | -4.22789500 | 0.00013000  | 0.00024300  |
| C  | -3.29531200 | -2.53134700 | -0.00010200 |
| H  | -3.05072800 | -3.14389400 | 0.88134400  |
| H  | -4.37547700 | -2.34653700 | 0.00006200  |
| H  | -3.05095100 | -3.14363200 | -0.88179200 |
| C  | -2.51623200 | 1.24708400  | 0.00025200  |
| C  | -3.29507200 | 2.53150900  | 0.00045400  |
| H  | -3.05056800 | 3.14402500  | -0.88103600 |
| H  | -4.37525200 | 2.34679500  | 0.00046000  |
| H  | -3.05052100 | 3.14378200  | 0.88210200  |
| O  | -1.18781500 | -1.43261400 | -0.00010700 |
| O  | -1.18767500 | 1.43258400  | 0.00018100  |
| Cu | -0.03464500 | -0.00007800 | -0.00002900 |
| I  | 2.52383100  | -0.00000300 | -0.00010900 |

### Complex b

|    |             |             |             |
|----|-------------|-------------|-------------|
| O  | -1.62836100 | -1.36449500 | 0.51904200  |
| O  | -0.67968000 | 1.21011600  | -0.31710900 |
| C  | -2.82253400 | -0.82964600 | 0.21728000  |
| C  | -1.99284700 | 1.41256000  | -0.50060800 |
| C  | -2.30254300 | 2.79197500  | -1.01088000 |
| H  | -1.79671500 | 2.98031400  | -1.96985800 |
| H  | -3.37891500 | 2.93776500  | -1.15558000 |
| H  | -1.94141200 | 3.56092400  | -0.31128600 |
| C  | -3.97806800 | -1.75933700 | 0.44669400  |
| H  | -4.03369100 | -2.07498000 | 1.50047300  |
| H  | -4.93145600 | -1.28827700 | 0.18198700  |
| H  | -3.87373500 | -2.68062300 | -0.14753000 |
| C  | -2.99072400 | 0.47098100  | -0.25831100 |
| H  | -4.01334900 | 0.78546200  | -0.45983100 |
| Cu | -0.06831800 | -0.43660500 | 0.30317600  |
| C  | 1.96253100  | -0.48258600 | 0.44185700  |
| H  | 2.07012600  | -1.27929800 | 1.18968500  |
| C  | 2.36020200  | 0.81871200  | 1.03419600  |
| C  | 2.41195500  | -0.91590200 | -0.88865400 |
| O  | 2.55741400  | 0.92301200  | 2.24046500  |
| O  | 2.80103100  | -0.19593800 | -1.80259300 |
| C  | 2.44540500  | 2.02984500  | 0.13092600  |
| H  | 3.08941900  | 1.82483800  | -0.72784200 |
| H  | 1.44274400  | 2.23160700  | -0.26474900 |
| H  | 2.80425500  | 2.88332900  | 0.71226500  |

|   |            |             |             |
|---|------------|-------------|-------------|
| C | 2.39390000 | -2.43305700 | -1.10876700 |
| H | 1.50412200 | -2.90306000 | -0.67600300 |
| H | 2.44026500 | -2.64160600 | -2.18015900 |
| H | 3.27267100 | -2.87767000 | -0.62452100 |

**Complex PhI...b**

|    |             |             |             |
|----|-------------|-------------|-------------|
| O  | -0.34071200 | -0.53515300 | 1.63096200  |
| O  | -1.25462100 | 1.67446900  | 0.11453100  |
| C  | 0.65029200  | 0.23530300  | 1.85371400  |
| C  | -0.13299800 | 2.15600800  | 0.50105500  |
| C  | 0.16088900  | 3.53841600  | -0.02931000 |
| H  | -0.69881700 | 4.19104100  | 0.15185600  |
| H  | 1.05909000  | 3.97152500  | 0.41496500  |
| H  | 0.30300300  | 3.46938700  | -1.11325900 |
| C  | 1.74037000  | -0.32120200 | 2.72380700  |
| H  | 2.59485800  | -0.55832900 | 2.07400900  |
| H  | 2.08308100  | 0.41799500  | 3.45361900  |
| H  | 1.39578200  | -1.22613100 | 3.22803100  |
| C  | 0.79806900  | 1.52651800  | 1.32370900  |
| H  | 1.73066300  | 2.03777800  | 1.52679600  |
| Cu | -1.66097300 | -0.20867900 | 0.32722900  |
| C  | -3.50734500 | -0.39110800 | -0.46116100 |
| H  | -3.44255100 | -1.38304100 | -0.91748000 |
| C  | -3.65014200 | 0.63261700  | -1.53113800 |
| C  | -4.35001200 | -0.39220800 | 0.75232100  |
| O  | -3.33353600 | 0.35449100  | -2.68223300 |
| O  | -4.86694100 | 0.59278600  | 1.26414800  |
| C  | -4.14297500 | 2.01826500  | -1.18539400 |
| H  | -5.10666200 | 1.97522300  | -0.67226900 |
| H  | -3.43396600 | 2.48101300  | -0.49250200 |
| H  | -4.20844500 | 2.60351900  | -2.10553400 |
| C  | -4.54510900 | -1.76551000 | 1.39577000  |
| H  | -3.59471900 | -2.30423400 | 1.49106900  |
| H  | -5.00024700 | -1.64491100 | 2.38092600  |
| H  | -5.20305600 | -2.37658600 | 0.76575900  |
| C  | -0.50166700 | -1.24954400 | -1.69686900 |
| C  | -0.74558700 | -2.46138100 | -1.02837800 |
| C  | 0.26658000  | -3.06863700 | -0.27992200 |
| C  | 1.52140400  | -2.46525200 | -0.18710000 |
| C  | 1.74029300  | -1.26161400 | -0.83868300 |
| C  | 0.75930100  | -0.64132200 | -1.58969600 |
| H  | -1.28018800 | -0.80902800 | -2.31954800 |
| H  | -1.71059200 | -2.95057300 | -1.13667800 |
| H  | 0.07262500  | -4.01127200 | 0.22727800  |
| H  | 2.31661700  | -2.92774300 | 0.39284100  |
| H  | 0.95513200  | 0.30420600  | -2.08846900 |

|   |            |            |             |
|---|------------|------------|-------------|
| I | 4.36481000 | 0.21817000 | -0.29635200 |
|---|------------|------------|-------------|

**Complex c**

|    |             |             |             |
|----|-------------|-------------|-------------|
| Cu | 0.10061400  | 0.06786900  | -0.80046300 |
| C  | -1.63013700 | 0.69156100  | 2.34156500  |
| C  | -0.23913000 | 0.28896900  | 2.52813000  |
| C  | 0.24698000  | -1.03948400 | 2.93556400  |
| O  | -2.57231700 | 0.00652700  | 2.73521800  |
| O  | 1.35651200  | -1.09804300 | 3.45466000  |
| H  | 0.53546200  | 1.04229400  | 2.41308600  |
| C  | 1.36633400  | 1.46914800  | -0.29168800 |
| C  | 1.12883800  | 2.80596400  | -0.64386000 |
| C  | 1.93859700  | 3.84230000  | -0.17536500 |
| C  | 3.01089300  | 3.56553500  | 0.66899600  |
| C  | 3.26908100  | 2.24446900  | 1.02989300  |
| C  | 2.46214000  | 1.21356500  | 0.54777600  |
| H  | 0.28818600  | 3.03908200  | -1.29321900 |
| H  | 1.72890400  | 4.87001800  | -0.46802600 |
| H  | 3.64235400  | 4.37032400  | 1.03966900  |
| H  | 4.10341500  | 2.01176900  | 1.68846300  |
| H  | 2.68544300  | 0.19008100  | 0.83862300  |
| C  | -0.59643300 | -2.26058700 | 2.68833800  |
| C  | -1.85386900 | 2.03627100  | 1.68447000  |
| H  | -1.56596600 | -2.15647600 | 3.18303000  |
| H  | -0.06163900 | -3.14189800 | 3.04719500  |
| H  | -0.78824100 | -2.34090100 | 1.61149700  |
| H  | -2.92087000 | 2.17728200  | 1.50285400  |
| H  | -1.30037200 | 2.10382400  | 0.74204600  |
| H  | -1.47777400 | 2.83496200  | 2.33590900  |
| O  | -1.49409400 | -1.05267500 | -0.23224100 |
| O  | -1.21859500 | 1.30128900  | -1.75991400 |
| C  | -2.72251000 | -0.84635700 | -0.43396000 |
| C  | -2.48013700 | 1.21821400  | -1.78277300 |
| C  | -3.18291300 | 2.34121800  | -2.52412500 |
| H  | -4.26153000 | 2.18381700  | -2.61168400 |
| H  | -3.00157600 | 3.28354700  | -1.99459900 |
| H  | -2.74660700 | 2.44112600  | -3.52291800 |
| C  | -3.66588600 | -1.83131700 | 0.22160100  |
| H  | -3.65115700 | -1.64261800 | 1.30085600  |
| H  | -4.69280200 | -1.73983500 | -0.14359900 |
| H  | -3.29918900 | -2.84766700 | 0.05098000  |
| C  | -3.25769800 | 0.22164500  | -1.17767500 |
| H  | -4.33564400 | 0.28383400  | -1.27733200 |
| I  | 1.63895900  | -2.03687300 | -1.21721700 |

**Complex TS<sub>c-p</sub>**

|    |             |             |             |
|----|-------------|-------------|-------------|
| Cu | 0.03276800  | -0.59099800 | -0.15619200 |
| C  | -1.92863800 | 2.26560100  | 0.23099700  |
| C  | -0.60150600 | 2.36132400  | 0.86411400  |
| C  | -0.42306700 | 1.97815800  | 2.29232200  |
| O  | -2.85401300 | 1.56736000  | 0.63874200  |
| O  | 0.21924500  | 2.70764000  | 3.03560300  |
| H  | -0.11813800 | 3.31917800  | 0.67861500  |
| C  | 0.74853900  | 1.26640200  | -0.17868000 |
| C  | 0.71621800  | 1.85719700  | -1.49810500 |
| C  | 1.65018400  | 2.78140000  | -1.92016200 |
| C  | 2.71909500  | 3.14036400  | -1.08606600 |
| C  | 2.86648000  | 2.50653800  | 0.15699300  |
| C  | 1.94266700  | 1.57513300  | 0.57945000  |
| I  | 2.31670500  | -1.94203000 | -0.17702600 |
| H  | -0.08792700 | 1.56397200  | -2.16578400 |
| H  | 1.57206300  | 3.21658300  | -2.91456900 |
| H  | 3.45123300  | 3.87239300  | -1.41716100 |
| H  | 3.72757900  | 2.73369000  | 0.78056100  |
| H  | 2.09018200  | 1.08655500  | 1.53807400  |
| C  | -0.95641200 | 0.65261000  | 2.78307500  |
| C  | -2.15687500 | 3.10846000  | -1.01604200 |
| H  | -1.93536500 | 0.43577800  | 2.35232500  |
| H  | -0.98602800 | 0.65806000  | 3.87574300  |
| H  | -0.27073400 | -0.14352900 | 2.46122900  |
| H  | -3.12311100 | 3.61525400  | -0.92803300 |
| H  | -2.20780600 | 2.42681200  | -1.87140300 |
| H  | -1.36473800 | 3.83781400  | -1.20081700 |
| O  | -0.99879200 | -2.07122200 | 0.65194600  |
| O  | -1.49968500 | -0.21057900 | -1.43817100 |
| C  | -2.20560800 | -2.37250700 | 0.42393800  |
| C  | -2.65705300 | -0.71367900 | -1.36016400 |
| C  | -3.71704700 | -0.05467900 | -2.21741600 |
| H  | -4.55967800 | -0.71924700 | -2.42956700 |
| H  | -4.08572300 | 0.81385200  | -1.65879800 |
| H  | -3.27482600 | 0.29633100  | -3.15410400 |
| C  | -2.75652500 | -3.48794700 | 1.28977400  |
| H  | -2.62676200 | -3.21775800 | 2.34267800  |
| H  | -3.81303100 | -3.69250100 | 1.09559800  |
| H  | -2.17243900 | -4.39706400 | 1.11278400  |
| C  | -3.04267500 | -1.77609700 | -0.52814100 |
| H  | -4.07107400 | -2.11494200 | -0.58568600 |

## 16. B3LYP-D3-optimised geometries (triplet spin state)

### Complex a

|    |             |             |             |
|----|-------------|-------------|-------------|
| C  | -2.53861300 | -1.24983300 | 0.00003800  |
| C  | -3.16360400 | 0.00013500  | 0.00018800  |
| H  | -4.25222700 | 0.00022400  | 0.00024700  |
| C  | -3.31369400 | -2.53881100 | -0.00008700 |
| H  | -3.06707000 | -3.15447900 | 0.88085100  |
| H  | -4.39565700 | -2.36011500 | 0.00001800  |
| H  | -3.06720400 | -3.15423400 | -0.88123700 |
| C  | -2.53839300 | 1.24997100  | 0.00026500  |
| C  | -3.31327700 | 2.53910400  | 0.00047500  |
| H  | -3.06659600 | 3.15470400  | -0.88048600 |
| H  | -4.39526800 | 2.36059500  | 0.00047500  |
| H  | -3.06655800 | 3.15444500  | 0.88160800  |
| O  | -1.20418000 | -1.43860100 | -0.00004400 |
| O  | -1.20397600 | 1.43852600  | 0.00019400  |
| Cu | -0.03320900 | -0.00012500 | 0.00000700  |
| I  | 2.54234700  | -0.00000600 | -0.00015400 |

### Complex b

|    |             |             |             |
|----|-------------|-------------|-------------|
| O  | 1.66502100  | -1.35539700 | -0.53205400 |
| O  | 0.64346800  | 1.19620300  | 0.32340900  |
| C  | 2.84949400  | -0.78728600 | -0.22577500 |
| C  | 1.95758100  | 1.43189300  | 0.50681600  |
| C  | 2.22427200  | 2.81735600  | 1.03143700  |
| H  | 1.71518500  | 2.98237400  | 1.99500700  |
| H  | 3.29641400  | 2.99824100  | 1.17369400  |
| H  | 1.83353900  | 3.58476000  | 0.34351300  |
| C  | 4.02663000  | -1.69130800 | -0.45857900 |
| H  | 4.08528000  | -2.01191100 | -1.51255300 |
| H  | 4.97232900  | -1.20062600 | -0.19883900 |
| H  | 3.94648900  | -2.61662800 | 0.13690600  |
| C  | 2.98365900  | 0.51794800  | 0.25791200  |
| H  | 3.99716000  | 0.85912300  | 0.46207200  |
| Cu | 0.06316100  | -0.47721200 | -0.31361000 |
| C  | -1.98411700 | -0.52125100 | -0.42600000 |
| H  | -2.10751300 | -1.35944900 | -1.12521300 |
| C  | -2.37730700 | 0.75003100  | -1.08464200 |
| C  | -2.38873900 | -0.87404900 | 0.94418700  |
| O  | -2.58520300 | 0.79168600  | -2.29877600 |
| O  | -2.75835600 | -0.09771400 | 1.82675000  |
| C  | -2.44649900 | 2.01157900  | -0.24415000 |
| H  | -3.09963100 | 1.86466900  | 0.62019600  |
| H  | -1.44352700 | 2.21454800  | 0.14993000  |
| H  | -2.78631600 | 2.83994600  | -0.87288600 |

|   |             |             |            |
|---|-------------|-------------|------------|
| C | -2.33716700 | -2.37888900 | 1.25988100 |
| H | -1.42140300 | -2.84221400 | 0.87388600 |
| H | -2.39729600 | -2.52219200 | 2.34187700 |
| H | -3.18867100 | -2.88586500 | 0.78592800 |

**Complex PhI...b**

|    |             |             |             |
|----|-------------|-------------|-------------|
| O  | 0.28068200  | 0.38205500  | 1.65107500  |
| O  | 1.35802900  | -1.67663900 | 0.01376700  |
| C  | -0.64564300 | -0.47877300 | 1.84064300  |
| C  | 0.28361900  | -2.27055200 | 0.39415300  |
| C  | 0.11778200  | -3.66350200 | -0.17718000 |
| H  | 1.01686900  | -4.25298500 | 0.03480500  |
| H  | -0.76234500 | -4.17654100 | 0.21790900  |
| H  | 0.02628600  | -3.58706800 | -1.26691300 |
| C  | -1.77450400 | -0.04536700 | 2.73853400  |
| H  | -2.60859500 | 0.26825900  | 2.09464200  |
| H  | -2.13557800 | -0.86845400 | 3.36303500  |
| H  | -1.45820300 | 0.79586100  | 3.36016800  |
| C  | -0.69316900 | -1.75491600 | 1.24801500  |
| H  | -1.56943700 | -2.35947100 | 1.44537700  |
| Cu | 1.62950600  | 0.23678100  | 0.30766100  |
| C  | 3.51444100  | 0.51415800  | -0.44403400 |
| H  | 3.44803100  | 1.55633800  | -0.76757400 |
| C  | 3.66122700  | -0.37154600 | -1.62809300 |
| C  | 4.30054700  | 0.34764800  | 0.79380600  |
| O  | 3.34452100  | 0.04415800  | -2.74428100 |
| O  | 4.81998100  | -0.69937600 | 1.17984300  |
| C  | 4.16006000  | -1.79074200 | -1.45046700 |
| H  | 5.13048300  | -1.80510100 | -0.94657700 |
| H  | 3.46267200  | -2.33068100 | -0.80347000 |
| H  | 4.21598800  | -2.26678400 | -2.43312300 |
| C  | 4.43216000  | 1.61610300  | 1.64750700  |
| H  | 3.46340800  | 2.11731100  | 1.76832300  |
| H  | 4.83628100  | 1.35464200  | 2.62829900  |
| H  | 5.10825500  | 2.32843100  | 1.15649700  |
| C  | 0.47170200  | 1.40122300  | -1.59002000 |
| C  | 0.72121400  | 2.50728500  | -0.74769700 |
| C  | -0.30100900 | 3.01899600  | 0.06656100  |
| C  | -1.56289700 | 2.41768500  | 0.05751800  |
| C  | -1.79107600 | 1.31145500  | -0.75678800 |
| C  | -0.80067800 | 0.79608100  | -1.57966200 |
| H  | 1.25303100  | 1.05025500  | -2.26323700 |
| H  | 1.68948700  | 2.99939100  | -0.78141700 |
| H  | -0.10247700 | 3.87724900  | 0.70658800  |
| H  | -2.35916200 | 2.80456700  | 0.69062200  |
| H  | -0.99289700 | -0.06978300 | -2.20919100 |

|   |             |             |             |
|---|-------------|-------------|-------------|
| I | -4.37558700 | -0.18934100 | -0.34333800 |
|---|-------------|-------------|-------------|

**Complex c**

|    |             |             |             |
|----|-------------|-------------|-------------|
| Cu | -0.03131700 | 0.24968800  | 0.68866400  |
| C  | 1.48555200  | 0.26742600  | -2.50160000 |
| C  | 0.10439300  | -0.20289400 | -2.48457200 |
| C  | -0.36270500 | -1.59412000 | -2.56903100 |
| O  | 2.43745400  | -0.45877500 | -2.80920000 |
| O  | -1.52139100 | -1.77939700 | -2.95051800 |
| H  | -0.68863700 | 0.53766000  | -2.46304100 |
| C  | -1.47867600 | 1.42602900  | 0.10337500  |
| C  | -1.40426400 | 2.81008800  | 0.33777400  |
| C  | -2.36752700 | 3.69042500  | -0.16943700 |
| C  | -3.43067300 | 3.20318200  | -0.93395500 |
| C  | -3.52446900 | 1.83004800  | -1.17789400 |
| C  | -2.56573700 | 0.95452100  | -0.65638400 |
| H  | -0.57209500 | 3.19964100  | 0.91776700  |
| H  | -2.28538600 | 4.75885400  | 0.02982800  |
| H  | -4.17891600 | 3.88554000  | -1.33418400 |
| H  | -4.34696900 | 1.43640300  | -1.77330600 |
| H  | -2.65543100 | -0.10963800 | -0.85586200 |
| C  | 0.55063300  | -2.72861200 | -2.17859600 |
| C  | 1.69343800  | 1.73090100  | -2.14984300 |
| H  | 1.48275900  | -2.68222900 | -2.74849700 |
| H  | 0.03121100  | -3.67631300 | -2.33702700 |
| H  | 0.81140100  | -2.60945600 | -1.12022200 |
| H  | 2.76248900  | 1.95338200  | -2.14103200 |
| H  | 1.25778400  | 1.95265000  | -1.16916600 |
| H  | 1.18434700  | 2.37260500  | -2.88077900 |
| O  | 1.62436400  | -0.84514600 | 0.31598300  |
| O  | 1.22181800  | 1.75245600  | 1.36865200  |
| C  | 2.84585800  | -0.53560300 | 0.46405100  |
| C  | 2.49129700  | 1.73214300  | 1.41879800  |
| C  | 3.12976200  | 2.99900500  | 1.96972300  |
| H  | 4.22297800  | 2.95369800  | 1.99585300  |
| H  | 2.81843100  | 3.85122200  | 1.35402700  |
| H  | 2.75225400  | 3.17975400  | 2.98278200  |
| C  | 3.83822100  | -1.57229100 | -0.02598400 |
| H  | 3.76839500  | -1.61146100 | -1.11895000 |
| H  | 4.86997100  | -1.34634500 | 0.26157400  |
| H  | 3.55284400  | -2.55546200 | 0.36258500  |
| C  | 3.32161000  | 0.67744400  | 1.00245000  |
| H  | 4.39487200  | 0.80941300  | 1.08568800  |
| I  | -1.40249700 | -1.90604000 | 1.52619100  |

**Complex TS<sub>c-p</sub>**



|    |             |             |             |
|----|-------------|-------------|-------------|
| Cu | -0.09317700 | -0.56469900 | 0.14059600  |
| C  | 2.21010500  | 2.09377600  | -0.11305500 |
| C  | 0.92839800  | 2.27643500  | -0.83184700 |
| C  | 0.83048500  | 1.90141500  | -2.27736600 |
| O  | 3.09801100  | 1.29985400  | -0.43586900 |
| O  | 0.21194000  | 2.63605500  | -3.04487800 |
| H  | 0.54656700  | 3.28972300  | -0.71107100 |
| C  | -0.53347400 | 1.40336700  | 0.08296000  |
| C  | -0.54727100 | 1.90790400  | 1.44836100  |
| C  | -1.52948200 | 2.75750700  | 1.91670900  |
| C  | -2.58982900 | 3.15890400  | 1.07951500  |
| C  | -2.66599100 | 2.64437800  | -0.22908900 |
| C  | -1.70033200 | 1.78110600  | -0.70397000 |
| I  | -2.56441700 | -1.60586400 | 0.12929200  |
| H  | 0.24666500  | 1.58075100  | 2.11088100  |
| H  | -1.50017600 | 3.10026100  | 2.95033200  |
| H  | -3.35957500 | 3.83092500  | 1.45134900  |
| H  | -3.51190700 | 2.90502000  | -0.86223400 |
| H  | -1.79201400 | 1.38450500  | -1.70924000 |
| C  | 1.42346600  | 0.59709500  | -2.76562300 |
| C  | 2.44342400  | 2.97128200  | 1.11601000  |
| H  | 2.47545000  | 0.52142500  | -2.48052700 |
| H  | 1.28896000  | 0.52961200  | -3.84861400 |
| H  | 0.91781500  | -0.24992300 | -2.28346300 |
| H  | 3.38201100  | 3.52247300  | 0.98380800  |
| H  | 2.56258900  | 2.31256800  | 1.98268700  |
| H  | 1.62965200  | 3.67222700  | 1.31708900  |
| O  | 0.74642900  | -2.17684300 | -0.65413900 |
| O  | 1.45971100  | -0.36654200 | 1.44255600  |
| C  | 1.89875100  | -2.64430500 | -0.38540600 |
| C  | 2.54223700  | -1.02987700 | 1.39372000  |
| C  | 3.66728500  | -0.49727200 | 2.26061000  |
| H  | 4.45089100  | -1.23861600 | 2.44758400  |
| H  | 4.10180200  | 0.35306700  | 1.72125800  |
| H  | 3.26534700  | -0.13466100 | 3.21212700  |
| C  | 2.30944500  | -3.83578300 | -1.23400300 |
| H  | 2.34207000  | -3.52811000 | -2.28594900 |
| H  | 3.28280500  | -4.24817100 | -0.95099900 |
| H  | 1.54344400  | -4.61454000 | -1.14986600 |
| C  | 2.78909800  | -2.15375700 | 0.58304400  |
| H  | 3.75721600  | -2.63470500 | 0.67028900  |
